# Supplementary material for: Genome-Wide Identification and Comprehensive Analysis of the FtsH Gene Family in Soybean (Glycine max)
Source: MDPI journal article supplement (doi:10.3390/ijms242316996), 2023-11-30
Supplement: s1 [file s1]

**Supplementary Table S4.** List of Primers

| <b>Primer name</b> | <b>Primer sequence</b>                     |
|--------------------|--------------------------------------------|
| GmFtsH1-RT-F       | CTGCTGCTACTTCTTCTTTGGAG                    |
| GmFtsH1-RT-R       | TCCACCTCATTTTCCAGCATCT                     |
| GmFtsH2-RT-F       | CCGAGTTGGGGAATCGGTTG                       |
| GmFtsH2-RT-R       | AAGCAAGAGGAAATCCGGGC                       |
| GmFtsH5-RT-F       | ATGTAAGGAACACTCCCCGC                       |
| GmFtsH5-RT-R       | AGAGCAACCTTCGTCATTTCC                      |
| GmFtsH10-RT-F      | CCCACCTTTGATGCACAAGCC                      |
| GmFtsH10-RT-R      | TTCTGGCTCAGCTCTTGTGG                       |
| GmFtsH11-RT-F      | ACTACTAGGTTGCAGGAATCAGA                    |
| GmFtsH11-RT-R      | TGGGGAACCAAACCTCCACCT                      |
| GmFtsH12-RT-F      | CAGCAGAGAAGCCAAACTCCT                      |
| GmFtsH12-RT-R      | CTGGCAAGAATCACGGCTTG                       |
| GmFtsH13-RT-F      | GCCTTGATCGGAAGGAATGT                       |
| GmFtsH13-RT-R      | GCAGCTTGTGAATTGTGAGCA                      |
| GmFtsH16-RT-F      | GCTTGAGGGTATGGGTGTCC                       |
| GmFtsH16-RT-R      | GGCAGGAGCTGTGAAAATGC                       |
| GmFtsH24-RT-F      | GGCGTACACTTAGGTTCAATGCAG                   |
| GmFtsH24-RT-R      | GCTCTTCCTTTGCCTCATCAAC                     |
| GmFtsHi1-RT-F      | CTCACCACCACATTCCCCTC                       |
| GmFtsHi1-RT-R      | TTCATCCGTTTCCTCTCCGC                       |
| GmFtsHi4-RT-F      | CCACGAACCCCACTCTTACTC                      |
| GmFtsHi4-RT-R      | GGCTCTCTCTTTCTCCTCGG                       |
| GmFtsHi5-RT-F      | TTTGGGTGTGTGTGGAGGTT                       |
| GmFtsHi5-RT-R      | CCCTAGCTCCTTGTTCCACAC                      |
| GmFtsHi6-RT-F      | AAAAGACTTCCCAAACCCCGT                      |
| GmFtsHi6-RT-R      | GGGGTTTTGTCATTGTCTCGTCG                    |
| GmFtsH18-RT-F      | TCCACGCTCCTATGTTGCAC                       |
| GmFtsH18-RT-R      | GCACCTTCTTTTTCTTCTTCGGG                    |
| GmActin11-RT-F     | GCGGGAAATTGTAAGGGATGT                      |
| GmActin11-RT-R     | TCGCCAATAGTGATGACCTG                       |
| GmFtsH13-F         | ATGGCCTTGGGCACCAGCGCCTT                    |
| GmFtsH13-R         | TTATGCAACATATAATTCTGGC                     |
| pGDG-GmFtsH13-F    | TCTCTCTACAAGATCTCGAGATGGCCTTGGGCACCAGCGC   |
| PGDG-GmFtsH13-R    | CCCTTGCTCACCATGTCTGACTGCAACATATAATTCTGGCTT |
