# Supplementary material for: Genome-Wide Identification and Comprehensive Analysis of the FtsH Gene Family in Soybean (Glycine max)
Source: MDPI journal article supplement (doi:10.3390/ijms242316996), 2023-11-30
Supplement: s1 [file s1]

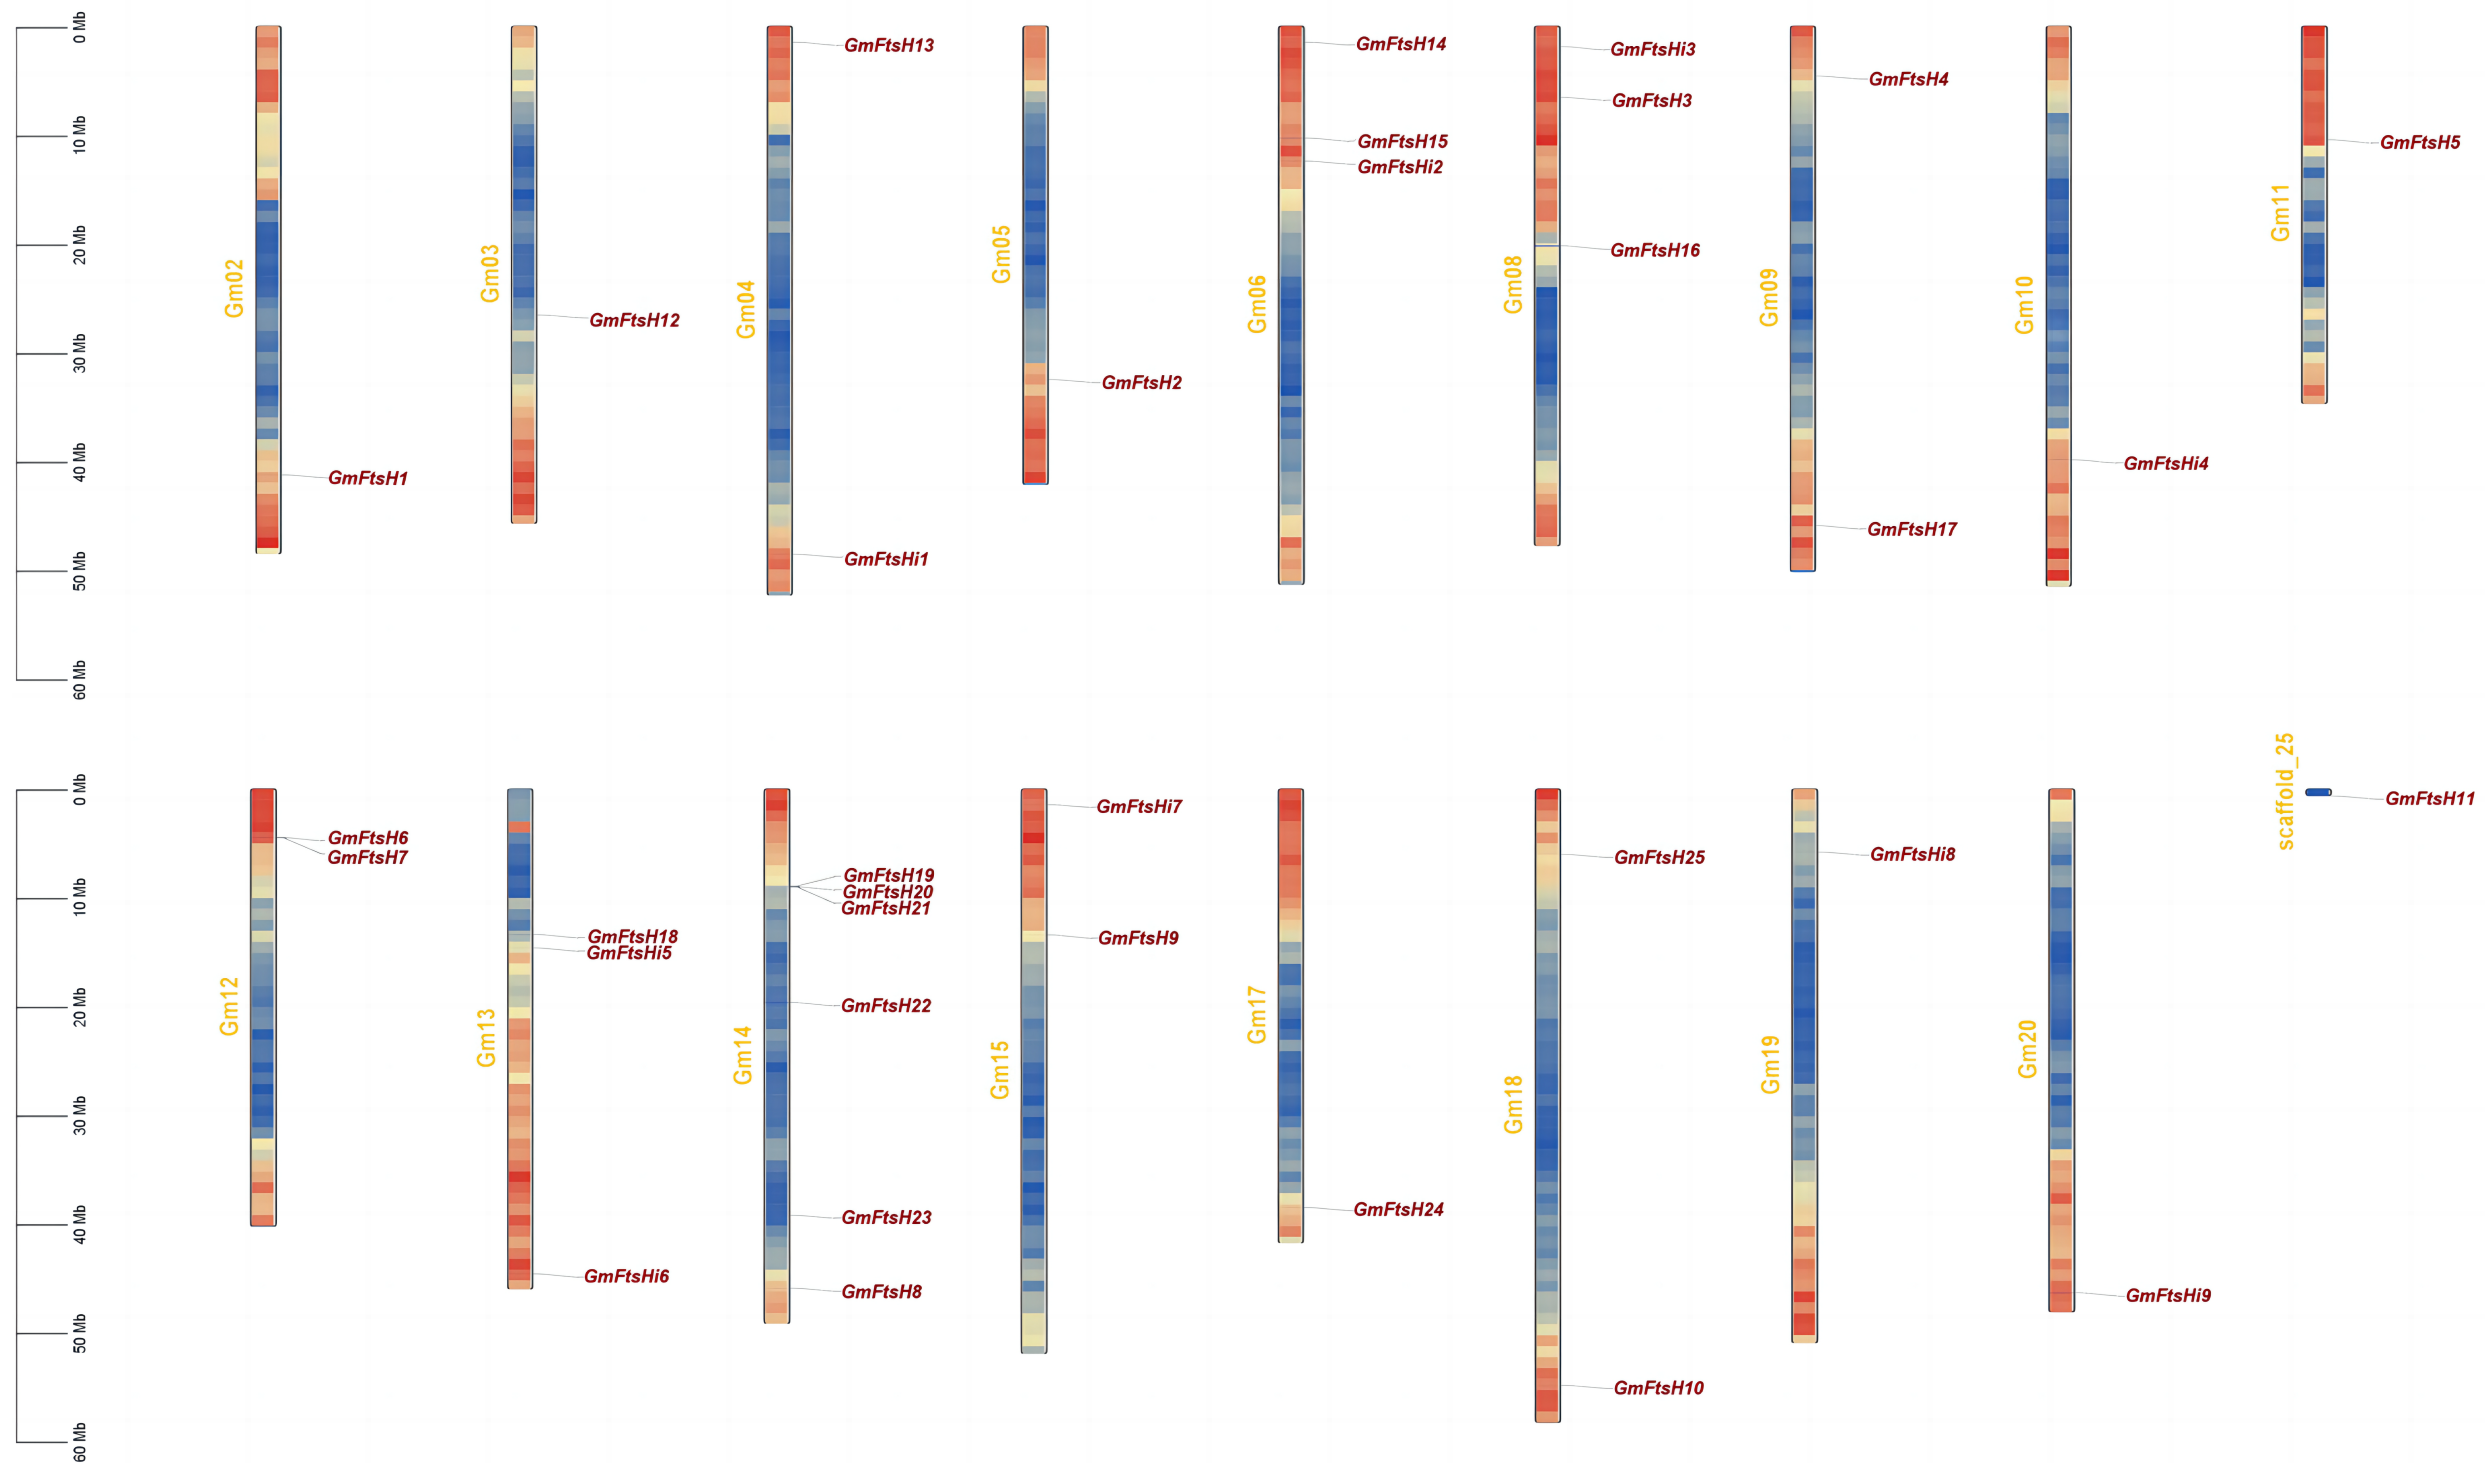

**Figure S2.** Chromosomal location analysis of *GmFtsH* genes. Gm01~Gm20 represent 20 chromosomes of *Glycine max*. The scale on the left shows megabases (Mb).
