# Supplementary material for: Genome-Wide Identification and Comprehensive Analysis of the FtsH Gene Family in Soybean (Glycine max)
Source: Int J Mol Sci. 2023 Nov 30;24(23):16996. doi: 10.3390/ijms242316996 (PMC10707429; doi:10.3390/ijms242316996)

**Group 1**

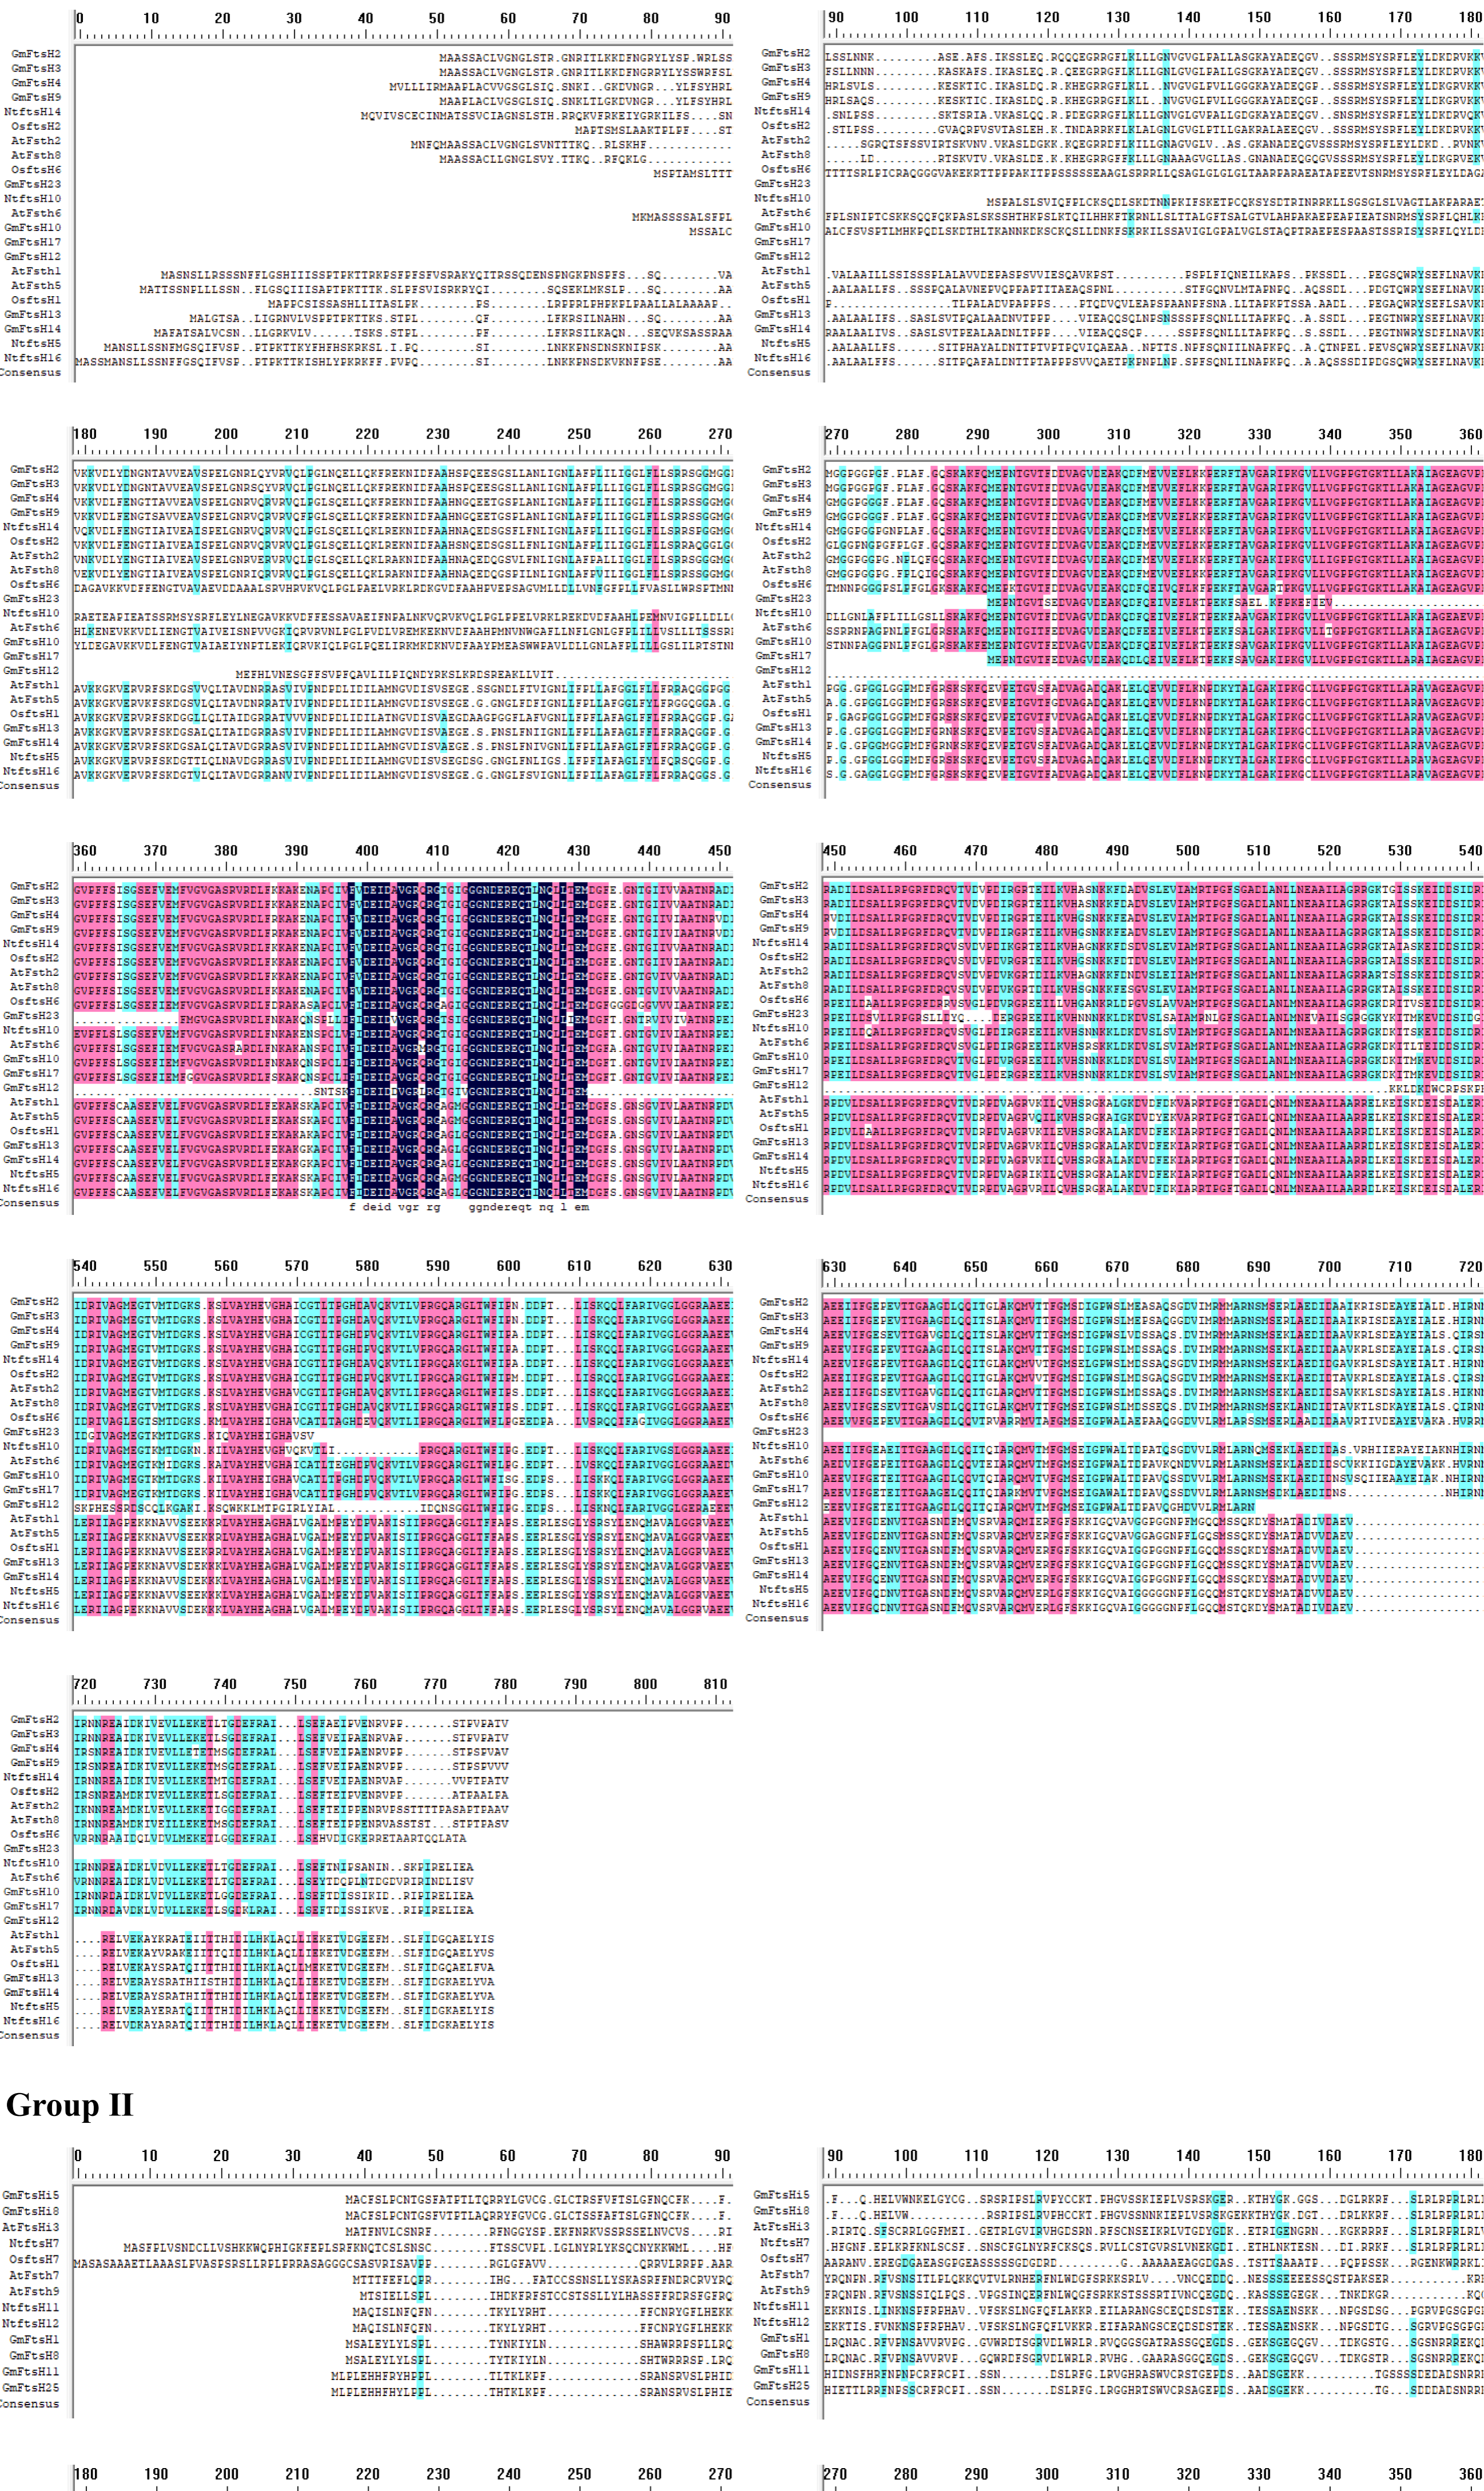

|          |           |
|----------|-----------|
| GmFtsH15 | LRLLANRM. |
| GmFtsH18 | LRLLANRM. |
| AtFtsH13 | LRLVAMRL. |
| NtftsH7  | LRLLSBRL  |

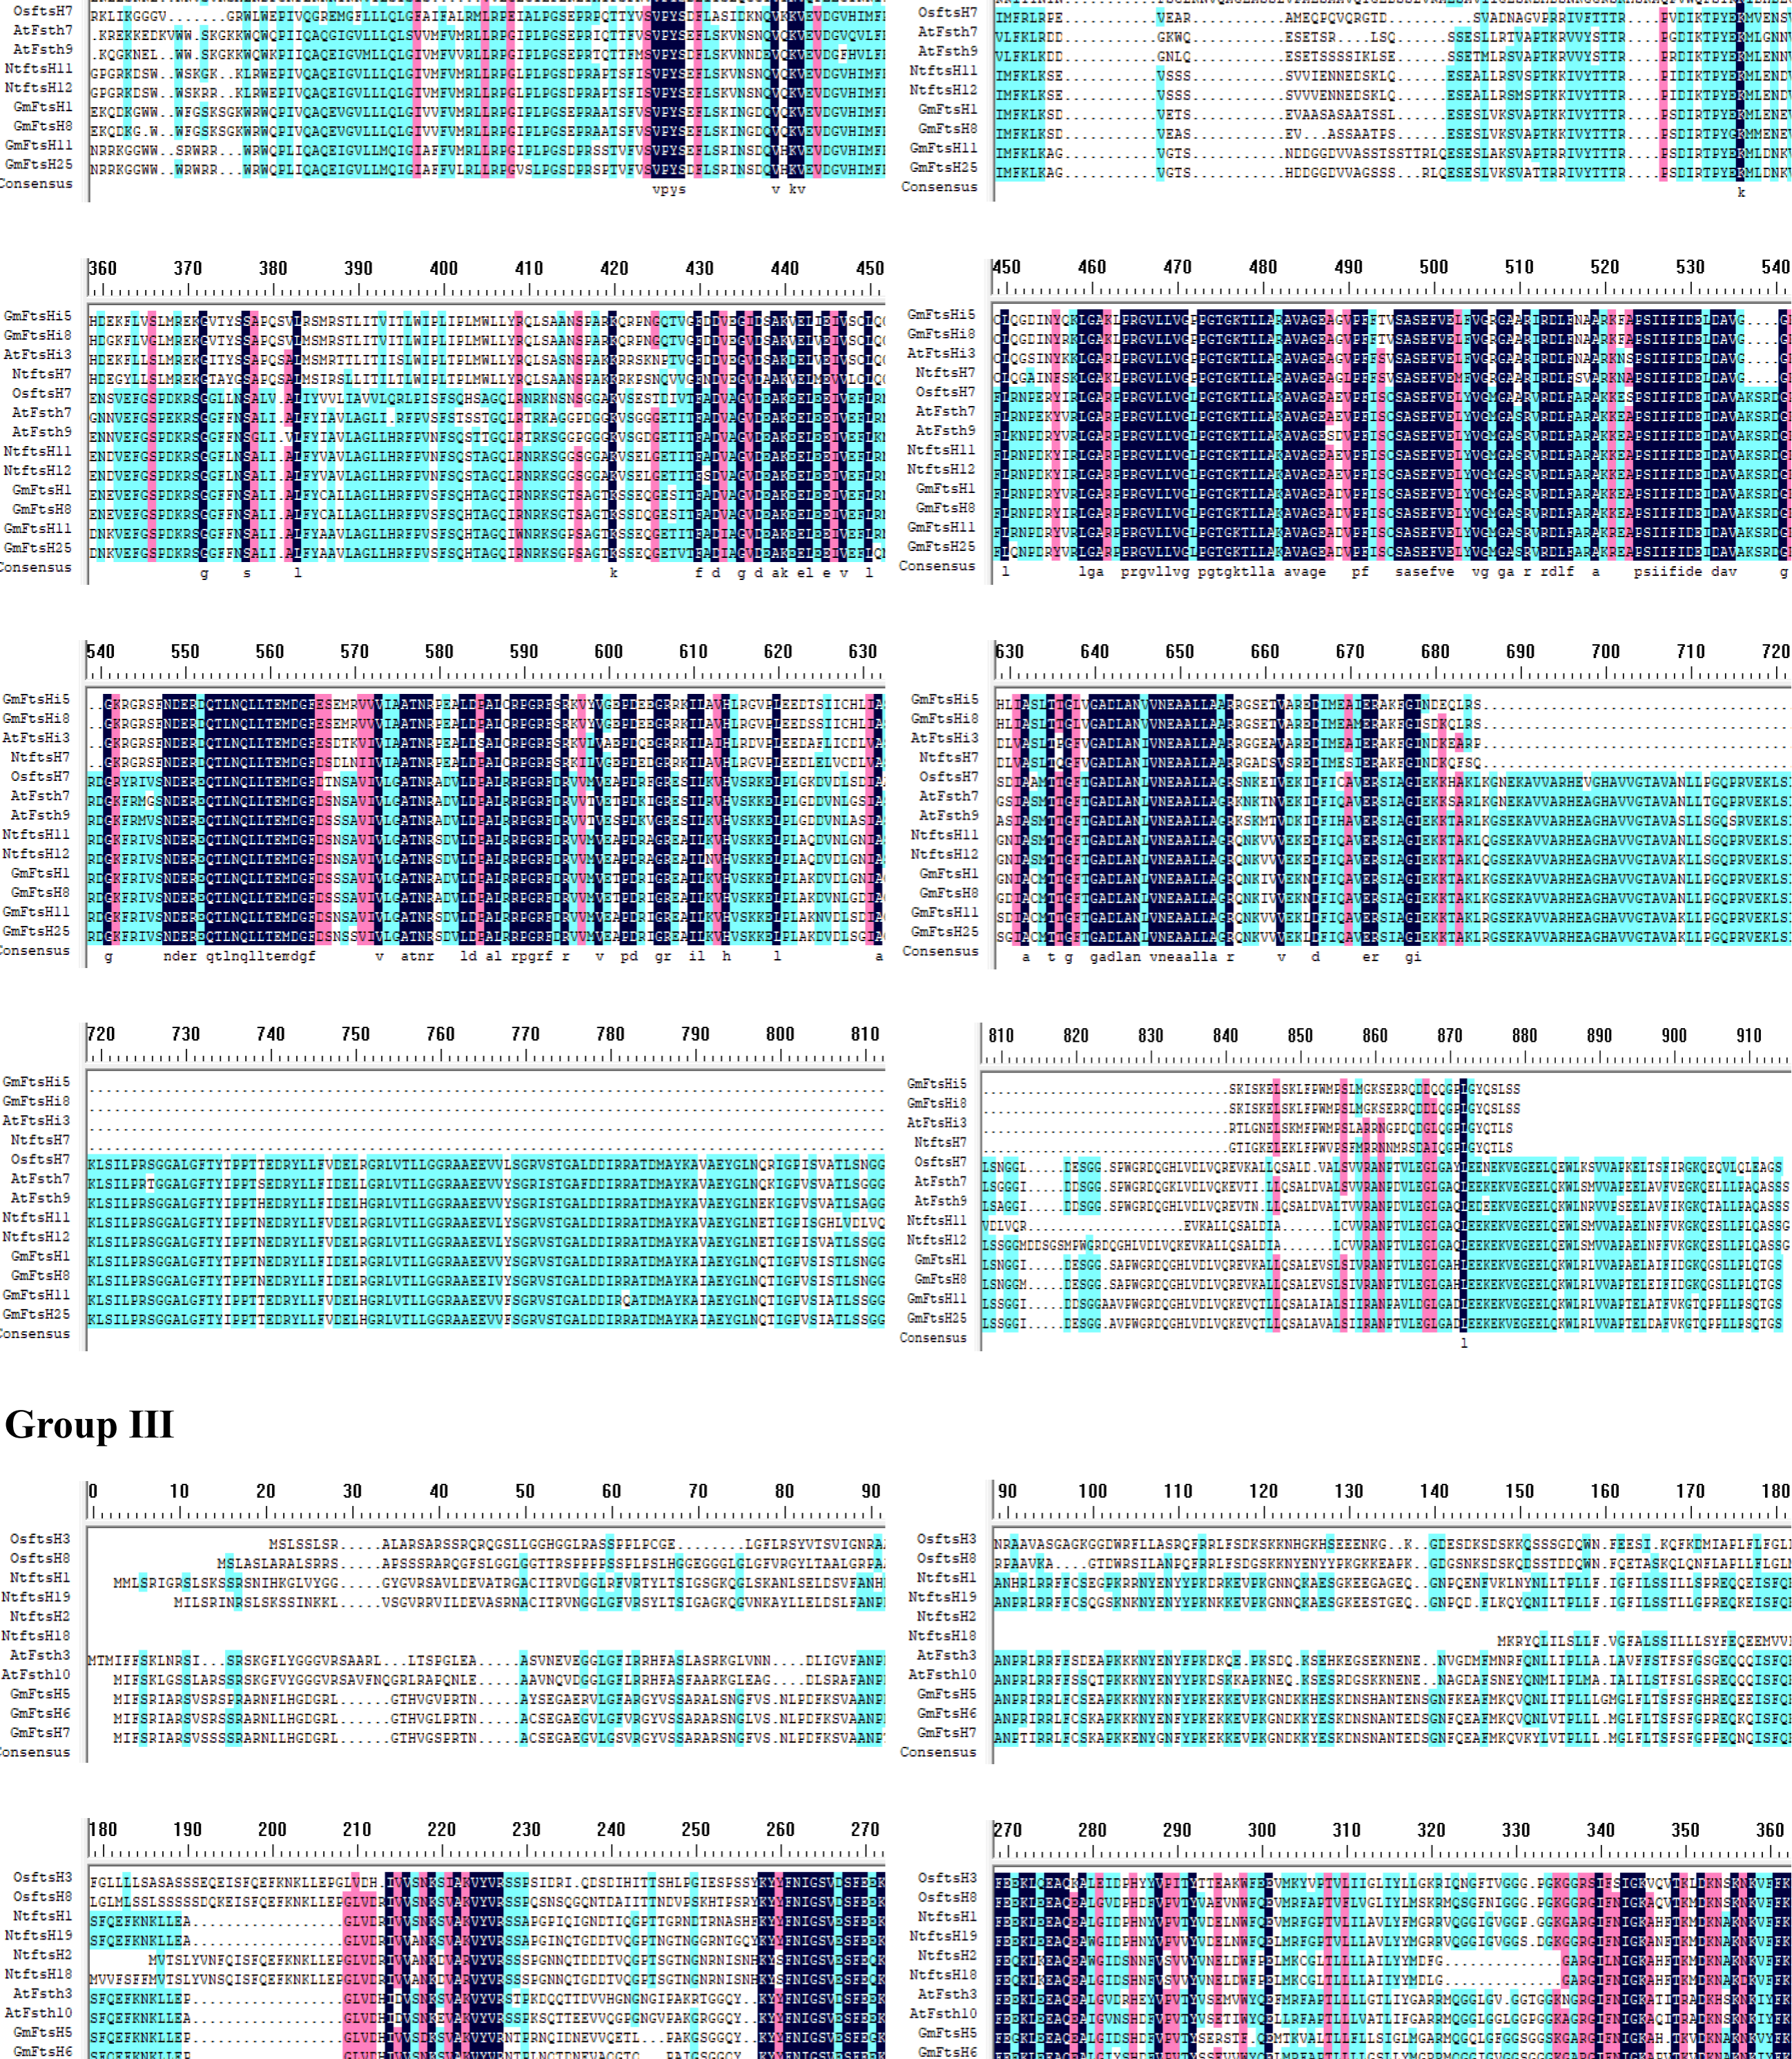

GmFtsH7  
Consensus

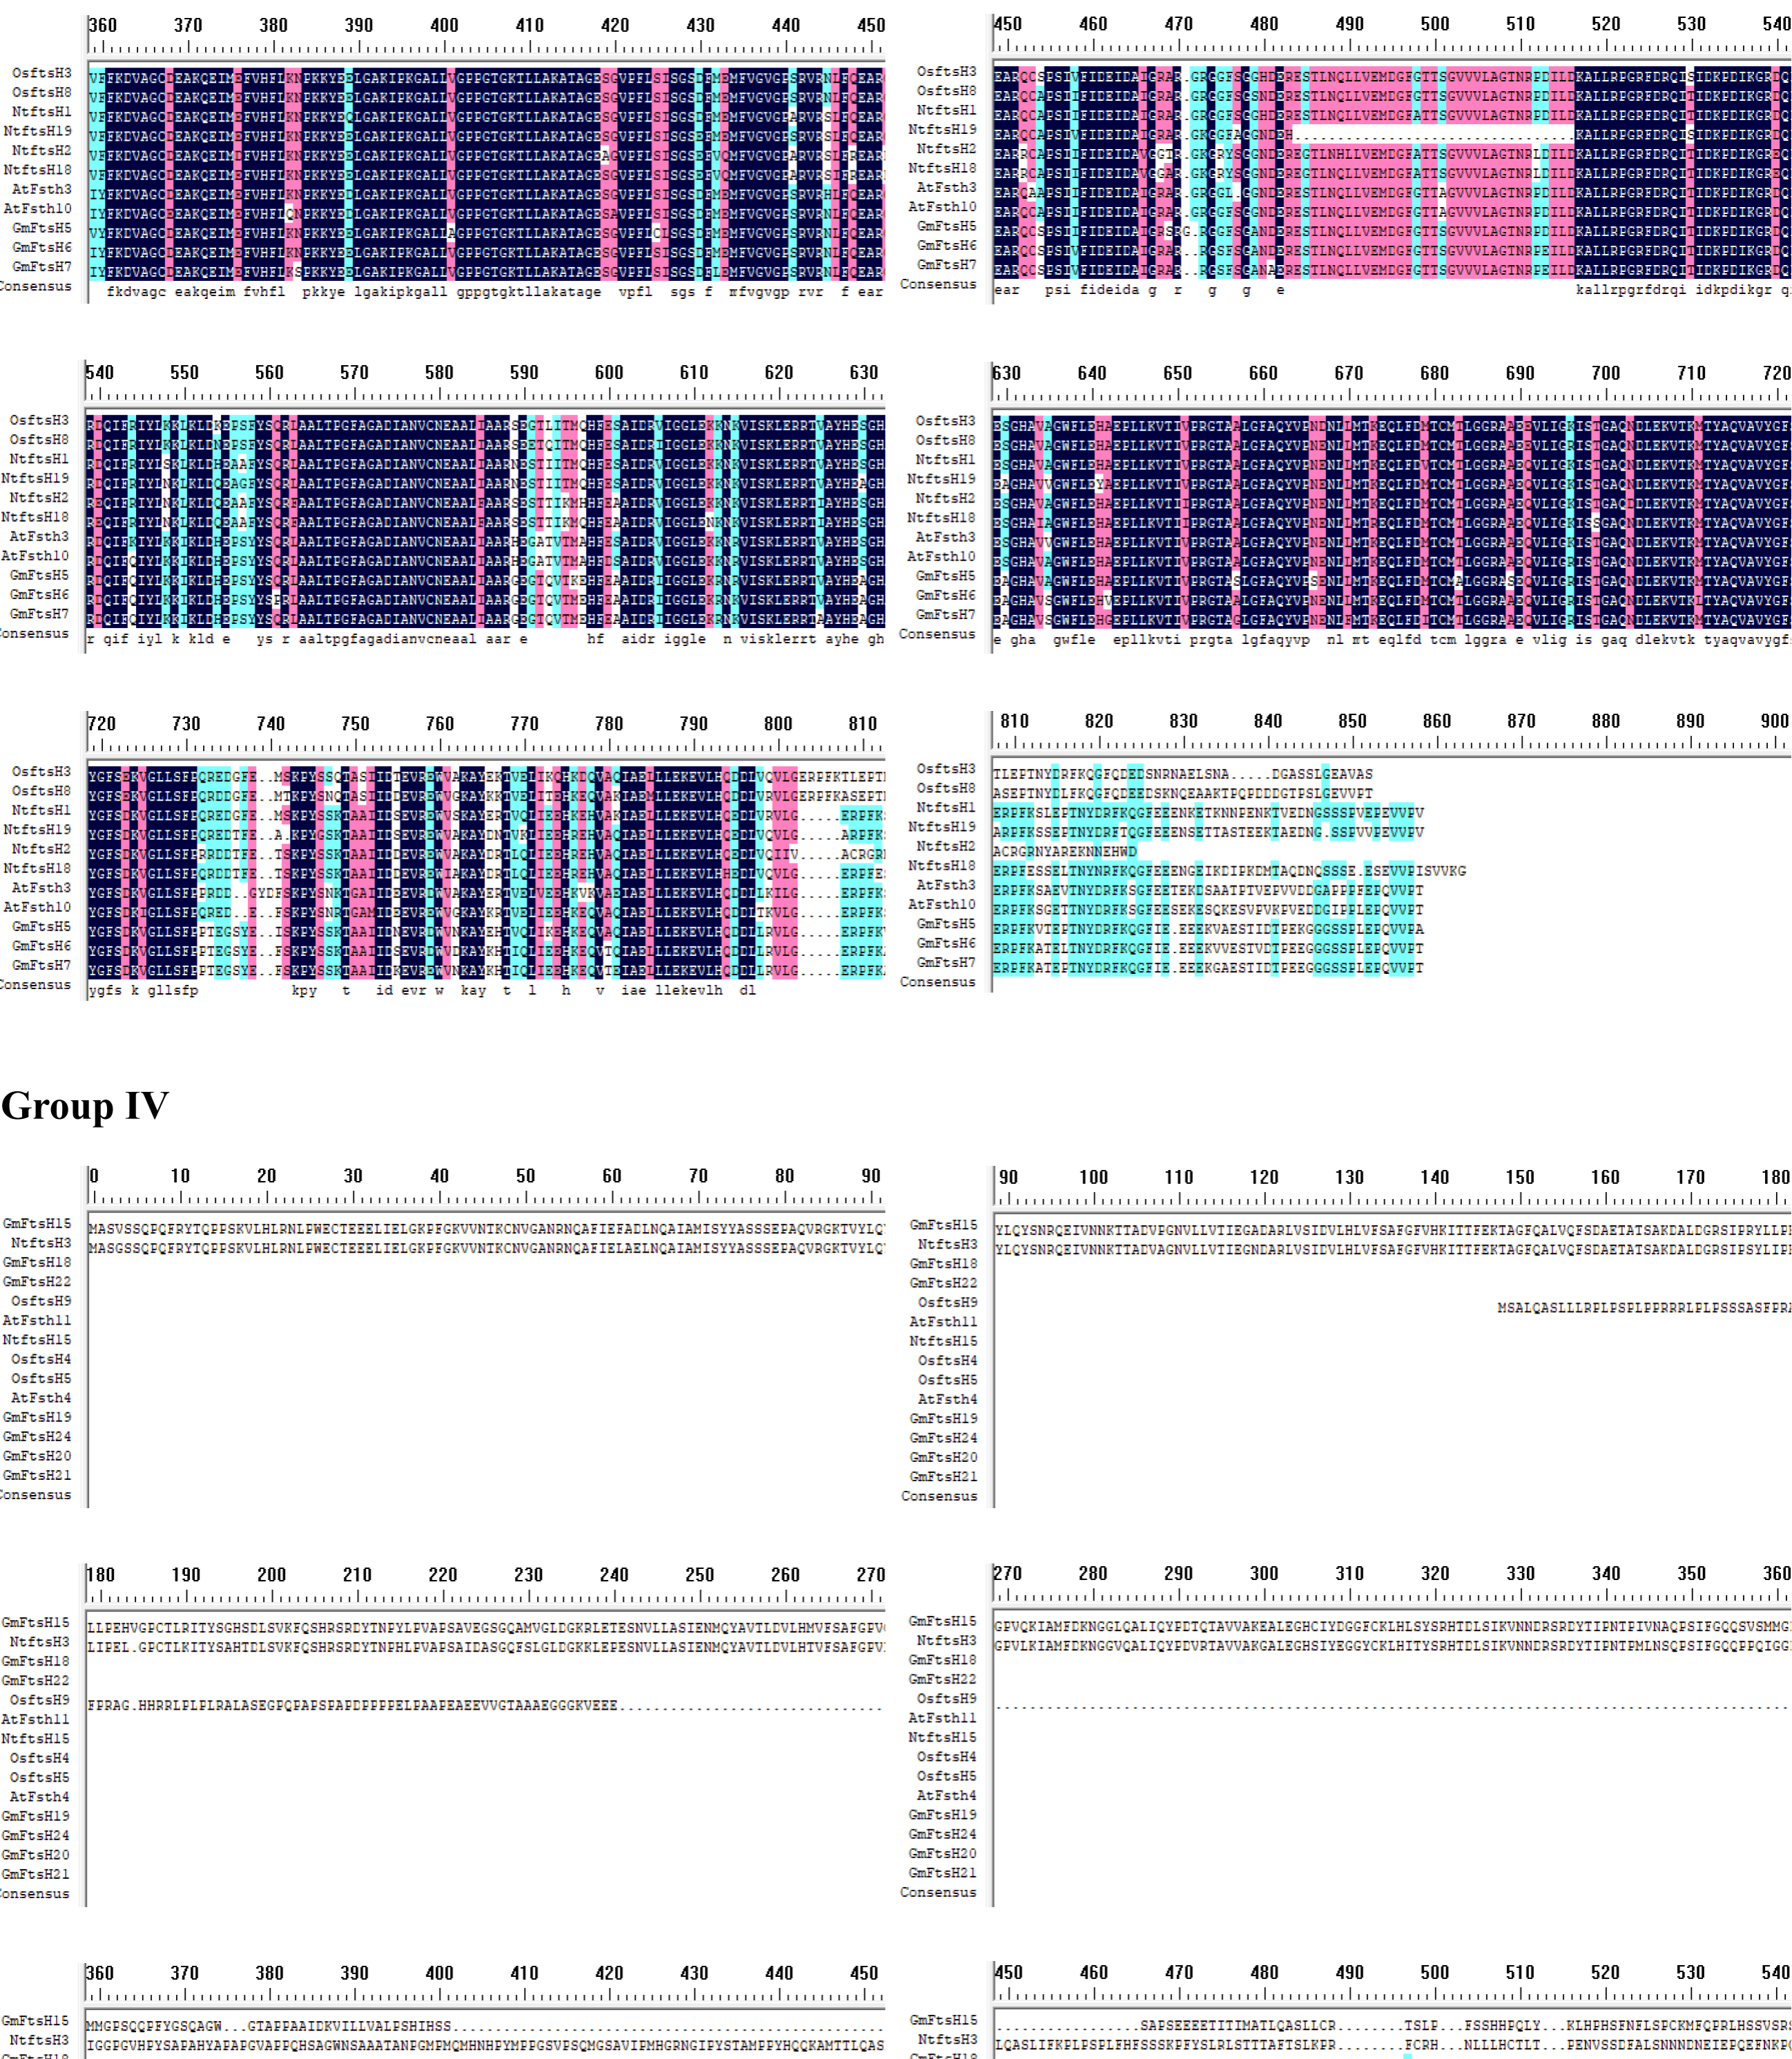

CaFtsH22  
OaftsH9  
AtFtsH11  
NtftsH15

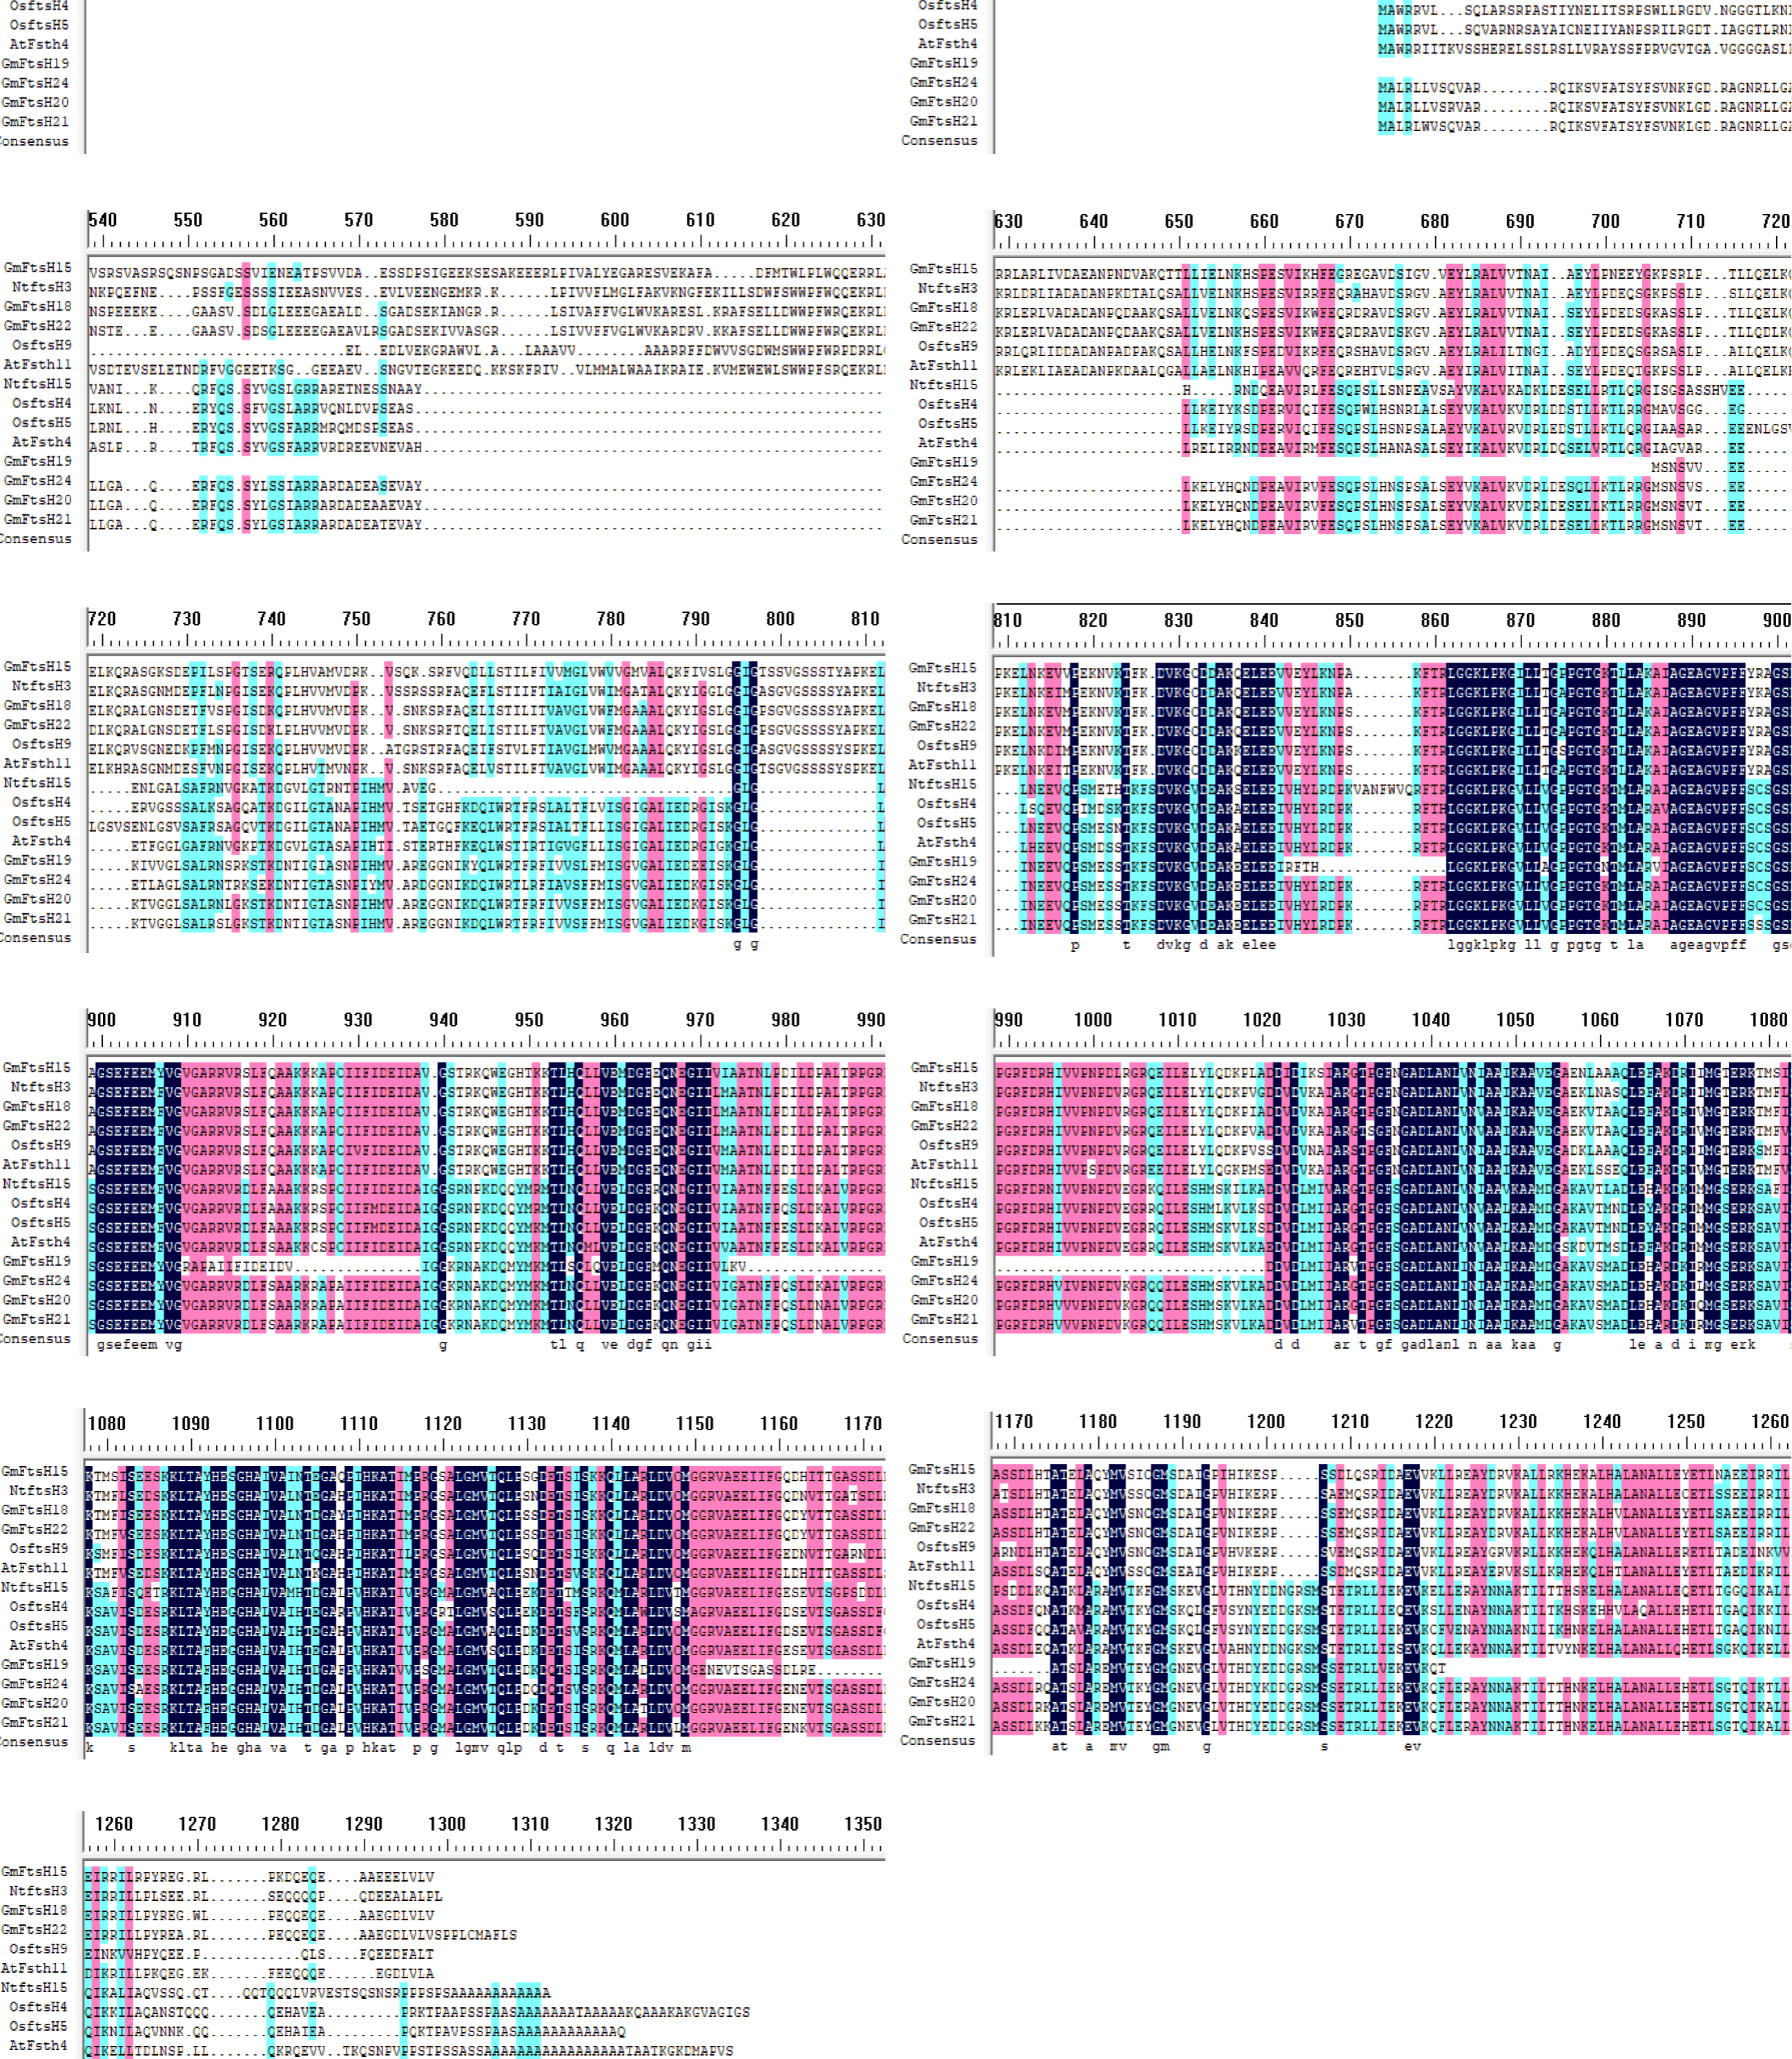

|           |            |
|-----------|------------|
| GmFtsH19  |            |
| GmFtsH24  | QIKTLLACVR |
| GmFtsH20  | QIKALLACVR |
| GmFtsH21  | QIKALLACVR |
| consensus |            |

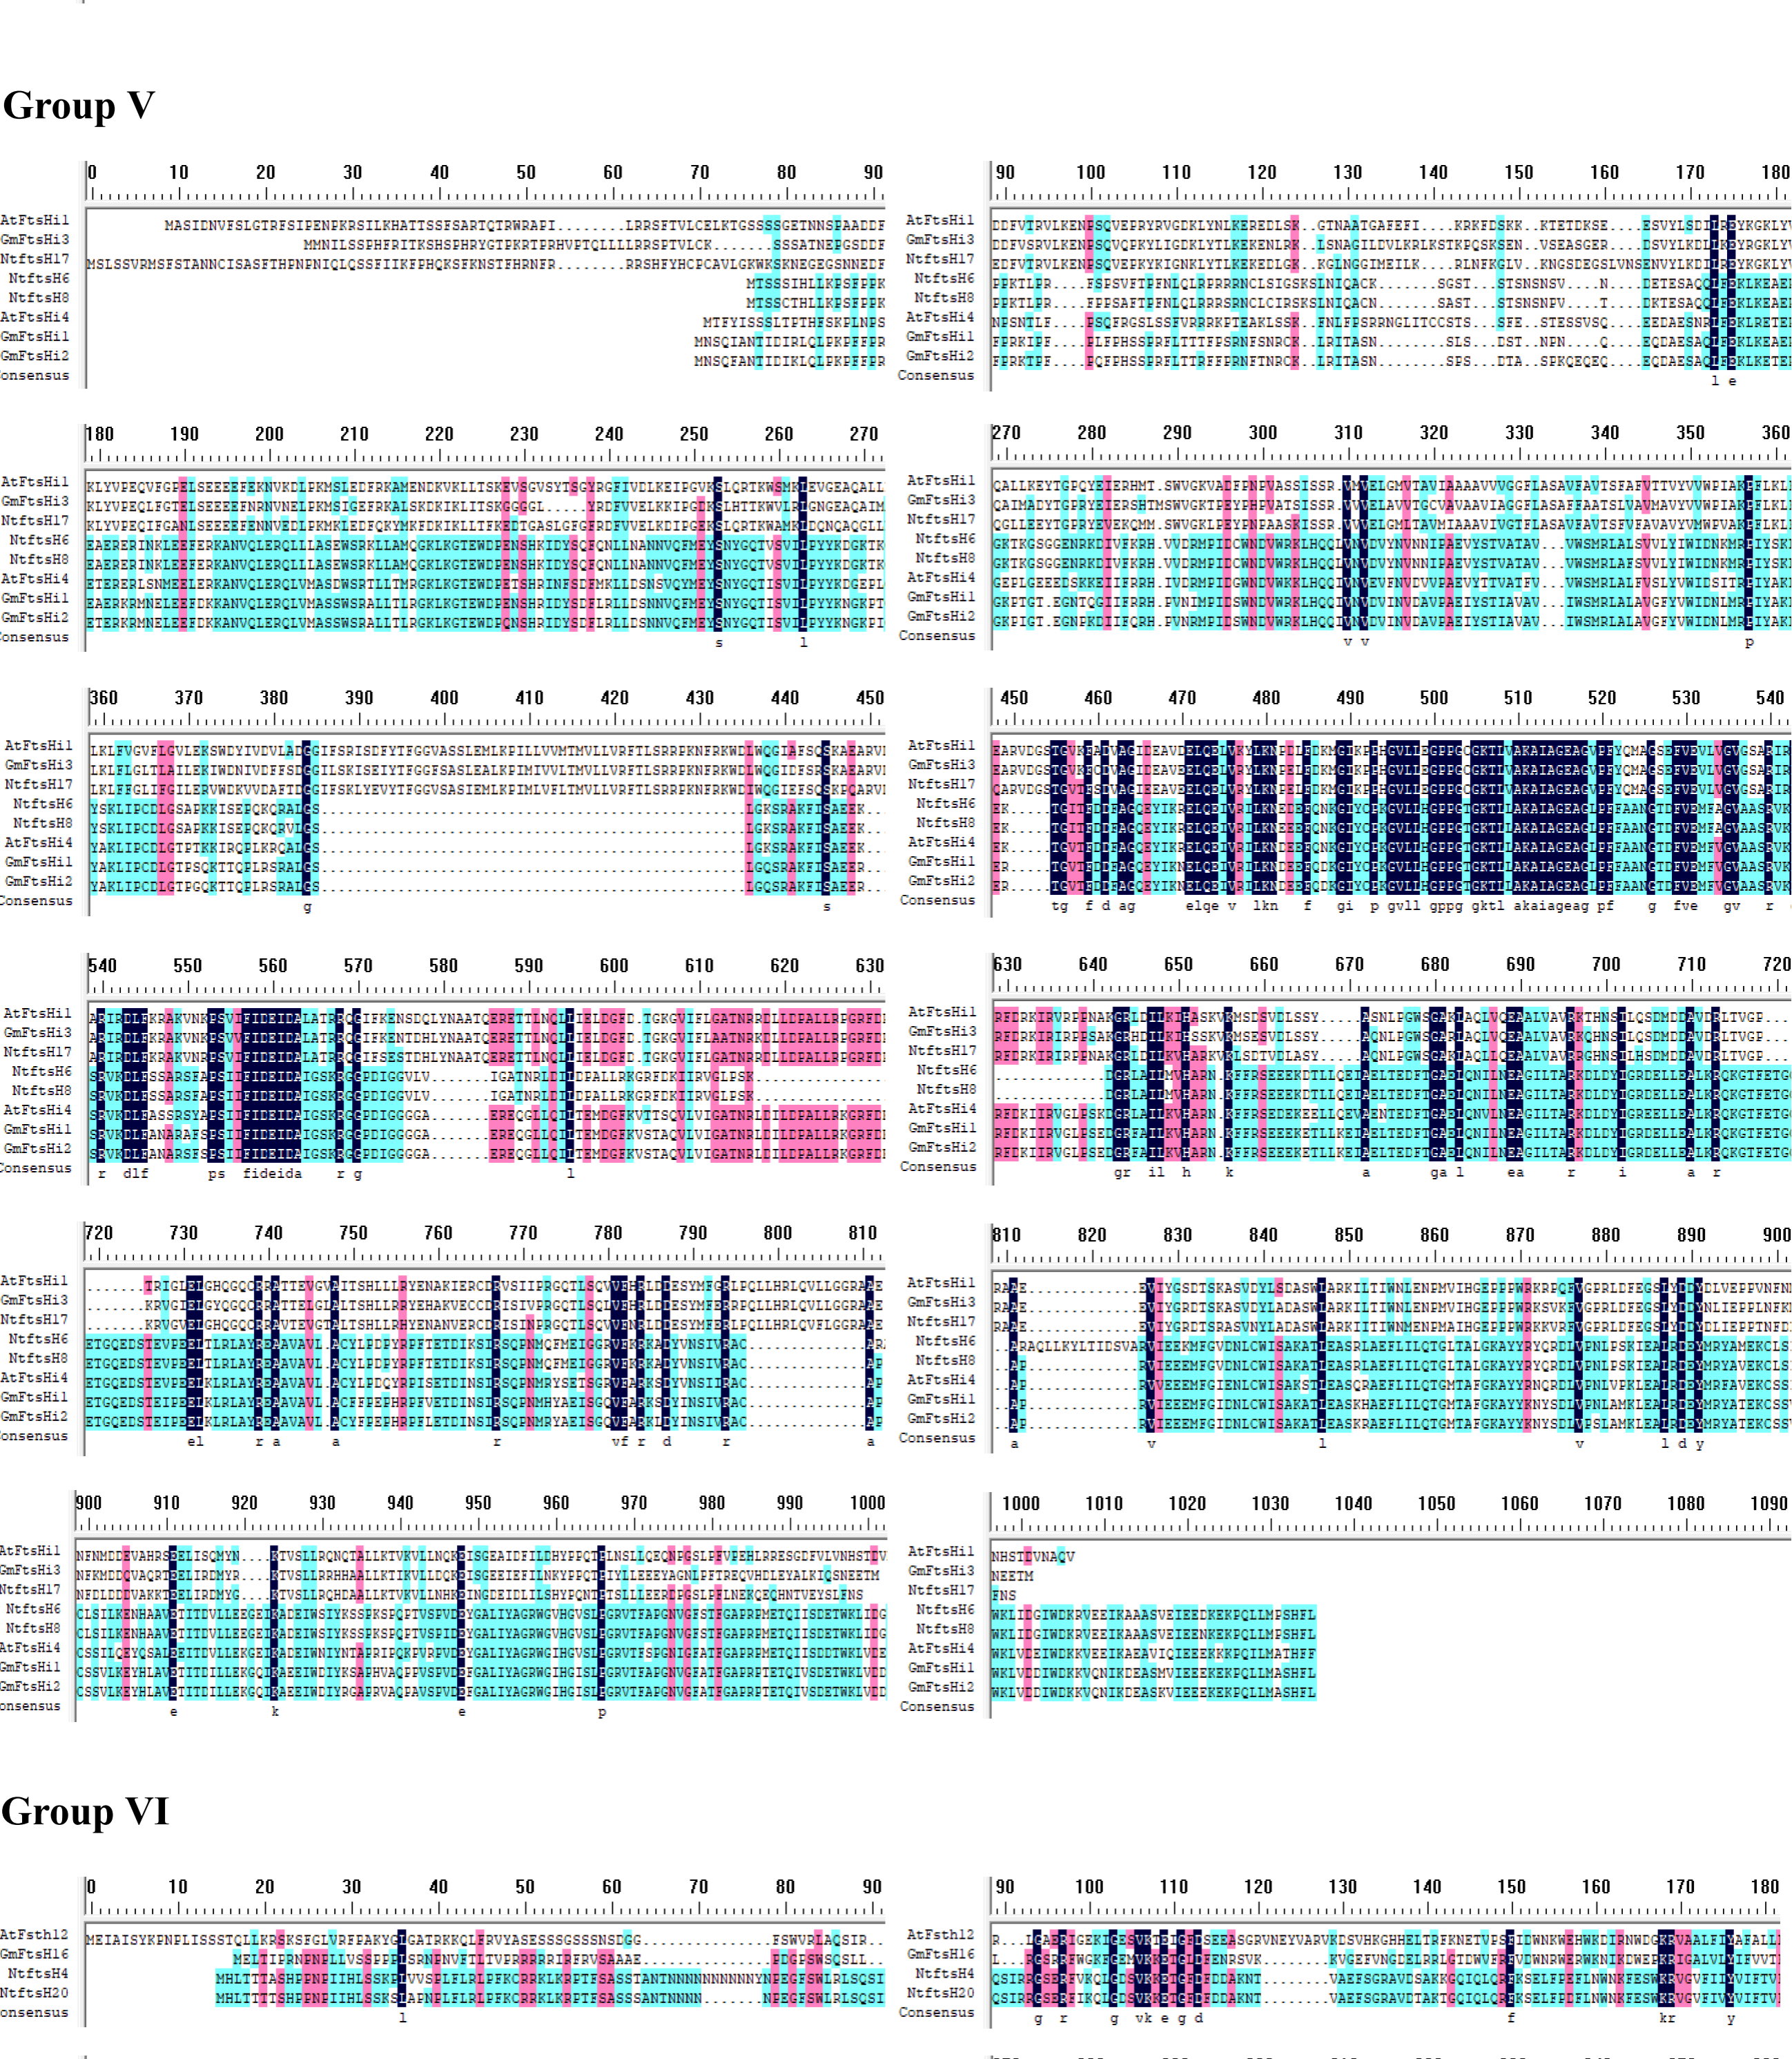

180  
 AaFtsH12  
 CnFtsH16  
 NcFtsH16

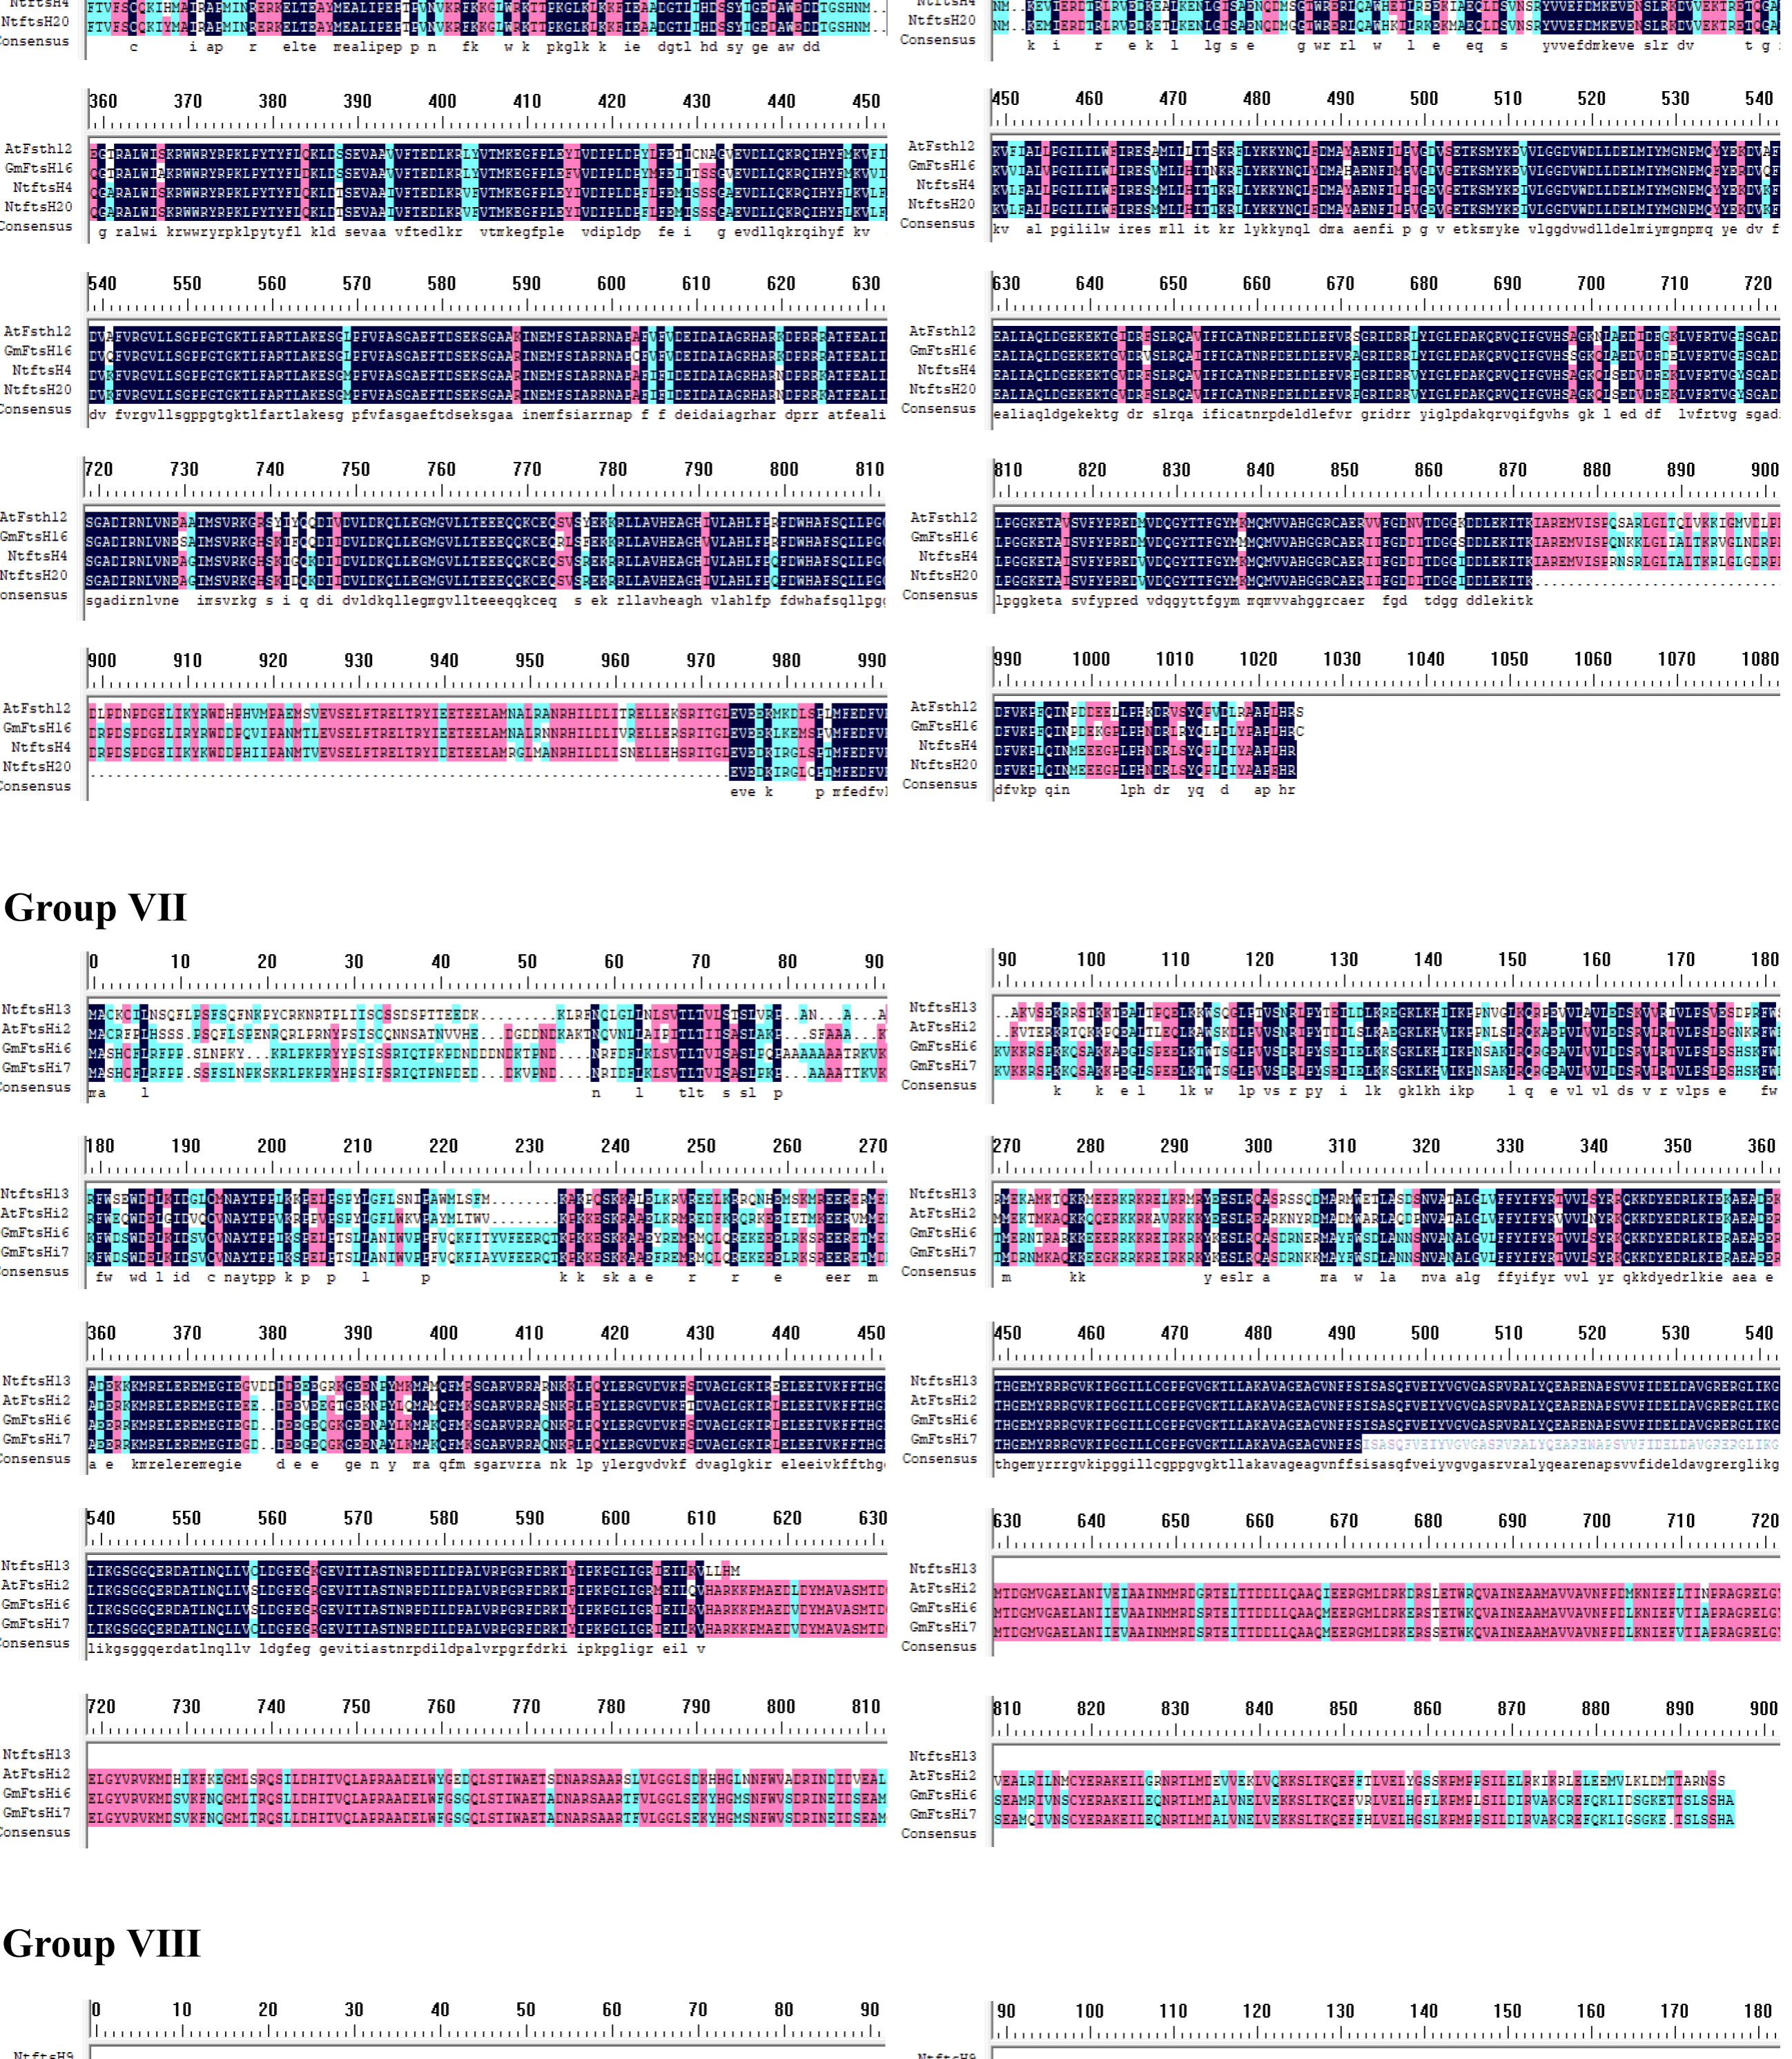

|           |           |
|-----------|-----------|
| AtFtsHi5  | MDTISASSL |
| GmFtsHi4  |           |
| GmFtsHi5  |           |
| Consensus |           |

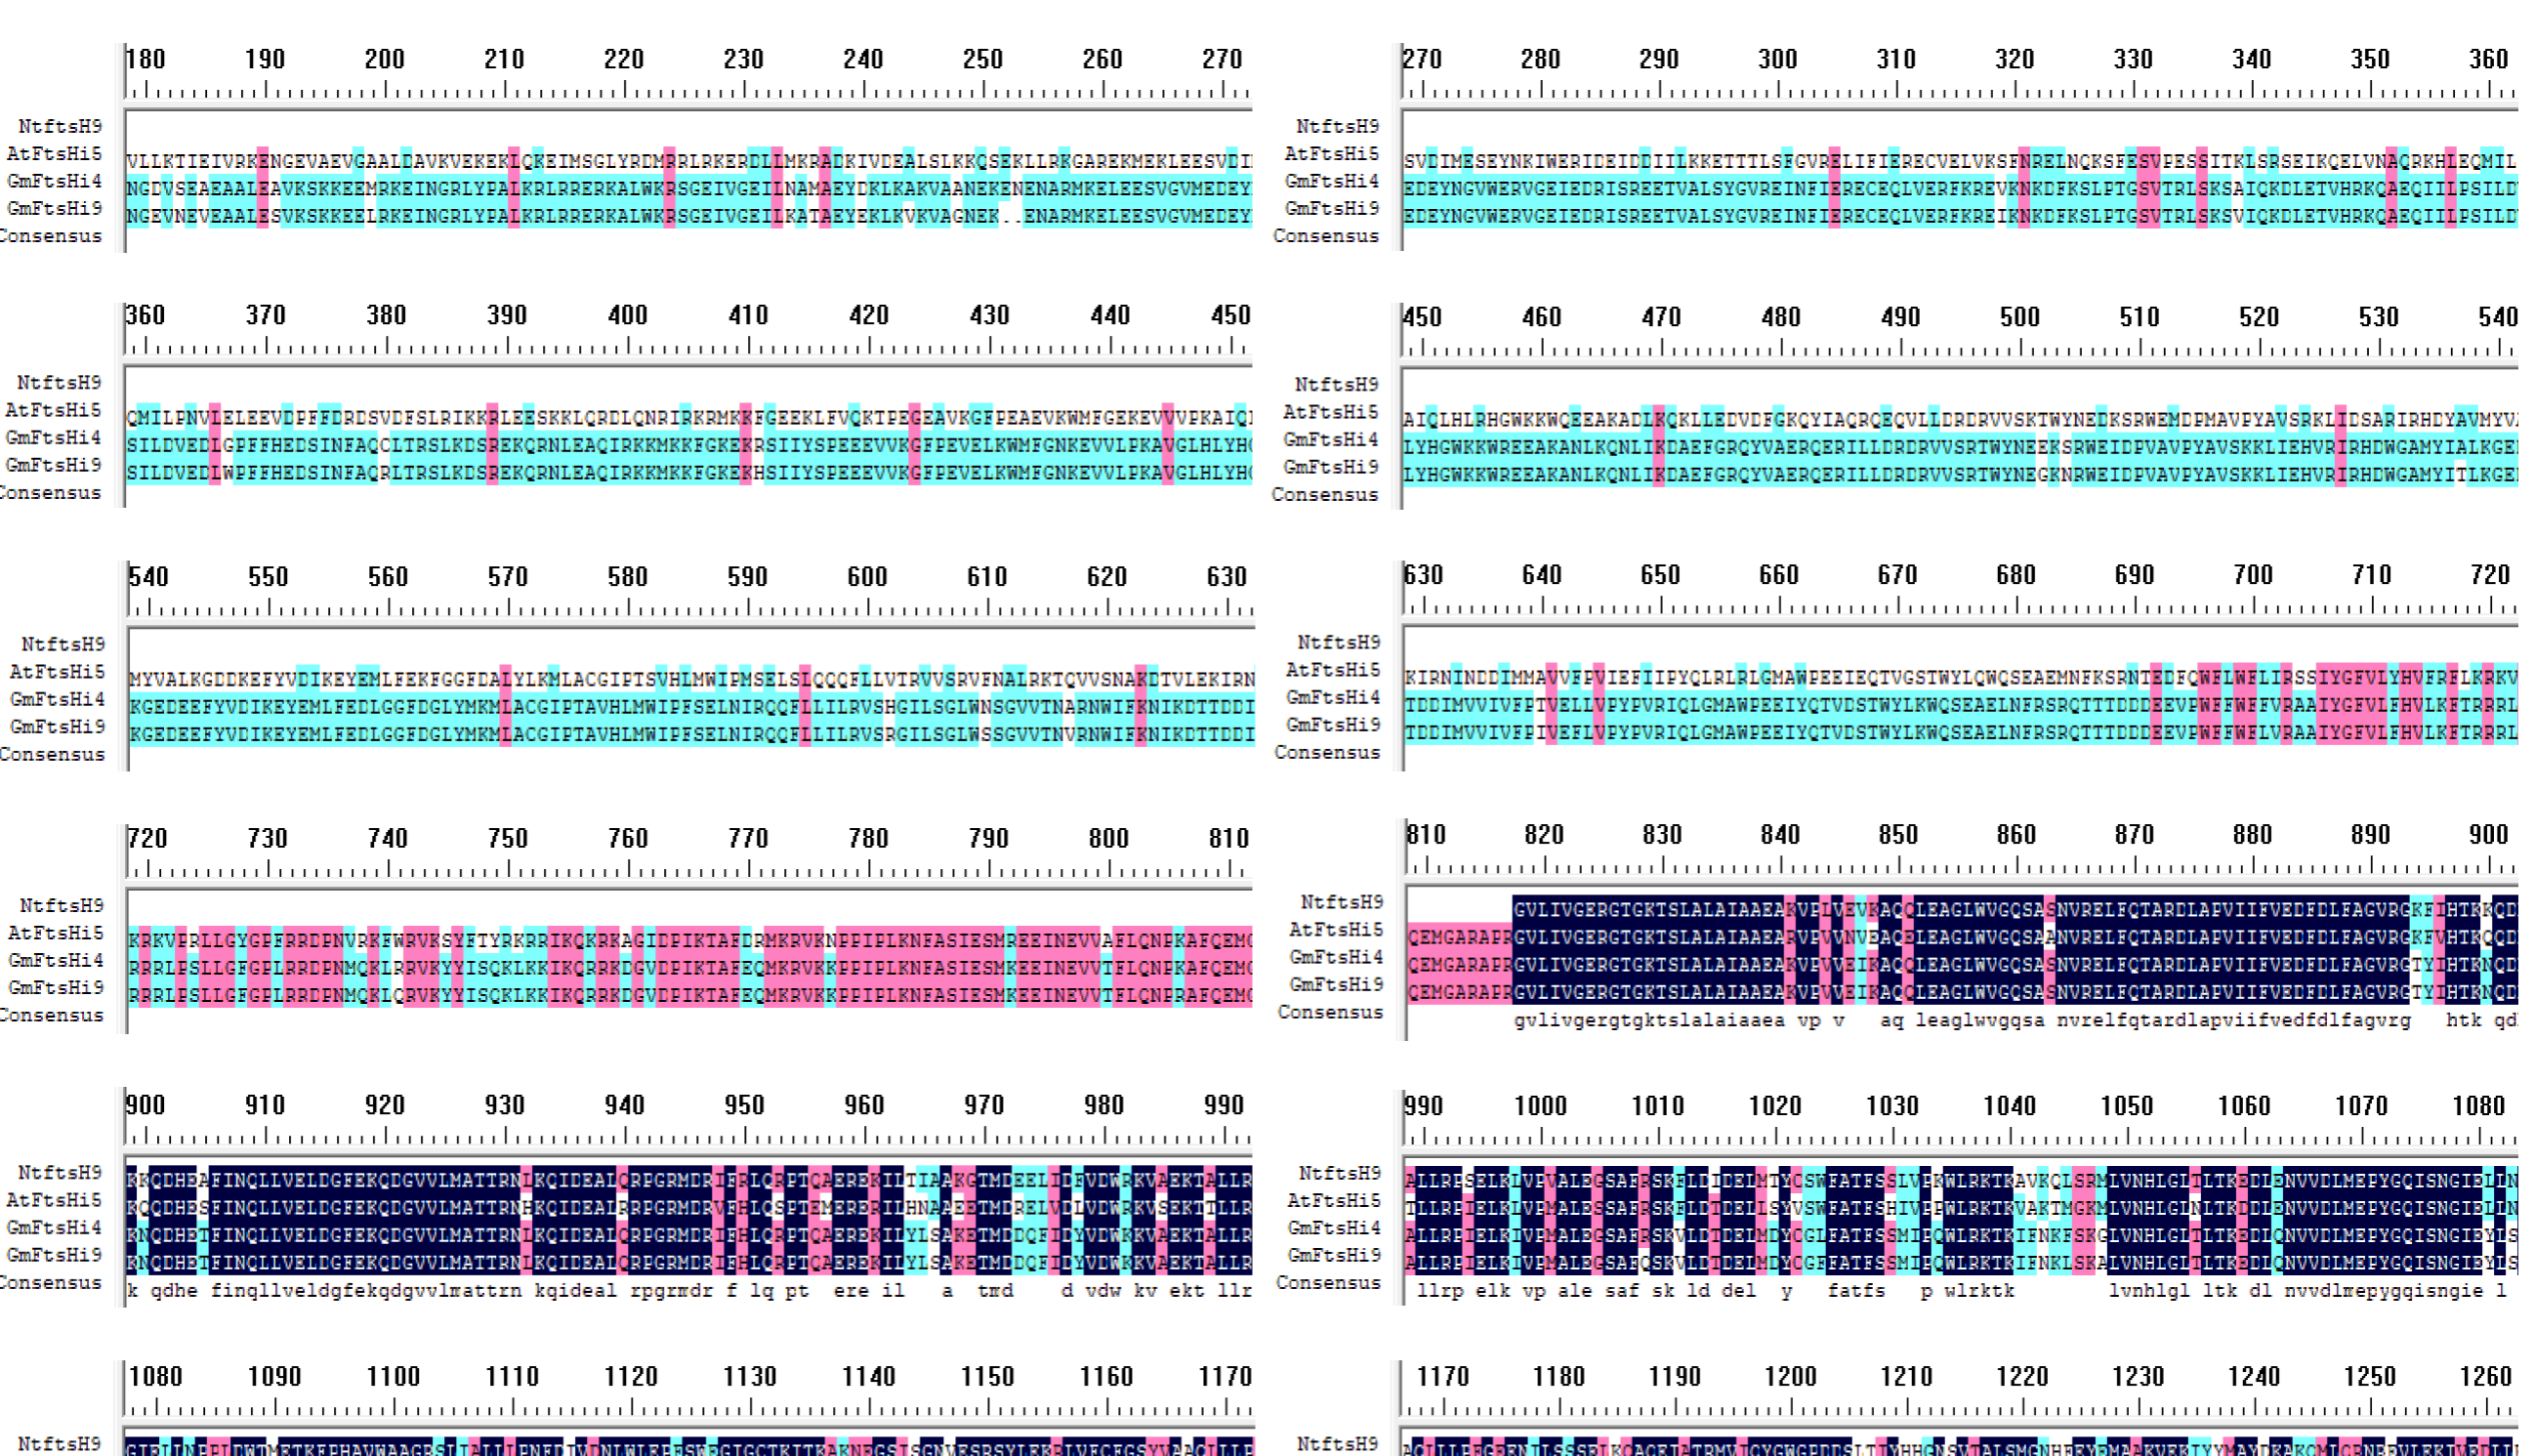

|           |                   |
|-----------|-------------------|
| AtFtsK15  | C I E L L N F T V |
| GmFtsK14  | C I E Y L S P P L |
| GmFtsK19  | C I E Y L S P P L |
| Consensus | q i e l p c       |

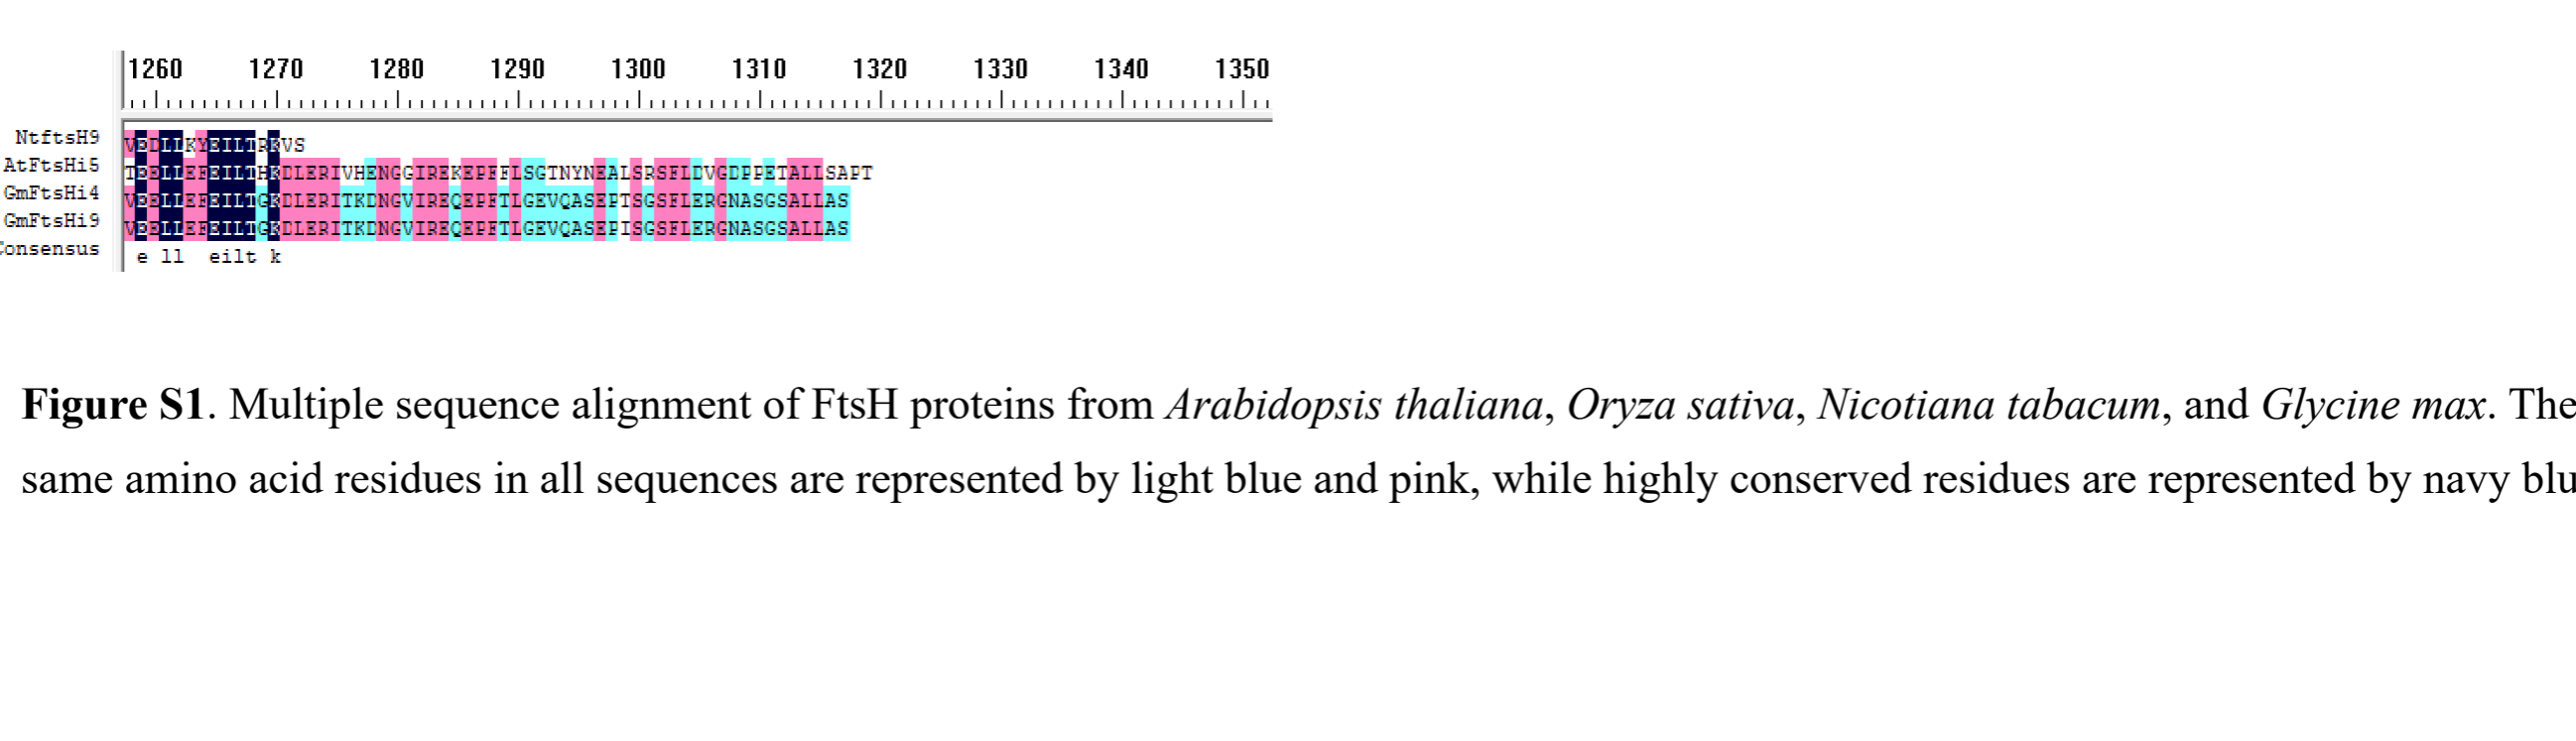

Supplement: Supplementary file 1 [file ijms-24-16996-s001.zip › Figure S1.pdf]
