# Supplementary material for: Genome-Wide Identification and Comprehensive Analysis of the FtsH Gene Family in Soybean (Glycine max)
Source: Int J Mol Sci. 2023 Nov 30;24(23):16996. doi: 10.3390/ijms242316996 (PMC10707429; doi:10.3390/ijms242316996)
Supplement: Supplementary file 1 [file ijms-24-16996-s001.zip › Table S1.xlsx]

## Sheet: Sheet1
Critical cis-regulatory elements distributed in the promoter of GmFtsH genes
Gene name	Elements	Sequence	Position	Length	orientation	Species	Function
GmFtsH1	LTR	CCGAAA	14	6	+	Hordeum vulgare	cis-acting element involved in low-temperature responsiveness
GmFtsH1	LTR	CCGAAA	950	6	-	Hordeum vulgare	cis-acting element involved in low-temperature responsiveness
GmFtsH1	LTR	CCGAAA	1833	6	+	Hordeum vulgare	cis-acting element involved in low-temperature responsiveness
GmFtsH1	LTR	CCGAAA	1839	6	+	Hordeum vulgare	cis-acting element involved in low-temperature responsiveness
GmFtsH1	O2-site	GTTGACGTGA	1670	9	-	Zea mays	cis-acting regulatory element involved in zein metabolism regulation
GmFtsH1	O2-site	GATGATGTGG	1681	9	-	Zea mays	cis-acting regulatory element involved in zein metabolism regulation
GmFtsH1	AT~TATA-box	TATATA	1129	6	-	Arabidopsis thaliana
GmFtsH1	CCAAT-box	CAACGG	563	6	-	Hordeum vulgare	MYBHv1 binding site
GmFtsH1	CCAAT-box	CAACGG	1889	6	-	Hordeum vulgare	MYBHv1 binding site
GmFtsH1	CCAAT-box	CAACGG	1918	6	+	Hordeum vulgare	MYBHv1 binding site
GmFtsH1	ARE	AAACCA	1842	6	+	Zea mays	cis-acting regulatory element essential for the anaerobic induction
GmFtsH1	ARE	AAACCA	1868	6	+	Zea mays	cis-acting regulatory element essential for the anaerobic induction
GmFtsH1	TATC-box	TATCCCA	1024	7	-	Oryza sativa	cis-acting element involved in gibberellin-responsiveness
GmFtsH1	Myb	CAACTG	756	6	+	Arabidopsis thaliana
GmFtsH1	Myb	TAACTG	942	6	+	Arabidopsis thaliana
GmFtsH1	MBSI	TTTTTACGGTTA	685	11	-	Petunia hybrida	MYB binding site involved in flavonoid biosynthetic genes regulation
GmFtsH1	MBS	CAACTG	756	6	+	Arabidopsis thaliana	MYB binding site involved in drought-inducibility
GmFtsH1	TATA-box	TATA	152	4	+	Arabidopsis thaliana	core promoter element around -30 of transcription start
GmFtsH1	TATA-box	TATAAAA	265	7	-	Pisum sativum	core promoter element around -30 of transcription start
GmFtsH1	TATA-box	TATAAA	266	6	-	Helianthus annuus	core promoter element around -30 of transcription start
GmFtsH1	TATA-box	TATAA	267	5	-	Arabidopsis thaliana	core promoter element around -30 of transcription start
GmFtsH1	TATA-box	TATA	268	4	+	Arabidopsis thaliana	core promoter element around -30 of transcription start
GmFtsH1	TATA-box	TATACA	305	6	-	Helianthus annuus	core promoter element around -30 of transcription start
GmFtsH1	TATA-box	TATA	307	4	+	Arabidopsis thaliana	core promoter element around -30 of transcription start
GmFtsH1	TATA-box	TATA	540	4	+	Arabidopsis thaliana	core promoter element around -30 of transcription start
GmFtsH1	TATA-box	TATA	573	4	+	Arabidopsis thaliana	core promoter element around -30 of transcription start
GmFtsH1	TATA-box	ccTATAAAaa	627	9	-	Arabidopsis thaliana	core promoter element around -30 of transcription start
GmFtsH1	TATA-box	TATAAAA	628	7	-	Pisum sativum	core promoter element around -30 of transcription start
GmFtsH1	TATA-box	TATAAA	629	6	-	Helianthus annuus	core promoter element around -30 of transcription start
GmFtsH1	TATA-box	TATAA	630	5	-	Arabidopsis thaliana	core promoter element around -30 of transcription start
GmFtsH1	TATA-box	TATA	631	4	+	Arabidopsis thaliana	core promoter element around -30 of transcription start
GmFtsH1	TATA-box	TATA	764	4	+	Arabidopsis thaliana	core promoter element around -30 of transcription start
GmFtsH1	TATA-box	TATAA	811	5	-	Arabidopsis thaliana	core promoter element around -30 of transcription start
GmFtsH1	TATA-box	TATA	812	4	+	Arabidopsis thaliana	core promoter element around -30 of transcription start
GmFtsH1	TATA-box	TACATAAA	1051	8	+	Oryza sativa	core promoter element around -30 of transcription start
GmFtsH1	TATA-box	TACAAAA	1060	7	-	Oryza sativa	core promoter element around -30 of transcription start
GmFtsH1	TATA-box	ATATAA	1108	6	+	Brassica oleracea	core promoter element around -30 of transcription start
GmFtsH1	TATA-box	TATA	1109	4	-	Arabidopsis thaliana	core promoter element around -30 of transcription start
GmFtsH1	TATA-box	TATATA	1129	6	-	Arabidopsis thaliana	core promoter element around -30 of transcription start
GmFtsH1	TATA-box	TATA	1131	4	-	Arabidopsis thaliana	core promoter element around -30 of transcription start
GmFtsH1	TATA-box	ATATAA	1152	6	+	Brassica oleracea	core promoter element around -30 of transcription start
GmFtsH1	TATA-box	TATA	1153	4	-	Arabidopsis thaliana	core promoter element around -30 of transcription start
GmFtsH1	TATA-box	TATAAAA	1161	7	-	Pisum sativum	core promoter element around -30 of transcription start
GmFtsH1	TATA-box	TATAAA	1162	6	-	Helianthus annuus	core promoter element around -30 of transcription start
GmFtsH1	TATA-box	TATAA	1163	5	-	Arabidopsis thaliana	core promoter element around -30 of transcription start
GmFtsH1	TATA-box	TATA	1164	4	-	Arabidopsis thaliana	core promoter element around -30 of transcription start
GmFtsH1	TATA-box	ccTATAAAaa	1233	9	+	Arabidopsis thaliana	core promoter element around -30 of transcription start
GmFtsH1	TATA-box	TATA	1235	4	-	Arabidopsis thaliana	core promoter element around -30 of transcription start
GmFtsH1	TATA-box	TATAA	1358	5	-	Arabidopsis thaliana	core promoter element around -30 of transcription start
GmFtsH1	TATA-box	TATA	1359	4	-	Arabidopsis thaliana	core promoter element around -30 of transcription start
GmFtsH1	TATA-box	ATATAA	1548	6	+	Brassica oleracea	core promoter element around -30 of transcription start
GmFtsH1	TATA-box	TATA	1549	4	-	Arabidopsis thaliana	core promoter element around -30 of transcription start
GmFtsH1	TATA-box	ATTATA	2012	6	+	Brassica napus	core promoter element around -30 of transcription start
GmFtsH1	TATA-box	TATAA	2013	5	-	Arabidopsis thaliana	core promoter element around -30 of transcription start
GmFtsH1	TATA-box	TATA	2014	4	-	Arabidopsis thaliana	core promoter element around -30 of transcription start
GmFtsH1	TATA-box	ATATAA	2032	6	+	Brassica oleracea	core promoter element around -30 of transcription start
GmFtsH1	TATA-box	TATA	2033	4	-	Arabidopsis thaliana	core promoter element around -30 of transcription start
GmFtsH1	G-Box	CACGTG	1725	6	-	Pisum sativum	cis-acting regulatory element involved in light responsiveness
GmFtsH1	TCT-motif	TCTTAC	1715	6	+	Arabidopsis thaliana	part of a light responsive element
GmFtsH1	Box 4	ATTAAT	828	6	+	Petroselinum crispum	part of a conserved DNA module involved in light responsiveness
GmFtsH1	Box 4	ATTAAT	1093	6	-	Petroselinum crispum	part of a conserved DNA module involved in light responsiveness
GmFtsH1	Box 4	ATTAAT	1383	6	-	Petroselinum crispum	part of a conserved DNA module involved in light responsiveness
GmFtsH1	Box 4	ATTAAT	2038	6	-	Petroselinum crispum	part of a conserved DNA module involved in light responsiveness
GmFtsH1	MSA-like	(T/C)C(T/C)AACGG(T/C)(T/C)A	1916	9	+	Catharanthus roseus	cis-acting element involved in cell cycle regulation
GmFtsH1	STRE	AGGGG	323	5	-	Arabidopsis thaliana
GmFtsH1	CGTCA-motif	CGTCA	1673	5	+	Hordeum vulgare	cis-acting regulatory element involved in the MeJA-responsiveness
GmFtsH1	MYB	CAACCA	618	6	-	Arabidopsis thaliana
GmFtsH1	MYB	CAACCA	1796	6	+	Arabidopsis thaliana
GmFtsH1	MYB	TAACCA	1813	6	+	Arabidopsis thaliana
GmFtsH1	MYB-like sequence	TAACCA	1813	6	+	Arabidopsis thaliana
GmFtsH1	LAMP-element	CTTTATCA	907	8	-	Pisum sativum	part of a light responsive element
GmFtsH1	TATA	TATAAAAT	627	8	-	Arabidopsis thaliana
GmFtsH1	TATA	TATAAAAT	812	8	+	Arabidopsis thaliana
GmFtsH1	TATA	TATAAAAT	1160	8	-	Arabidopsis thaliana
GmFtsH1	MYC	CATTTG	20	6	-	Arabidopsis thaliana
GmFtsH1	MYC	CATTTG	56	6	-	Arabidopsis thaliana
GmFtsH1	MYC	CATTTG	189	6	+	Arabidopsis thaliana
GmFtsH1	MYC	CATTTG	289	6	-	Arabidopsis thaliana
GmFtsH1	MYC	CATTTG	552	6	-	Arabidopsis thaliana
GmFtsH1	MYC	CATTTG	677	6	+	Arabidopsis thaliana
GmFtsH1	MYC	CATTTG	1528	6	+	Arabidopsis thaliana
GmFtsH1	GT1-motif	GGTTAA	382	6	+	Arabidopsis thaliana	light responsive element
GmFtsH1	GT1-motif	GGTTAA	1135	6	+	Arabidopsis thaliana	light responsive element
GmFtsH1	TC-rich repeats	ATTCTCTAAC	142	9	+	Nicotiana tabacum	cis-acting element involved in defense and stress responsiveness
GmFtsH1	GTGGC-motif	GATTCTGTGGC	1680	10	-	Spinacia oleracea	part of a light responsive element
GmFtsH1	TGACG-motif	TGACG	1673	5	-	Hordeum vulgare	cis-acting regulatory element involved in the MeJA-responsiveness
GmFtsH1	RY-element	CATGCATG	181	8	+	Helianthus annuus	cis-acting regulatory element involved in seed-specific regulation
GmFtsH1	AT-rich element	ATAGAAATCAA	440	10	+	Glycine max	binding site of AT-rich DNA binding protein (ATBP-1)
GmFtsH1	ABRE	ACGTG	1671	5	-	Arabidopsis thaliana	cis-acting element involved in the abscisic acid responsiveness
GmFtsH1	ABRE	CACGTG	1725	6	-	Arabidopsis thaliana	cis-acting element involved in the abscisic acid responsiveness
GmFtsH1	ABRE	ACGTG	1726	5	+	Arabidopsis thaliana	cis-acting element involved in the abscisic acid responsiveness
GmFtsH1	ABRE	ACGTG	1928	5	-	Arabidopsis thaliana	cis-acting element involved in the abscisic acid responsiveness
GmFtsH1	ABRE	ACGTG	2083	5	-	Arabidopsis thaliana	cis-acting element involved in the abscisic acid responsiveness
GmFtsH1	MYB recognition site	CCGTTG	563	6	+	Arabidopsis thaliana
GmFtsH1	MYB recognition site	CCGTTG	1889	6	+	Arabidopsis thaliana
GmFtsH1	MYB recognition site	CCGTTG	1918	6	-	Arabidopsis thaliana
GmFtsH1	CAAT-box	CAAAT	20	5	+	Pisum sativum	common cis-acting element in promoter and enhancer regions
GmFtsH1	CAAT-box	CAAAT	56	5	+	Pisum sativum	common cis-acting element in promoter and enhancer regions
GmFtsH1	CAAT-box	CAAT	177	4	-	Nicotiana glutinosa
GmFtsH1	CAAT-box	CAAAT	190	5	-	Pisum sativum	common cis-acting element in promoter and enhancer regions
GmFtsH1	CAAT-box	CAAT	206	4	+	Nicotiana glutinosa
GmFtsH1	CAAT-box	CAAT	260	4	-	Nicotiana glutinosa
GmFtsH1	CAAT-box	CAAAT	289	5	+	Pisum sativum	common cis-acting element in promoter and enhancer regions
GmFtsH1	CAAT-box	CAAT	392	4	+	Nicotiana glutinosa
GmFtsH1	CAAT-box	CAAT	412	4	-	Nicotiana glutinosa
GmFtsH1	CAAT-box	CAAAT	534	5	-	Pisum sativum	common cis-acting element in promoter and enhancer regions
GmFtsH1	CAAT-box	CAAAT	552	5	+	Pisum sativum	common cis-acting element in promoter and enhancer regions
GmFtsH1	CAAT-box	CAAT	578	4	+	Nicotiana glutinosa
GmFtsH1	CAAT-box	CAAAT	678	5	-	Pisum sativum	common cis-acting element in promoter and enhancer regions
GmFtsH1	CAAT-box	CAAT	781	4	+	Nicotiana glutinosa
GmFtsH1	CAAT-box	CAAAT	1047	5	+	Pisum sativum	common cis-acting element in promoter and enhancer regions
GmFtsH1	CAAT-box	CAAT	1101	4	+	Nicotiana glutinosa
GmFtsH1	CAAT-box	CCAAT	1144	5	-	Arabidopsis thaliana	common cis-acting element in promoter and enhancer regions
GmFtsH1	CAAT-box	CAAT	1419	4	+	Nicotiana glutinosa
GmFtsH1	CAAT-box	CAAT	1490	4	-	Nicotiana glutinosa
GmFtsH1	CAAT-box	CAAAT	1529	5	-	Pisum sativum	common cis-acting element in promoter and enhancer regions
GmFtsH1	CAAT-box	CAAT	1566	4	-	Nicotiana glutinosa
GmFtsH1	CAAT-box	CAAAT	1641	5	+	Pisum sativum	common cis-acting element in promoter and enhancer regions
GmFtsH1	CAAT-box	CAAT	1821	4	+	Nicotiana glutinosa
GmFtsH1	CAAT-box	CCAAT	1845	5	+	Arabidopsis thaliana	common cis-acting element in promoter and enhancer regions
GmFtsH1	CAAT-box	CAAT	1846	4	+	Nicotiana glutinosa
GmFtsH1	CAAT-box	CAAT	1880	4	+	Nicotiana glutinosa
GmFtsH1	CAAT-box	CAAT	1913	4	+	Nicotiana glutinosa
GmFtsH1	chs-CMA1a	TTACTTAA	1392	8	+	Daucus carota	part of a light responsive element
GmFtsH1	G-box	CACGTC	1671	6	+	Zea mays	cis-acting regulatory element involved in light responsiveness
GmFtsH1	G-box	CACGTG	1725	6	-	Arabidopsis thaliana	cis-acting regulatory element involved in light responsiveness
GmFtsH1	G-box	CACGTC	1928	6	+	Zea mays	cis-acting regulatory element involved in light responsiveness
GmFtsH1	G-box	CACGTC	2083	6	+	Zea mays	cis-acting regulatory element involved in light responsiveness
GmFtsH2	G-Box	CACGTT	1575	6	-	Pisum sativum	cis-acting regulatory element involved in light responsiveness
GmFtsH2	WRE3	CCACCT	290	6	-	Pisum sativum
GmFtsH2	W box	TTGACC	651	6	+	Arabidopsis thaliana
GmFtsH2	W box	TTGACC	1309	6	-	Arabidopsis thaliana
GmFtsH2	3-AF3 binding site	CACTATCTAAC	1954	10	-	Pisum sativum	part of a conserved DNA module array (CMA3)
GmFtsH2	STRE	AGGGG	310	5	+	Arabidopsis thaliana
GmFtsH2	ARE	AAACCA	71	6	-	Zea mays	cis-acting regulatory element essential for the anaerobic induction
GmFtsH2	ARE	AAACCA	78	6	-	Zea mays	cis-acting regulatory element essential for the anaerobic induction
GmFtsH2	ARE	AAACCA	1478	6	+	Zea mays	cis-acting regulatory element essential for the anaerobic induction
GmFtsH2	ABRE	ACGTG	455	5	-	Arabidopsis thaliana	cis-acting element involved in the abscisic acid responsiveness
GmFtsH2	ABRE	GCAACGTGTC	1444	9	+	Hordeum vulgare	cis-acting element involved in the abscisic acid responsiveness
GmFtsH2	ABRE	TACGTGTC	1446	8	+	Oryza sativa	cis-acting element involved in the abscisic acid responsiveness
GmFtsH2	ABRE	ACGTG	1447	5	+	Arabidopsis thaliana	cis-acting element involved in the abscisic acid responsiveness
GmFtsH2	ABRE	ACGTG	1576	5	+	Arabidopsis thaliana	cis-acting element involved in the abscisic acid responsiveness
GmFtsH2	MYB-like sequence	TAACCA	529	6	-	Arabidopsis thaliana
GmFtsH2	MYB-like sequence	TAACCA	1531	6	+	Arabidopsis thaliana
GmFtsH2	MYB-like sequence	TAACCA	1946	6	+	Arabidopsis thaliana
GmFtsH2	CAT-box	GCCACT	94	6	+	Arabidopsis thaliana	cis-acting regulatory element related to meristem expression
GmFtsH2	TATA	TATAAAAT	841	8	+	Arabidopsis thaliana
GmFtsH2	TATA	TATAAAAT	1903	8	-	Arabidopsis thaliana
GmFtsH2	AuxRR-core	GGTCCAT	232	7	+	Nicotiana tabacum	cis-acting regulatory element involved in auxin responsiveness
GmFtsH2	AuxRR-core	GGTCCAT	1786	7	+	Nicotiana tabacum	cis-acting regulatory element involved in auxin responsiveness
GmFtsH2	Myb	TAACTG	1009	6	+	Arabidopsis thaliana
GmFtsH2	Myb	TAACTG	1994	6	-	Arabidopsis thaliana
GmFtsH2	MYC	CATGTG	21	6	-	Arabidopsis thaliana
GmFtsH2	MYC	CATTTG	596	6	-	Arabidopsis thaliana
GmFtsH2	MYC	CATTTG	889	6	-	Arabidopsis thaliana
GmFtsH2	MYC	CAATTG	1688	6	-	Arabidopsis thaliana
GmFtsH2	GT1-motif	GGTTAA	1190	6	+	Arabidopsis thaliana	light responsive element
GmFtsH2	GT1-motif	GGTTAAT	1529	7	-	Avena sativa	light responsive element
GmFtsH2	GT1-motif	GGTTAA	1530	6	-	Arabidopsis thaliana	light responsive element
GmFtsH2	TGACG-motif	TGACG	1109	5	+	Hordeum vulgare	cis-acting regulatory element involved in the MeJA-responsiveness
GmFtsH2	TGACG-motif	TGACG	1550	5	+	Hordeum vulgare	cis-acting regulatory element involved in the MeJA-responsiveness
GmFtsH2	MYB	TAACCA	529	6	-	Arabidopsis thaliana
GmFtsH2	MYB	CAACCA	570	6	+	Arabidopsis thaliana
GmFtsH2	MYB	CAACAG	585	6	-	Arabidopsis thaliana
GmFtsH2	MYB	TAACCA	1531	6	+	Arabidopsis thaliana
GmFtsH2	MYB	TAACCA	1946	6	+	Arabidopsis thaliana
GmFtsH2	Myb-binding site	CAACAG	585	6	-	Nicotiana tabacum
GmFtsH2	CGTCA-motif	CGTCA	1109	5	-	Hordeum vulgare	cis-acting regulatory element involved in the MeJA-responsiveness
GmFtsH2	CGTCA-motif	CGTCA	1550	5	-	Hordeum vulgare	cis-acting regulatory element involved in the MeJA-responsiveness
GmFtsH2	TC-rich repeats	ATTCTCTAAC	1029	9	-	Nicotiana tabacum	cis-acting element involved in defense and stress responsiveness
GmFtsH2	TC-rich repeats	ATTCTCTAAC	1239	9	+	Nicotiana tabacum	cis-acting element involved in defense and stress responsiveness
GmFtsH2	CAAT-box	CAAAT	2	5	-	Pisum sativum	common cis-acting element in promoter and enhancer regions
GmFtsH2	CAAT-box	CAAT	30	4	+	Nicotiana glutinosa
GmFtsH2	CAAT-box	CCAAT	48	5	+	Arabidopsis thaliana	common cis-acting element in promoter and enhancer regions
GmFtsH2	CAAT-box	CAAT	49	4	+	Nicotiana glutinosa
GmFtsH2	CAAT-box	CCAAT	62	5	-	Arabidopsis thaliana	common cis-acting element in promoter and enhancer regions
GmFtsH2	CAAT-box	CAAAT	101	5	-	Pisum sativum	common cis-acting element in promoter and enhancer regions
GmFtsH2	CAAT-box	CAAAT	156	5	-	Pisum sativum	common cis-acting element in promoter and enhancer regions
GmFtsH2	CAAT-box	CCAAT	173	5	+	Arabidopsis thaliana	common cis-acting element in promoter and enhancer regions
GmFtsH2	CAAT-box	CAAT	174	4	+	Nicotiana glutinosa
GmFtsH2	CAAT-box	CAAAT	214	5	+	Pisum sativum	common cis-acting element in promoter and enhancer regions
GmFtsH2	CAAT-box	CAAT	249	4	-	Nicotiana glutinosa
GmFtsH2	CAAT-box	CAAAT	267	5	-	Pisum sativum	common cis-acting element in promoter and enhancer regions
GmFtsH2	CAAT-box	CAAAT	338	5	+	Pisum sativum	common cis-acting element in promoter and enhancer regions
GmFtsH2	CAAT-box	CAAAT	359	5	-	Pisum sativum	common cis-acting element in promoter and enhancer regions
GmFtsH2	CAAT-box	CAAT	460	4	-	Nicotiana glutinosa
GmFtsH2	CAAT-box	CAAT	496	4	+	Nicotiana glutinosa
GmFtsH2	CAAT-box	CAAAT	526	5	-	Pisum sativum	common cis-acting element in promoter and enhancer regions
GmFtsH2	CAAT-box	CAAT	537	4	+	Nicotiana glutinosa
GmFtsH2	CAAT-box	CAAAT	596	5	+	Pisum sativum	common cis-acting element in promoter and enhancer regions
GmFtsH2	CAAT-box	CAAAT	646	5	+	Pisum sativum	common cis-acting element in promoter and enhancer regions
GmFtsH2	CAAT-box	CAAAT	649	5	-	Pisum sativum	common cis-acting element in promoter and enhancer regions
GmFtsH2	CAAT-box	CCAAT	714	5	-	Arabidopsis thaliana	common cis-acting element in promoter and enhancer regions
GmFtsH2	CAAT-box	CAAT	772	4	-	Nicotiana glutinosa
GmFtsH2	CAAT-box	CAAT	834	4	+	Nicotiana glutinosa
GmFtsH2	CAAT-box	CAAT	857	4	+	Nicotiana glutinosa
GmFtsH2	CAAT-box	CAAAT	889	5	+	Pisum sativum	common cis-acting element in promoter and enhancer regions
GmFtsH2	CAAT-box	CAAT	896	4	+	Nicotiana glutinosa
GmFtsH2	CAAT-box	CCAAT	929	5	-	Arabidopsis thaliana	common cis-acting element in promoter and enhancer regions
GmFtsH2	CAAT-box	CAAAT	935	5	-	Pisum sativum	common cis-acting element in promoter and enhancer regions
GmFtsH2	CAAT-box	CAAT	1026	4	-	Nicotiana glutinosa
GmFtsH2	CAAT-box	CAAT	1064	4	-	Nicotiana glutinosa
GmFtsH2	CAAT-box	CAAT	1088	4	-	Nicotiana glutinosa
GmFtsH2	CAAT-box	CAAT	1098	4	-	Nicotiana glutinosa
GmFtsH2	CAAT-box	CAAAT	1106	5	-	Pisum sativum	common cis-acting element in promoter and enhancer regions
GmFtsH2	CAAT-box	CAAAT	1151	5	+	Pisum sativum	common cis-acting element in promoter and enhancer regions
GmFtsH2	CAAT-box	CAAT	1264	4	+	Nicotiana glutinosa
GmFtsH2	CAAT-box	CAAAT	1266	5	-	Pisum sativum	common cis-acting element in promoter and enhancer regions
GmFtsH2	CAAT-box	CAAT	1316	4	-	Nicotiana glutinosa
GmFtsH2	CAAT-box	CAAAT	1350	5	-	Pisum sativum	common cis-acting element in promoter and enhancer regions
GmFtsH2	CAAT-box	CAAT	1466	4	+	Nicotiana glutinosa
GmFtsH2	CAAT-box	CAAT	1493	4	-	Nicotiana glutinosa
GmFtsH2	CAAT-box	CAAAT	1524	5	+	Pisum sativum	common cis-acting element in promoter and enhancer regions
GmFtsH2	CAAT-box	CAAAT	1535	5	+	Pisum sativum	common cis-acting element in promoter and enhancer regions
GmFtsH2	CAAT-box	CAAT	1688	4	+	Nicotiana glutinosa
GmFtsH2	CAAT-box	CCAAT	1690	5	-	Arabidopsis thaliana	common cis-acting element in promoter and enhancer regions
GmFtsH2	CAAT-box	CAAT	1724	4	+	Nicotiana glutinosa
GmFtsH2	CAAT-box	CAAAT	1749	5	-	Pisum sativum	common cis-acting element in promoter and enhancer regions
GmFtsH2	GARE-motif	TCTGTTG	584	7	+	Brassica oleracea	gibberellin-responsive element
GmFtsH2	G-box	TACGTG	455	6	-	Arabidopsis thaliana	cis-acting regulatory element involved in light responsiveness
GmFtsH2	G-box	TAACACGTAG	1445	9	-	Brassica oleracea	cis-acting regulatory element involved in light responsiveness
GmFtsH2	G-box	TACGTG	1446	6	+	Arabidopsis thaliana	cis-acting regulatory element involved in light responsiveness
GmFtsH2	Box 4	ATTAAT	217	6	+	Petroselinum crispum	part of a conserved DNA module involved in light responsiveness
GmFtsH2	Box 4	ATTAAT	468	6	+	Petroselinum crispum	part of a conserved DNA module involved in light responsiveness
GmFtsH2	Box 4	ATTAAT	1019	6	-	Petroselinum crispum	part of a conserved DNA module involved in light responsiveness
GmFtsH2	TCT-motif	TCTTAC	354	6	-	Arabidopsis thaliana	part of a light responsive element
GmFtsH2	AT~TATA-box	TATATA	1764	6	-	Arabidopsis thaliana
GmFtsH2	AT~TATA-box	TATATA	1913	6	-	Arabidopsis thaliana
GmFtsH2	ERE	ATTTCATA	519	8	+	Nicotiana glutinos
GmFtsH2	ERE	ATTTCATA	625	8	-	Nicotiana glutinos
GmFtsH2	ERE	ATTTTAAA	1281	8	+	Nicotiana glutinos
GmFtsH2	ERE	ATTTTAAA	1635	8	+	Nicotiana glutinos
GmFtsH2	ERE	ATTTTAAA	1742	8	+	Nicotiana glutinos
GmFtsH2	ERE	ATTTTAAA	1769	8	+	Nicotiana glutinos
GmFtsH2	ERE	ATTTTAAA	1844	8	+	Nicotiana glutinos
GmFtsH2	TATA-box	TATACA	33	6	-	Helianthus annuus	core promoter element around -30 of transcription start
GmFtsH2	TATA-box	TATA	35	4	+	Arabidopsis thaliana	core promoter element around -30 of transcription start
GmFtsH2	TATA-box	ATATAT	176	6	+	Brassica napus	core promoter element around -30 of transcription start
GmFtsH2	TATA-box	TATA	177	4	+	Arabidopsis thaliana	core promoter element around -30 of transcription start
GmFtsH2	TATA-box	ATTATA	377	6	+	Brassica napus	core promoter element around -30 of transcription start
GmFtsH2	TATA-box	TATAA	378	5	-	Arabidopsis thaliana	core promoter element around -30 of transcription start
GmFtsH2	TATA-box	TATA	379	4	+	Arabidopsis thaliana	core promoter element around -30 of transcription start
GmFtsH2	TATA-box	TATAA	532	5	-	Arabidopsis thaliana	core promoter element around -30 of transcription start
GmFtsH2	TATA-box	TATA	533	4	+	Arabidopsis thaliana	core promoter element around -30 of transcription start
GmFtsH2	TATA-box	TACATAAA	633	8	-	Oryza sativa	core promoter element around -30 of transcription start
GmFtsH2	TATA-box	TATAAA	668	6	-	Helianthus annuus	core promoter element around -30 of transcription start
GmFtsH2	TATA-box	TATAA	669	5	-	Arabidopsis thaliana	core promoter element around -30 of transcription start
GmFtsH2	TATA-box	TATA	670	4	+	Arabidopsis thaliana	core promoter element around -30 of transcription start
GmFtsH2	TATA-box	TATTTAAA	726	8	-	Arabidopsis thaliana	core promoter element around -30 of transcription start
GmFtsH2	TATA-box	TACAAAA	734	7	-	Oryza sativa	core promoter element around -30 of transcription start
GmFtsH2	TATA-box	ccTATAAAaa	735	9	-	Arabidopsis thaliana	core promoter element around -30 of transcription start
GmFtsH2	TATA-box	TATACA	737	6	-	Helianthus annuus	core promoter element around -30 of transcription start
GmFtsH2	TATA-box	TATA	739	4	+	Arabidopsis thaliana	core promoter element around -30 of transcription start
GmFtsH2	TATA-box	ATATAA	840	6	+	Brassica oleracea	core promoter element around -30 of transcription start
GmFtsH2	TATA-box	TATA	841	4	+	Arabidopsis thaliana	core promoter element around -30 of transcription start
GmFtsH2	TATA-box	TATA	1038	4	-	Arabidopsis thaliana	core promoter element around -30 of transcription start
GmFtsH2	TATA-box	TATA	1095	4	-	Arabidopsis thaliana	core promoter element around -30 of transcription start
GmFtsH2	TATA-box	TACAAAA	1140	7	+	Oryza sativa	core promoter element around -30 of transcription start
GmFtsH2	TATA-box	TATAAATA	1323	8	-	Daucus carota	core promoter element around -30 of transcription start
GmFtsH2	TATA-box	TATAAAT	1324	7	-	Brassica juncea	core promoter element around -30 of transcription start
GmFtsH2	TATA-box	TATAAA	1325	6	-	Helianthus annuus	core promoter element around -30 of transcription start
GmFtsH2	TATA-box	TATAA	1326	5	-	Arabidopsis thaliana	core promoter element around -30 of transcription start
GmFtsH2	TATA-box	TATA	1327	4	-	Arabidopsis thaliana	core promoter element around -30 of transcription start
GmFtsH2	TATA-box	TATAAA	1514	6	-	Helianthus annuus	core promoter element around -30 of transcription start
GmFtsH2	TATA-box	TATAA	1515	5	-	Arabidopsis thaliana	core promoter element around -30 of transcription start
GmFtsH2	TATA-box	TATA	1516	4	-	Arabidopsis thaliana	core promoter element around -30 of transcription start
GmFtsH2	TATA-box	ATTATA	1606	6	+	Brassica napus	core promoter element around -30 of transcription start
GmFtsH2	TATA-box	TATAA	1607	5	-	Arabidopsis thaliana	core promoter element around -30 of transcription start
GmFtsH2	TATA-box	TATA	1608	4	-	Arabidopsis thaliana	core promoter element around -30 of transcription start
GmFtsH2	TATA-box	ATATAA	1657	6	+	Brassica oleracea	core promoter element around -30 of transcription start
GmFtsH2	TATA-box	TATA	1658	4	-	Arabidopsis thaliana	core promoter element around -30 of transcription start
GmFtsH2	TATA-box	TATACA	1701	6	-	Helianthus annuus	core promoter element around -30 of transcription start
GmFtsH2	TATA-box	TATA	1703	4	-	Arabidopsis thaliana	core promoter element around -30 of transcription start
GmFtsH2	TATA-box	TATA	1758	4	-	Arabidopsis thaliana	core promoter element around -30 of transcription start
GmFtsH2	TATA-box	ATATAT	1763	6	-	Brassica napus	core promoter element around -30 of transcription start
GmFtsH2	TATA-box	TATATA	1764	6	-	Arabidopsis thaliana	core promoter element around -30 of transcription start
GmFtsH2	TATA-box	ATATAT	1765	6	-	Brassica napus	core promoter element around -30 of transcription start
GmFtsH2	TATA-box	TATA	1766	4	-	Arabidopsis thaliana	core promoter element around -30 of transcription start
GmFtsH2	TATA-box	ATTATA	1806	6	+	Brassica napus	core promoter element around -30 of transcription start
GmFtsH2	TATA-box	TATAA	1807	5	-	Arabidopsis thaliana	core promoter element around -30 of transcription start
GmFtsH2	TATA-box	TATA	1808	4	-	Arabidopsis thaliana	core promoter element around -30 of transcription start
GmFtsH2	TATA-box	TATAAAA	1829	7	-	Pisum sativum	core promoter element around -30 of transcription start
GmFtsH2	TATA-box	TATAAA	1830	6	-	Helianthus annuus	core promoter element around -30 of transcription start
GmFtsH2	TATA-box	TATAA	1831	5	-	Arabidopsis thaliana	core promoter element around -30 of transcription start
GmFtsH2	TATA-box	TATA	1832	4	-	Arabidopsis thaliana	core promoter element around -30 of transcription start
GmFtsH2	TATA-box	TATAAAA	1904	7	-	Pisum sativum	core promoter element around -30 of transcription start
GmFtsH2	TATA-box	TATAAA	1905	6	-	Helianthus annuus	core promoter element around -30 of transcription start
GmFtsH2	TATA-box	TATAA	1906	5	-	Arabidopsis thaliana	core promoter element around -30 of transcription start
GmFtsH2	TATA-box	TATA	1907	4	-	Arabidopsis thaliana	core promoter element around -30 of transcription start
GmFtsH2	TATA-box	ATATAT	1912	6	-	Brassica napus	core promoter element around -30 of transcription start
GmFtsH2	TATA-box	TATATA	1913	6	-	Arabidopsis thaliana	core promoter element around -30 of transcription start
GmFtsH2	TATA-box	TATA	1915	4	-	Arabidopsis thaliana	core promoter element around -30 of transcription start
GmFtsH2	TATA-box	TACAAAA	1981	7	-	Oryza sativa	core promoter element around -30 of transcription start
GmFtsH2	TATC-box	TATCCCA	9	7	+	Oryza sativa	cis-acting element involved in gibberellin-responsiveness
GmFtsH3	TCA-element	CCATCTTTTT	83	9	-	Nicotiana tabacum	cis-acting element involved in salicylic acid responsiveness
GmFtsH3	TATA	TATAAAAT	747	8	-	Arabidopsis thaliana
GmFtsH3	TATA	TATAAAAT	987	8	-	Arabidopsis thaliana
GmFtsH3	TATA	TATAAAAT	991	8	+	Arabidopsis thaliana
GmFtsH3	TATA	TATAAAAT	997	8	-	Arabidopsis thaliana
GmFtsH3	ABRE4	CACGTA	716	6	-	Zea mays
GmFtsH3	ABRE4	CACGTA	804	6	+	Zea mays
GmFtsH3	ABRE4	CACGTA	1579	6	-	Zea mays
GmFtsH3	CAAT-box	CAAT	24	4	-	Nicotiana glutinosa
GmFtsH3	CAAT-box	CAAT	124	4	-	Nicotiana glutinosa
GmFtsH3	CAAT-box	CCAAT	226	5	+	Arabidopsis thaliana	common cis-acting element in promoter and enhancer regions
GmFtsH3	CAAT-box	CAAT	227	4	+	Nicotiana glutinosa
GmFtsH3	CAAT-box	CAAT	316	4	+	Nicotiana glutinosa
GmFtsH3	CAAT-box	CAAT	388	4	+	Nicotiana glutinosa
GmFtsH3	CAAT-box	CCAAT	406	5	+	Arabidopsis thaliana	common cis-acting element in promoter and enhancer regions
GmFtsH3	CAAT-box	CAAT	407	4	+	Nicotiana glutinosa
GmFtsH3	CAAT-box	CCAAT	420	5	-	Arabidopsis thaliana	common cis-acting element in promoter and enhancer regions
GmFtsH3	CAAT-box	CAAAT	507	5	-	Pisum sativum	common cis-acting element in promoter and enhancer regions
GmFtsH3	CAAT-box	CCAAT	524	5	+	Arabidopsis thaliana	common cis-acting element in promoter and enhancer regions
GmFtsH3	CAAT-box	CAAT	525	4	+	Nicotiana glutinosa
GmFtsH3	CAAT-box	CAAAT	565	5	+	Pisum sativum	common cis-acting element in promoter and enhancer regions
GmFtsH3	CAAT-box	CAAT	600	4	-	Nicotiana glutinosa
GmFtsH3	CAAT-box	CAAAT	618	5	-	Pisum sativum	common cis-acting element in promoter and enhancer regions
GmFtsH3	CAAT-box	CAAAT	687	5	+	Pisum sativum	common cis-acting element in promoter and enhancer regions
GmFtsH3	CAAT-box	CAAAT	708	5	-	Pisum sativum	common cis-acting element in promoter and enhancer regions
GmFtsH3	CAAT-box	CAAT	809	4	-	Nicotiana glutinosa
GmFtsH3	CAAT-box	CAAT	845	4	+	Nicotiana glutinosa
GmFtsH3	CAAT-box	CAAAT	864	5	+	Pisum sativum	common cis-acting element in promoter and enhancer regions
GmFtsH3	CAAT-box	CAAAT	875	5	-	Pisum sativum	common cis-acting element in promoter and enhancer regions
GmFtsH3	CAAT-box	CAAT	886	4	+	Nicotiana glutinosa
GmFtsH3	CAAT-box	CAAAT	940	5	-	Pisum sativum	common cis-acting element in promoter and enhancer regions
GmFtsH3	CAAT-box	CAAAT	945	5	+	Pisum sativum	common cis-acting element in promoter and enhancer regions
GmFtsH3	CAAT-box	CAAAT	1014	5	+	Pisum sativum	common cis-acting element in promoter and enhancer regions
GmFtsH3	CAAT-box	CCAAT	1082	5	-	Arabidopsis thaliana	common cis-acting element in promoter and enhancer regions
GmFtsH3	CAAT-box	CAAT	1140	4	-	Nicotiana glutinosa
GmFtsH3	CAAT-box	CAAT	1199	4	+	Nicotiana glutinosa
GmFtsH3	CAAT-box	CAAT	1222	4	+	Nicotiana glutinosa
GmFtsH3	CAAT-box	CAAAT	1254	5	+	Pisum sativum	common cis-acting element in promoter and enhancer regions
GmFtsH3	CAAT-box	CAAT	1261	4	+	Nicotiana glutinosa
GmFtsH3	CAAT-box	CCAAT	1294	5	-	Arabidopsis thaliana	common cis-acting element in promoter and enhancer regions
GmFtsH3	CAAT-box	CAAAT	1300	5	-	Pisum sativum	common cis-acting element in promoter and enhancer regions
GmFtsH3	CAAT-box	CAAT	1435	4	-	Nicotiana glutinosa
GmFtsH3	CAAT-box	CAAT	1459	4	-	Nicotiana glutinosa
GmFtsH3	CAAT-box	CAAAT	1477	5	-	Pisum sativum	common cis-acting element in promoter and enhancer regions
GmFtsH3	CAAT-box	CAAT	1497	4	+	Nicotiana glutinosa
GmFtsH3	CAAT-box	CAAT	1599	4	+	Nicotiana glutinosa
GmFtsH3	CAAT-box	CAAAT	1657	5	+	Pisum sativum	common cis-acting element in promoter and enhancer regions
GmFtsH3	CAAT-box	CAAAT	1668	5	+	Pisum sativum	common cis-acting element in promoter and enhancer regions
GmFtsH3	CAAT-box	CCAAT	1850	5	-	Arabidopsis thaliana	common cis-acting element in promoter and enhancer regions
GmFtsH3	CAAT-box	CAAT	1857	4	+	Nicotiana glutinosa
GmFtsH3	CAAT-box	CAAT	1870	4	+	Nicotiana glutinosa
GmFtsH3	G-Box	TCCACATGGCA	1672	10	-	Triticum aestivum	cis-acting regulatory element involved in light responsiveness
GmFtsH3	G-Box	CACGTT	1708	6	-	Pisum sativum	cis-acting regulatory element involved in light responsiveness
GmFtsH3	ACE	CTAACGTATT	1063	9	-	Petroselinum crispum	cis-acting element involved in light responsiveness
GmFtsH3	AT~TATA-box	TATATAAA	749	8	-	Arabidopsis thaliana
GmFtsH3	AT~TATA-box	TATATA	751	6	+	Arabidopsis thaliana
GmFtsH3	AT~TATA-box	TATATA	1883	6	-	Arabidopsis thaliana
GmFtsH3	ATC-motif	AGTAATCT	350	8	-	Spinacia oleracea	part of a conserved DNA module involved in light responsiveness
GmFtsH3	ABRE	ACGTG	717	5	+	Arabidopsis thaliana	cis-acting element involved in the abscisic acid responsiveness
GmFtsH3	ABRE	ACGTG	804	5	-	Arabidopsis thaliana	cis-acting element involved in the abscisic acid responsiveness
GmFtsH3	ABRE	GCAACGTGTC	1577	9	+	Hordeum vulgare	cis-acting element involved in the abscisic acid responsiveness
GmFtsH3	ABRE	TACGTGTC	1579	8	+	Oryza sativa	cis-acting element involved in the abscisic acid responsiveness
GmFtsH3	ABRE	ACGTG	1580	5	+	Arabidopsis thaliana	cis-acting element involved in the abscisic acid responsiveness
GmFtsH3	ABRE	ACGTG	1709	5	+	Arabidopsis thaliana	cis-acting element involved in the abscisic acid responsiveness
GmFtsH3	MYB	TAACCA	878	6	-	Arabidopsis thaliana
GmFtsH3	MYB	CAACCA	919	6	+	Arabidopsis thaliana
GmFtsH3	MYB	CAACAG	934	6	-	Arabidopsis thaliana
GmFtsH3	MYB	TAACCA	1916	6	+	Arabidopsis thaliana
GmFtsH3	CAT-box	GCCACT	366	6	+	Arabidopsis thaliana	cis-acting regulatory element related to meristem expression
GmFtsH3	CAT-box	GCCACT	446	6	+	Arabidopsis thaliana	cis-acting regulatory element related to meristem expression
GmFtsH3	CAT-box	GCCACT	961	6	-	Arabidopsis thaliana	cis-acting regulatory element related to meristem expression
GmFtsH3	STRE	AGGGG	1269	5	-	Arabidopsis thaliana
GmFtsH3	STRE	AGGGG	1349	5	+	Arabidopsis thaliana
GmFtsH3	GARE-motif	TCTGTTG	933	7	+	Brassica oleracea	gibberellin-responsive element
GmFtsH3	Myb-binding site	CAACAG	934	6	-	Nicotiana tabacum
GmFtsH3	Myb	TAACTG	381	6	-	Arabidopsis thaliana
GmFtsH3	Box 4	ATTAAT	568	6	+	Petroselinum crispum	part of a conserved DNA module involved in light responsiveness
GmFtsH3	Box 4	ATTAAT	817	6	+	Petroselinum crispum	part of a conserved DNA module involved in light responsiveness
GmFtsH3	AE-box	AGAAACAA	1317	8	+	Arabidopsis thaliana	part of a module for light response
GmFtsH3	AE-box	AGAAACTT	1372	8	+	Arabidopsis thaliana	part of a module for light response
GmFtsH3	Sp1	GGGCGG	165	6	-	Oryza sativa	light responsive element
GmFtsH3	MYB-like sequence	TAACCA	878	6	-	Arabidopsis thaliana
GmFtsH3	MYB-like sequence	TAACCA	1916	6	+	Arabidopsis thaliana
GmFtsH3	MYC	CATGTG	62	6	-	Arabidopsis thaliana
GmFtsH3	MYC	CATTTG	945	6	-	Arabidopsis thaliana
GmFtsH3	MYC	CATTTG	1254	6	-	Arabidopsis thaliana
GmFtsH3	MYC	CATGTG	1675	6	+	Arabidopsis thaliana
GmFtsH3	MYC	CATGTG	1969	6	+	Arabidopsis thaliana
GmFtsH3	G-box	TACGTG	716	6	+	Arabidopsis thaliana	cis-acting regulatory element involved in light responsiveness
GmFtsH3	G-box	TACGTG	804	6	-	Arabidopsis thaliana	cis-acting regulatory element involved in light responsiveness
GmFtsH3	G-box	TAACACGTAG	1578	9	-	Brassica oleracea	cis-acting regulatory element involved in light responsiveness
GmFtsH3	G-box	TACGTG	1579	6	+	Arabidopsis thaliana	cis-acting regulatory element involved in light responsiveness
GmFtsH3	ARE	AAACCA	422	6	-	Zea mays	cis-acting regulatory element essential for the anaerobic induction
GmFtsH3	ARE	AAACCA	429	6	-	Zea mays	cis-acting regulatory element essential for the anaerobic induction
GmFtsH3	ARE	AAACCA	1611	6	+	Zea mays	cis-acting regulatory element essential for the anaerobic induction
GmFtsH3	TATA-box	TATA	20	4	+	Arabidopsis thaliana	core promoter element around -30 of transcription start
GmFtsH3	TATA-box	TATA	101	4	+	Arabidopsis thaliana	core promoter element around -30 of transcription start
GmFtsH3	TATA-box	TATACA	391	6	-	Helianthus annuus	core promoter element around -30 of transcription start
GmFtsH3	TATA-box	TATA	393	4	+	Arabidopsis thaliana	core promoter element around -30 of transcription start
GmFtsH3	TATA-box	ATATAT	527	6	+	Brassica napus	core promoter element around -30 of transcription start
GmFtsH3	TATA-box	TATA	528	4	+	Arabidopsis thaliana	core promoter element around -30 of transcription start
GmFtsH3	TATA-box	ATTATA	726	6	+	Brassica napus	core promoter element around -30 of transcription start
GmFtsH3	TATA-box	TATAA	727	5	-	Arabidopsis thaliana	core promoter element around -30 of transcription start
GmFtsH3	TATA-box	TATA	728	4	+	Arabidopsis thaliana	core promoter element around -30 of transcription start
GmFtsH3	TATA-box	TATAAAA	748	7	-	Pisum sativum	core promoter element around -30 of transcription start
GmFtsH3	TATA-box	TATAAA	749	6	-	Helianthus annuus	core promoter element around -30 of transcription start
GmFtsH3	TATA-box	TATATAA	750	7	-	Arabidopsis thaliana	core promoter element around -30 of transcription start
GmFtsH3	TATA-box	TATATA	751	6	+	Arabidopsis thaliana	core promoter element around -30 of transcription start
GmFtsH3	TATA-box	ATATAT	752	6	+	Brassica napus	core promoter element around -30 of transcription start
GmFtsH3	TATA-box	TATA	753	4	+	Arabidopsis thaliana	core promoter element around -30 of transcription start
GmFtsH3	TATA-box	ATATAT	797	6	+	Brassica napus	core promoter element around -30 of transcription start
GmFtsH3	TATA-box	TATA	798	4	+	Arabidopsis thaliana	core promoter element around -30 of transcription start
GmFtsH3	TATA-box	TATAA	881	5	-	Arabidopsis thaliana	core promoter element around -30 of transcription start
GmFtsH3	TATA-box	TATA	882	4	+	Arabidopsis thaliana	core promoter element around -30 of transcription start
GmFtsH3	TATA-box	TATAAAA	988	7	-	Pisum sativum	core promoter element around -30 of transcription start
GmFtsH3	TATA-box	TATAAA	989	6	-	Helianthus annuus	core promoter element around -30 of transcription start
GmFtsH3	TATA-box	TATAA	990	5	-	Arabidopsis thaliana	core promoter element around -30 of transcription start
GmFtsH3	TATA-box	TATA	991	4	+	Arabidopsis thaliana	core promoter element around -30 of transcription start
GmFtsH3	TATA-box	TATAAAA	998	7	-	Pisum sativum	core promoter element around -30 of transcription start
GmFtsH3	TATA-box	TATAAA	999	6	-	Helianthus annuus	core promoter element around -30 of transcription start
GmFtsH3	TATA-box	TATAA	1000	5	-	Arabidopsis thaliana	core promoter element around -30 of transcription start
GmFtsH3	TATA-box	TATA	1001	4	-	Arabidopsis thaliana	core promoter element around -30 of transcription start
GmFtsH3	TATA-box	TATAAA	1036	6	-	Helianthus annuus	core promoter element around -30 of transcription start
GmFtsH3	TATA-box	TATAA	1037	5	-	Arabidopsis thaliana	core promoter element around -30 of transcription start
GmFtsH3	TATA-box	TATA	1038	4	-	Arabidopsis thaliana	core promoter element around -30 of transcription start
GmFtsH3	TATA-box	TATTTAAA	1094	8	-	Arabidopsis thaliana	core promoter element around -30 of transcription start
GmFtsH3	TATA-box	ATATAA	1408	6	+	Brassica oleracea	core promoter element around -30 of transcription start
GmFtsH3	TATA-box	TATA	1409	4	-	Arabidopsis thaliana	core promoter element around -30 of transcription start
GmFtsH3	TATA-box	ATATAT	1465	6	-	Brassica napus	core promoter element around -30 of transcription start
GmFtsH3	TATA-box	TATA	1466	4	-	Arabidopsis thaliana	core promoter element around -30 of transcription start
GmFtsH3	TATA-box	TATAAA	1647	6	-	Helianthus annuus	core promoter element around -30 of transcription start
GmFtsH3	TATA-box	TATAA	1648	5	-	Arabidopsis thaliana	core promoter element around -30 of transcription start
GmFtsH3	TATA-box	TATA	1649	4	-	Arabidopsis thaliana	core promoter element around -30 of transcription start
GmFtsH3	TATA-box	ATTATA	1739	6	+	Brassica napus	core promoter element around -30 of transcription start
GmFtsH3	TATA-box	TATAA	1740	5	-	Arabidopsis thaliana	core promoter element around -30 of transcription start
GmFtsH3	TATA-box	TATA	1741	4	-	Arabidopsis thaliana	core promoter element around -30 of transcription start
GmFtsH3	TATA-box	TATACA	1834	6	-	Helianthus annuus	core promoter element around -30 of transcription start
GmFtsH3	TATA-box	TATA	1836	4	-	Arabidopsis thaliana	core promoter element around -30 of transcription start
GmFtsH3	TATA-box	ATTATA	1881	6	+	Brassica napus	core promoter element around -30 of transcription start
GmFtsH3	TATA-box	TATATAA	1882	7	-	Arabidopsis thaliana	core promoter element around -30 of transcription start
GmFtsH3	TATA-box	TATATA	1883	6	-	Arabidopsis thaliana	core promoter element around -30 of transcription start
GmFtsH3	TATA-box	ATATAA	1884	6	+	Brassica oleracea	core promoter element around -30 of transcription start
GmFtsH3	TATA-box	TATA	1885	4	-	Arabidopsis thaliana	core promoter element around -30 of transcription start
GmFtsH3	LTR	CCGAAA	1952	6	+	Hordeum vulgare	cis-acting element involved in low-temperature responsiveness
GmFtsH3	TCT-motif	TCTTAC	703	6	-	Arabidopsis thaliana	part of a light responsive element
GmFtsH4	TGACG-motif	TGACG	1375	5	+	Hordeum vulgare	cis-acting regulatory element involved in the MeJA-responsiveness
GmFtsH4	WRE3	CCACCT	319	6	-	Pisum sativum
GmFtsH4	TATA	TATAAAAT	739	8	-	Arabidopsis thaliana
GmFtsH4	TATA	TATAAAAT	881	8	+	Arabidopsis thaliana
GmFtsH4	Gap-box	CAAATGAA(A/G)A	473	9.5	-	Arabidopsis thaliana	part of a light responsive element
GmFtsH4	WUN-motif	TTATTACAT	147	9	+	Nicotiana glutinosa
GmFtsH4	AT~TATA-box	TATATAAA	741	8	-	Arabidopsis thaliana
GmFtsH4	AT~TATA-box	TATATA	743	6	+	Arabidopsis thaliana
GmFtsH4	AT~TATA-box	TATATA	829	6	+	Arabidopsis thaliana
GmFtsH4	AT~TATA-box	TATATA	831	6	+	Arabidopsis thaliana
GmFtsH4	AT~TATA-box	TATATA	833	6	+	Arabidopsis thaliana
GmFtsH4	AT~TATA-box	TATATA	835	6	+	Arabidopsis thaliana
GmFtsH4	AT~TATA-box	TATATA	849	6	+	Arabidopsis thaliana
GmFtsH4	AT~TATA-box	TATATA	877	6	+	Arabidopsis thaliana
GmFtsH4	AT~TATA-box	TATATA	879	6	+	Arabidopsis thaliana
GmFtsH4	AT~TATA-box	TATATA	1673	6	-	Arabidopsis thaliana
GmFtsH4	G-box	TACGTG	950	6	-	Arabidopsis thaliana	cis-acting regulatory element involved in light responsiveness
GmFtsH4	G-box	GCCACGTGGA	1201	9	-	Arabidopsis thaliana	cis-acting regulatory element involved in light responsiveness
GmFtsH4	G-box	CACGTG	1203	6	+	Arabidopsis thaliana	cis-acting regulatory element involved in light responsiveness
GmFtsH4	G-box	CACGAC	1582	6	+	Zea mays	cis-acting regulatory element involved in light responsiveness
GmFtsH4	G-box	TACGTG	1812	6	-	Arabidopsis thaliana	cis-acting regulatory element involved in light responsiveness
GmFtsH4	G-box	CACGTG	2017	6	-	Arabidopsis thaliana	cis-acting regulatory element involved in light responsiveness
GmFtsH4	ABRE	ACGTG	950	5	-	Arabidopsis thaliana	cis-acting element involved in the abscisic acid responsiveness
GmFtsH4	ABRE	CACGTG	1203	6	+	Arabidopsis thaliana	cis-acting element involved in the abscisic acid responsiveness
GmFtsH4	ABRE	ACGTG	1204	5	+	Arabidopsis thaliana	cis-acting element involved in the abscisic acid responsiveness
GmFtsH4	ABRE	ACGTG	1794	5	+	Arabidopsis thaliana	cis-acting element involved in the abscisic acid responsiveness
GmFtsH4	ABRE	ACGTG	1812	5	-	Arabidopsis thaliana	cis-acting element involved in the abscisic acid responsiveness
GmFtsH4	ABRE	CACGTG	2017	6	-	Arabidopsis thaliana	cis-acting element involved in the abscisic acid responsiveness
GmFtsH4	ABRE	ACGTG	2018	5	+	Arabidopsis thaliana	cis-acting element involved in the abscisic acid responsiveness
GmFtsH4	Box II	CCACGTGGC	1202	9	+	Petroselinum crispum	part of a light responsive element
GmFtsH4	GT1-motif	GGTTAA	354	6	-	Arabidopsis thaliana	light responsive element
GmFtsH4	CAAT-box	CAAT	88	4	-	Nicotiana glutinosa
GmFtsH4	CAAT-box	CAAT	120	4	+	Nicotiana glutinosa
GmFtsH4	CAAT-box	CAAT	166	4	-	Nicotiana glutinosa
GmFtsH4	CAAT-box	CAAT	183	4	+	Nicotiana glutinosa
GmFtsH4	CAAT-box	CAAT	345	4	+	Nicotiana glutinosa
GmFtsH4	CAAT-box	CAAAT	386	5	+	Pisum sativum	common cis-acting element in promoter and enhancer regions
GmFtsH4	CAAT-box	CAAAT	429	5	+	Pisum sativum	common cis-acting element in promoter and enhancer regions
GmFtsH4	CAAT-box	CCAAT	443	5	+	Arabidopsis thaliana	common cis-acting element in promoter and enhancer regions
GmFtsH4	CAAT-box	CAAT	444	4	+	Nicotiana glutinosa
GmFtsH4	CAAT-box	CAAAT	478	5	-	Pisum sativum	common cis-acting element in promoter and enhancer regions
GmFtsH4	CAAT-box	CAAT	581	4	+	Nicotiana glutinosa
GmFtsH4	CAAT-box	CAAAT	583	5	-	Pisum sativum	common cis-acting element in promoter and enhancer regions
GmFtsH4	CAAT-box	CAAT	589	4	+	Nicotiana glutinosa
GmFtsH4	CAAT-box	CAAT	723	4	+	Nicotiana glutinosa
GmFtsH4	CAAT-box	CAAT	789	4	-	Nicotiana glutinosa
GmFtsH4	CAAT-box	CCAAT	900	5	-	Arabidopsis thaliana	common cis-acting element in promoter and enhancer regions
GmFtsH4	CAAT-box	CAAT	905	4	+	Nicotiana glutinosa
GmFtsH4	CAAT-box	CAAAT	919	5	-	Pisum sativum	common cis-acting element in promoter and enhancer regions
GmFtsH4	CAAT-box	CAAT	929	4	+	Nicotiana glutinosa
GmFtsH4	CAAT-box	CAAAT	1093	5	+	Pisum sativum	common cis-acting element in promoter and enhancer regions
GmFtsH4	CAAT-box	CAAAT	1096	5	-	Pisum sativum	common cis-acting element in promoter and enhancer regions
GmFtsH4	CAAT-box	CAAT	1152	4	+	Nicotiana glutinosa
GmFtsH4	CAAT-box	CAAAT	1154	5	-	Pisum sativum	common cis-acting element in promoter and enhancer regions
GmFtsH4	CAAT-box	CCAAT	1161	5	+	Arabidopsis thaliana	common cis-acting element in promoter and enhancer regions
GmFtsH4	CAAT-box	CAAT	1162	4	+	Nicotiana glutinosa
GmFtsH4	CAAT-box	CAAT	1260	4	-	Nicotiana glutinosa
GmFtsH4	CAAT-box	CCAAT	1600	5	+	Arabidopsis thaliana	common cis-acting element in promoter and enhancer regions
GmFtsH4	CAAT-box	CAAT	1601	4	+	Nicotiana glutinosa
GmFtsH4	CAAT-box	CAAT	1626	4	+	Nicotiana glutinosa
GmFtsH4	CAAT-box	CAAAT	1628	5	-	Pisum sativum	common cis-acting element in promoter and enhancer regions
GmFtsH4	CAAT-box	CAAAT	1645	5	-	Pisum sativum	common cis-acting element in promoter and enhancer regions
GmFtsH4	CAAT-box	CAAT	1658	4	+	Nicotiana glutinosa
GmFtsH4	CAAT-box	CCAAT	1720	5	+	Arabidopsis thaliana	common cis-acting element in promoter and enhancer regions
GmFtsH4	CAAT-box	CAAT	1721	4	+	Nicotiana glutinosa
GmFtsH4	CAAT-box	CAAT	1743	4	+	Nicotiana glutinosa
GmFtsH4	CAAT-box	CAAAT	1787	5	-	Pisum sativum	common cis-acting element in promoter and enhancer regions
GmFtsH4	CAAT-box	CAAAT	1876	5	-	Pisum sativum	common cis-acting element in promoter and enhancer regions
GmFtsH4	CAAT-box	CAAAT	1883	5	-	Pisum sativum	common cis-acting element in promoter and enhancer regions
GmFtsH4	CAAT-box	CAAT	1954	4	-	Nicotiana glutinosa
GmFtsH4	CAAT-box	CAAT	2056	4	-	Nicotiana glutinosa
GmFtsH4	CAAT-box	CAAT	2217	4	+	Nicotiana glutinosa
GmFtsH4	CAAT-box	CAAAT	2262	5	-	Pisum sativum	common cis-acting element in promoter and enhancer regions
GmFtsH4	CAAT-box	CAAT	2267	4	-	Nicotiana glutinosa
GmFtsH4	CAAT-box	CAAT	2276	4	-	Nicotiana glutinosa
GmFtsH4	CAAT-box	CAAT	2281	4	+	Nicotiana glutinosa
GmFtsH4	CAAT-box	CAAAT	2313	5	-	Pisum sativum	common cis-acting element in promoter and enhancer regions
GmFtsH4	CAAT-box	CCAAT	2334	5	+	Arabidopsis thaliana	common cis-acting element in promoter and enhancer regions
GmFtsH4	CAAT-box	CAAT	2335	4	+	Nicotiana glutinosa
GmFtsH4	CAAT-box	CCAAT	2337	5	-	Arabidopsis thaliana	common cis-acting element in promoter and enhancer regions
GmFtsH4	CAAT-box	CAAAT	2366	5	-	Pisum sativum	common cis-acting element in promoter and enhancer regions
GmFtsH4	CAAT-box	CAAT	2390	4	-	Nicotiana glutinosa
GmFtsH4	CAAT-box	CAAAT	2462	5	-	Pisum sativum	common cis-acting element in promoter and enhancer regions
GmFtsH4	TATA-box	ATTATA	185	6	+	Brassica napus	core promoter element around -30 of transcription start
GmFtsH4	TATA-box	TATAA	186	5	-	Arabidopsis thaliana	core promoter element around -30 of transcription start
GmFtsH4	TATA-box	TATA	187	4	+	Arabidopsis thaliana	core promoter element around -30 of transcription start
GmFtsH4	TATA-box	TATAA	287	5	-	Arabidopsis thaliana	core promoter element around -30 of transcription start
GmFtsH4	TATA-box	TATA	288	4	+	Arabidopsis thaliana	core promoter element around -30 of transcription start
GmFtsH4	TATA-box	ATATAT	401	6	+	Brassica napus	core promoter element around -30 of transcription start
GmFtsH4	TATA-box	TATA	402	4	+	Arabidopsis thaliana	core promoter element around -30 of transcription start
GmFtsH4	TATA-box	TATTTAAA	407	8	-	Arabidopsis thaliana	core promoter element around -30 of transcription start
GmFtsH4	TATA-box	ATTATA	419	6	+	Brassica napus	core promoter element around -30 of transcription start
GmFtsH4	TATA-box	TATAA	420	5	-	Arabidopsis thaliana	core promoter element around -30 of transcription start
GmFtsH4	TATA-box	TATA	421	4	+	Arabidopsis thaliana	core promoter element around -30 of transcription start
GmFtsH4	TATA-box	TATAAAT	497	7	-	Brassica juncea	core promoter element around -30 of transcription start
GmFtsH4	TATA-box	TATAAA	498	6	-	Helianthus annuus	core promoter element around -30 of transcription start
GmFtsH4	TATA-box	TATAA	499	5	-	Arabidopsis thaliana	core promoter element around -30 of transcription start
GmFtsH4	TATA-box	TATA	500	4	+	Arabidopsis thaliana	core promoter element around -30 of transcription start
GmFtsH4	TATA-box	TACATAAA	535	8	-	Oryza sativa	core promoter element around -30 of transcription start
GmFtsH4	TATA-box	TATA	702	4	+	Arabidopsis thaliana	core promoter element around -30 of transcription start
GmFtsH4	TATA-box	TATAAAA	740	7	-	Pisum sativum	core promoter element around -30 of transcription start
GmFtsH4	TATA-box	TATAAA	741	6	-	Helianthus annuus	core promoter element around -30 of transcription start
GmFtsH4	TATA-box	TATATAA	742	7	-	Arabidopsis thaliana	core promoter element around -30 of transcription start
GmFtsH4	TATA-box	TATATA	743	6	+	Arabidopsis thaliana	core promoter element around -30 of transcription start
GmFtsH4	TATA-box	ATATAA	744	6	+	Brassica oleracea	core promoter element around -30 of transcription start
GmFtsH4	TATA-box	TATA	745	4	+	Arabidopsis thaliana	core promoter element around -30 of transcription start
GmFtsH4	TATA-box	ATATAT	828	6	+	Brassica napus	core promoter element around -30 of transcription start
GmFtsH4	TATA-box	TATATA	829	6	+	Arabidopsis thaliana	core promoter element around -30 of transcription start
GmFtsH4	TATA-box	ATATAT	830	6	+	Brassica napus	core promoter element around -30 of transcription start
GmFtsH4	TATA-box	TATATA	831	6	+	Arabidopsis thaliana	core promoter element around -30 of transcription start
GmFtsH4	TATA-box	ATATAT	832	6	+	Brassica napus	core promoter element around -30 of transcription start
GmFtsH4	TATA-box	TATATA	833	6	+	Arabidopsis thaliana	core promoter element around -30 of transcription start
GmFtsH4	TATA-box	ATATAT	834	6	+	Brassica napus	core promoter element around -30 of transcription start
GmFtsH4	TATA-box	TATATA	835	6	+	Arabidopsis thaliana	core promoter element around -30 of transcription start
GmFtsH4	TATA-box	ATATAA	836	6	+	Brassica oleracea	core promoter element around -30 of transcription start
GmFtsH4	TATA-box	TATA	837	4	+	Arabidopsis thaliana	core promoter element around -30 of transcription start
GmFtsH4	TATA-box	TATATAA	848	7	-	Arabidopsis thaliana	core promoter element around -30 of transcription start
GmFtsH4	TATA-box	TATATA	849	6	+	Arabidopsis thaliana	core promoter element around -30 of transcription start
GmFtsH4	TATA-box	TATA	851	4	+	Arabidopsis thaliana	core promoter element around -30 of transcription start
GmFtsH4	TATA-box	ATATAT	876	6	+	Brassica napus	core promoter element around -30 of transcription start
GmFtsH4	TATA-box	TATATA	877	6	+	Arabidopsis thaliana	core promoter element around -30 of transcription start
GmFtsH4	TATA-box	ATATAT	878	6	+	Brassica napus	core promoter element around -30 of transcription start
GmFtsH4	TATA-box	TATATA	879	6	+	Arabidopsis thaliana	core promoter element around -30 of transcription start
GmFtsH4	TATA-box	ATATAA	880	6	+	Brassica oleracea	core promoter element around -30 of transcription start
GmFtsH4	TATA-box	TATA	881	4	+	Arabidopsis thaliana	core promoter element around -30 of transcription start
GmFtsH4	TATA-box	TATACA	1238	6	-	Helianthus annuus	core promoter element around -30 of transcription start
GmFtsH4	TATA-box	TATA	1240	4	+	Arabidopsis thaliana	core promoter element around -30 of transcription start
GmFtsH4	TATA-box	ATATAA	1603	6	+	Brassica oleracea	core promoter element around -30 of transcription start
GmFtsH4	TATA-box	TATA	1604	4	-	Arabidopsis thaliana	core promoter element around -30 of transcription start
GmFtsH4	TATA-box	ATATAT	1672	6	-	Brassica napus	core promoter element around -30 of transcription start
GmFtsH4	TATA-box	TATATA	1673	6	-	Arabidopsis thaliana	core promoter element around -30 of transcription start
GmFtsH4	TATA-box	TATA	1675	4	-	Arabidopsis thaliana	core promoter element around -30 of transcription start
GmFtsH4	TATA-box	TACAAAA	1773	7	-	Oryza sativa	core promoter element around -30 of transcription start
GmFtsH4	TATA-box	ATATAT	1783	6	-	Brassica napus	core promoter element around -30 of transcription start
GmFtsH4	TATA-box	TATA	1784	4	-	Arabidopsis thaliana	core promoter element around -30 of transcription start
GmFtsH4	TATA-box	ccTATAAAaa	2155	9	-	Arabidopsis thaliana	core promoter element around -30 of transcription start
GmFtsH4	TATA-box	ATATAT	2443	6	-	Brassica napus	core promoter element around -30 of transcription start
GmFtsH4	TATA-box	TATA	2444	4	-	Arabidopsis thaliana	core promoter element around -30 of transcription start
GmFtsH4	GCN4_motif	TGAGTCA	1807	7	+	Oryza sativa	cis-regulatory element involved in endosperm expression
GmFtsH4	MYB-like sequence	TAACCA	355	6	+	Arabidopsis thaliana
GmFtsH4	CAT-box	GCCACT	1417	6	+	Arabidopsis thaliana	cis-acting regulatory element related to meristem expression
GmFtsH4	TCA-element	CCATCTTTTT	1832	9	-	Nicotiana tabacum	cis-acting element involved in salicylic acid responsiveness
GmFtsH4	TGA-element	AACGAC	1568	6	+	Brassica oleracea	auxin-responsive element
GmFtsH4	STRE	AGGGG	2146	5	-	Arabidopsis thaliana
GmFtsH4	O2-site	GATGACATGG	297	9	-	Zea mays	cis-acting regulatory element involved in zein metabolism regulation
GmFtsH4	LTR	CCGAAA	2033	6	+	Hordeum vulgare	cis-acting element involved in low-temperature responsiveness
GmFtsH4	MRE	AACCTAA	632	7	-	Petroselinum crispum	MYB binding site involved in light responsiveness
GmFtsH4	CGTCA-motif	CGTCA	1375	5	-	Hordeum vulgare	cis-acting regulatory element involved in the MeJA-responsiveness
GmFtsH4	GATA-motif	AAGGATAAGG	285	9	-	Solanum tuberosum	part of a light responsive element
GmFtsH4	Myb-binding site	CAACAG	515	6	-	Nicotiana tabacum
GmFtsH4	G-Box	CACGTG	1203	6	+	Pisum sativum	cis-acting regulatory element involved in light responsiveness
GmFtsH4	G-Box	CACGTT	1793	6	-	Pisum sativum	cis-acting regulatory element involved in light responsiveness
GmFtsH4	G-Box	CACGTG	2017	6	-	Pisum sativum	cis-acting regulatory element involved in light responsiveness
GmFtsH4	MYB	TAACCA	355	6	+	Arabidopsis thaliana
GmFtsH4	MYB	CAACAG	515	6	-	Arabidopsis thaliana
GmFtsH4	MYB	CAACCA	1853	6	-	Arabidopsis thaliana
GmFtsH4	MYC	CATGTG	230	6	+	Arabidopsis thaliana
GmFtsH4	MYC	CATTTG	477	6	+	Arabidopsis thaliana
GmFtsH4	MYC	CATTTG	1875	6	+	Arabidopsis thaliana
GmFtsH4	MYC	CATTTG	1882	6	+	Arabidopsis thaliana
GmFtsH4	MYC	CAATTG	2335	6	-	Arabidopsis thaliana
GmFtsH4	Box 4	ATTAAT	446	6	+	Petroselinum crispum	part of a conserved DNA module involved in light responsiveness
GmFtsH4	Box 4	ATTAAT	466	6	+	Petroselinum crispum	part of a conserved DNA module involved in light responsiveness
GmFtsH4	Box 4	ATTAAT	591	6	+	Petroselinum crispum	part of a conserved DNA module involved in light responsiveness
GmFtsH4	MBS	CAACTG	1192	6	+	Arabidopsis thaliana	MYB binding site involved in drought-inducibility
GmFtsH4	Myb	CAACTG	1192	6	+	Arabidopsis thaliana
GmFtsH4	chs-CMA1a	TTACTTAA	763	8	-	Daucus carota	part of a light responsive element
GmFtsH4	ARE	AAACCA	134	6	+	Zea mays	cis-acting regulatory element essential for the anaerobic induction
GmFtsH4	ARE	AAACCA	817	6	+	Zea mays	cis-acting regulatory element essential for the anaerobic induction
GmFtsH4	ARE	AAACCA	1381	6	+	Zea mays	cis-acting regulatory element essential for the anaerobic induction
GmFtsH4	ARE	AAACCA	1717	6	+	Zea mays	cis-acting regulatory element essential for the anaerobic induction
GmFtsH4	ERE	ATTTTAAA	405	8	+	Nicotiana glutinos
GmFtsH4	ERE	ATTTTAAA	598	8	+	Nicotiana glutinos
GmFtsH4	ERE	ATTTTAAA	749	8	+	Nicotiana glutinos
GmFtsH4	ERE	ATTTTAAA	861	8	-	Nicotiana glutinos
GmFtsH4	ERE	ATTTTAAA	1751	8	-	Nicotiana glutinos
GmFtsH5	Box II	TGGTAATAA	1739	9	-	Solanum tuberosum	part of a light responsive element
GmFtsH5	ABRE	CGTACGTGCA	671	9	-	Hordeum vulgare	cis-acting element involved in the abscisic acid responsiveness
GmFtsH5	ABRE	ACGTG	1764	5	+	Arabidopsis thaliana	cis-acting element involved in the abscisic acid responsiveness
GmFtsH5	ABRE	ACGTG	1948	5	+	Arabidopsis thaliana	cis-acting element involved in the abscisic acid responsiveness
GmFtsH5	ACE	CTAACGTATT	1105	9	-	Petroselinum crispum	cis-acting element involved in light responsiveness
GmFtsH5	ARE	AAACCA	557	6	+	Zea mays	cis-acting regulatory element essential for the anaerobic induction
GmFtsH5	WRE3	CCACCT	1086	6	+	Pisum sativum
GmFtsH5	GT1-motif	GGTTAA	1276	6	+	Arabidopsis thaliana	light responsive element
GmFtsH5	GT1-motif	GGTTAA	1961	6	-	Arabidopsis thaliana	light responsive element
GmFtsH5	G-Box	CACGTT	1763	6	-	Pisum sativum	cis-acting regulatory element involved in light responsiveness
GmFtsH5	G-Box	CACGTT	1947	6	-	Pisum sativum	cis-acting regulatory element involved in light responsiveness
GmFtsH5	Myc	TCTCTTA	1498	7	-	Arabidopsis thaliana
GmFtsH5	CAAT-box	CAAAT	22	5	+	Pisum sativum	common cis-acting element in promoter and enhancer regions
GmFtsH5	CAAT-box	CCCAATTT	36	8	+	Arabidopsis thaliana	common cis-acting element in promoter and enhancer regions
GmFtsH5	CAAT-box	CCAAT	37	5	+	Arabidopsis thaliana	common cis-acting element in promoter and enhancer regions
GmFtsH5	CAAT-box	CAAT	38	4	+	Nicotiana glutinosa
GmFtsH5	CAAT-box	CAAAT	40	5	-	Pisum sativum	common cis-acting element in promoter and enhancer regions
GmFtsH5	CAAT-box	CAAT	70	4	-	Nicotiana glutinosa
GmFtsH5	CAAT-box	CAAT	171	4	+	Nicotiana glutinosa
GmFtsH5	CAAT-box	CAAT	269	4	+	Nicotiana glutinosa
GmFtsH5	CAAT-box	CAAT	332	4	-	Nicotiana glutinosa
GmFtsH5	CAAT-box	CCAAT	436	5	-	Arabidopsis thaliana	common cis-acting element in promoter and enhancer regions
GmFtsH5	CAAT-box	CAAAT	551	5	+	Pisum sativum	common cis-acting element in promoter and enhancer regions
GmFtsH5	CAAT-box	CAAT	654	4	+	Nicotiana glutinosa
GmFtsH5	CAAT-box	CAAT	721	4	+	Nicotiana glutinosa
GmFtsH5	CAAT-box	CCAAT	723	5	-	Arabidopsis thaliana	common cis-acting element in promoter and enhancer regions
GmFtsH5	CAAT-box	CAAT	811	4	-	Nicotiana glutinosa
GmFtsH5	CAAT-box	CAAT	836	4	+	Nicotiana glutinosa
GmFtsH5	CAAT-box	CAAT	908	4	-	Nicotiana glutinosa
GmFtsH5	CAAT-box	CAAAT	942	5	+	Pisum sativum	common cis-acting element in promoter and enhancer regions
GmFtsH5	CAAT-box	CAAT	994	4	-	Nicotiana glutinosa
GmFtsH5	CAAT-box	CAAT	1001	4	+	Nicotiana glutinosa
GmFtsH5	CAAT-box	CAAT	1016	4	-	Nicotiana glutinosa
GmFtsH5	CAAT-box	CAAAT	1049	5	-	Pisum sativum	common cis-acting element in promoter and enhancer regions
GmFtsH5	CAAT-box	CAAT	1139	4	-	Nicotiana glutinosa
GmFtsH5	CAAT-box	CAAAT	1160	5	-	Pisum sativum	common cis-acting element in promoter and enhancer regions
GmFtsH5	CAAT-box	CAAAT	1188	5	-	Pisum sativum	common cis-acting element in promoter and enhancer regions
GmFtsH5	CAAT-box	CAAT	1213	4	-	Nicotiana glutinosa
GmFtsH5	CAAT-box	CAAT	1349	4	+	Nicotiana glutinosa
GmFtsH5	CAAT-box	CAAT	1393	4	-	Nicotiana glutinosa
GmFtsH5	CAAT-box	CAAAT	1457	5	-	Pisum sativum	common cis-acting element in promoter and enhancer regions
GmFtsH5	CAAT-box	CAAT	1493	4	+	Nicotiana glutinosa
GmFtsH5	CAAT-box	CCAAT	1535	5	-	Arabidopsis thaliana	common cis-acting element in promoter and enhancer regions
GmFtsH5	CAAT-box	CAAT	1561	4	-	Nicotiana glutinosa
GmFtsH5	CAAT-box	CAAAT	1822	5	-	Pisum sativum	common cis-acting element in promoter and enhancer regions
GmFtsH5	CAAT-box	CAAT	1837	4	-	Nicotiana glutinosa
GmFtsH5	CAAT-box	CAAAT	1956	5	-	Pisum sativum	common cis-acting element in promoter and enhancer regions
GmFtsH5	CAAT-box	CAAT	1968	4	+	Nicotiana glutinosa
GmFtsH5	CAAT-box	CAAAT	1992	5	-	Pisum sativum	common cis-acting element in promoter and enhancer regions
GmFtsH5	Box 4	ATTAAT	978	6	+	Petroselinum crispum	part of a conserved DNA module involved in light responsiveness
GmFtsH5	Box 4	ATTAAT	1552	6	-	Petroselinum crispum	part of a conserved DNA module involved in light responsiveness
GmFtsH5	WUN-motif	AAATTTCTT	1684	9	-	Nicotiana glutinosa
GmFtsH5	WUN-motif	AAATTTCTT	1910	9	-	Nicotiana glutinosa
GmFtsH5	ERE	ATTTTAAA	1385	8	+	Nicotiana glutinos
GmFtsH5	ERE	ATTTTAAA	1387	8	-	Nicotiana glutinos
GmFtsH5	chs-CMA2b	GAACCTACACAC	192	11	-	Hordeum vulgare	part of a light responsive element
GmFtsH5	MYB	TAACCA	1275	6	-	Arabidopsis thaliana
GmFtsH5	TATA	TATAAAAT	1371	8	-	Arabidopsis thaliana
GmFtsH5	TATA	TATAAAAT	1375	8	+	Arabidopsis thaliana
GmFtsH5	MYC	CATTTG	22	6	-	Arabidopsis thaliana
GmFtsH5	MYC	CATGTG	367	6	+	Arabidopsis thaliana
GmFtsH5	MYC	CATTTG	551	6	-	Arabidopsis thaliana
GmFtsH5	MYC	CAATTG	721	6	+	Arabidopsis thaliana
GmFtsH5	MYC	CATTTG	1955	6	+	Arabidopsis thaliana
GmFtsH5	MYB-like sequence	TAACCA	1275	6	-	Arabidopsis thaliana
GmFtsH5	CGTCA-motif	CGTCA	1217	5	+	Hordeum vulgare	cis-acting regulatory element involved in the MeJA-responsiveness
GmFtsH5	CGTCA-motif	CGTCA	1577	5	+	Hordeum vulgare	cis-acting regulatory element involved in the MeJA-responsiveness
GmFtsH5	AT~TATA-box	TATATA	984	6	+	Arabidopsis thaliana
GmFtsH5	AT~TATA-box	TATATAAA	1181	8	-	Arabidopsis thaliana
GmFtsH5	AT~TATA-box	TATATA	1183	6	-	Arabidopsis thaliana
GmFtsH5	AT~TATA-box	TATATA	1770	6	-	Arabidopsis thaliana
GmFtsH5	TCA-element	CCATCTTTTT	560	10	+	Nicotiana tabacum	cis-acting element involved in salicylic acid responsiveness
GmFtsH5	CAG-motif	GAAAGGCAGAC	1612	10	-	Arabidopsis thaliana	part of a light response element
GmFtsH5	TGACG-motif	TGACG	1217	5	-	Hordeum vulgare	cis-acting regulatory element involved in the MeJA-responsiveness
GmFtsH5	TGACG-motif	TGACG	1577	5	-	Hordeum vulgare	cis-acting regulatory element involved in the MeJA-responsiveness
GmFtsH5	TCCC-motif	TCTCCCT	1613	7	+	Spinacia oleracea	part of a light responsive element
GmFtsH5	TCT-motif	TCTTAC	784	6	+	Arabidopsis thaliana	part of a light responsive element
GmFtsH5	TCT-motif	TCTTAC	1497	6	-	Arabidopsis thaliana	part of a light responsive element
GmFtsH5	TATA-box	TATA	235	4	+	Arabidopsis thaliana	core promoter element around -30 of transcription start
GmFtsH5	TATA-box	TATA	328	4	+	Arabidopsis thaliana	core promoter element around -30 of transcription start
GmFtsH5	TATA-box	TATAA	537	5	-	Arabidopsis thaliana	core promoter element around -30 of transcription start
GmFtsH5	TATA-box	TATA	538	4	+	Arabidopsis thaliana	core promoter element around -30 of transcription start
GmFtsH5	TATA-box	TATA	642	4	+	Arabidopsis thaliana	core promoter element around -30 of transcription start
GmFtsH5	TATA-box	TATACA	657	6	-	Helianthus annuus	core promoter element around -30 of transcription start
GmFtsH5	TATA-box	TATA	659	4	+	Arabidopsis thaliana	core promoter element around -30 of transcription start
GmFtsH5	TATA-box	TACAAAA	771	7	-	Oryza sativa	core promoter element around -30 of transcription start
GmFtsH5	TATA-box	ccTATAAAaa	857	9	+	Arabidopsis thaliana	core promoter element around -30 of transcription start
GmFtsH5	TATA-box	ATATAA	858	6	+	Brassica oleracea	core promoter element around -30 of transcription start
GmFtsH5	TATA-box	TATA	859	4	+	Arabidopsis thaliana	core promoter element around -30 of transcription start
GmFtsH5	TATA-box	ATTATA	982	6	+	Brassica napus	core promoter element around -30 of transcription start
GmFtsH5	TATA-box	TATATAA	983	7	-	Arabidopsis thaliana	core promoter element around -30 of transcription start
GmFtsH5	TATA-box	TATATA	984	6	+	Arabidopsis thaliana	core promoter element around -30 of transcription start
GmFtsH5	TATA-box	ATATAT	985	6	+	Brassica napus	core promoter element around -30 of transcription start
GmFtsH5	TATA-box	TATA	986	4	+	Arabidopsis thaliana	core promoter element around -30 of transcription start
GmFtsH5	TATA-box	ATTATA	1155	6	+	Brassica napus	core promoter element around -30 of transcription start
GmFtsH5	TATA-box	TATAA	1156	5	-	Arabidopsis thaliana	core promoter element around -30 of transcription start
GmFtsH5	TATA-box	TATA	1157	4	-	Arabidopsis thaliana	core promoter element around -30 of transcription start
GmFtsH5	TATA-box	TATAAAA	1180	7	-	Pisum sativum	core promoter element around -30 of transcription start
GmFtsH5	TATA-box	TATAAA	1181	6	-	Helianthus annuus	core promoter element around -30 of transcription start
GmFtsH5	TATA-box	TATATAA	1182	7	-	Arabidopsis thaliana	core promoter element around -30 of transcription start
GmFtsH5	TATA-box	TATATA	1183	6	-	Arabidopsis thaliana	core promoter element around -30 of transcription start
GmFtsH5	TATA-box	ATATAT	1184	6	-	Brassica napus	core promoter element around -30 of transcription start
GmFtsH5	TATA-box	TATA	1185	4	-	Arabidopsis thaliana	core promoter element around -30 of transcription start
GmFtsH5	TATA-box	TAAAGATT	1353	8	-	Arabidopsis thaliana	core promoter element around -30 of transcription start
GmFtsH5	TATA-box	TATAAAA	1372	7	-	Pisum sativum	core promoter element around -30 of transcription start
GmFtsH5	TATA-box	TATAAA	1373	6	-	Helianthus annuus	core promoter element around -30 of transcription start
GmFtsH5	TATA-box	TATAA	1374	5	-	Arabidopsis thaliana	core promoter element around -30 of transcription start
GmFtsH5	TATA-box	TATA	1375	4	-	Arabidopsis thaliana	core promoter element around -30 of transcription start
GmFtsH5	TATA-box	TATA	1398	4	-	Arabidopsis thaliana	core promoter element around -30 of transcription start
GmFtsH5	TATA-box	ATTATA	1438	6	+	Brassica napus	core promoter element around -30 of transcription start
GmFtsH5	TATA-box	TATAA	1439	5	-	Arabidopsis thaliana	core promoter element around -30 of transcription start
GmFtsH5	TATA-box	TATA	1440	4	-	Arabidopsis thaliana	core promoter element around -30 of transcription start
GmFtsH5	TATA-box	ATATAT	1484	6	-	Brassica napus	core promoter element around -30 of transcription start
GmFtsH5	TATA-box	TATA	1485	4	-	Arabidopsis thaliana	core promoter element around -30 of transcription start
GmFtsH5	TATA-box	ATATAA	1513	6	+	Brassica oleracea	core promoter element around -30 of transcription start
GmFtsH5	TATA-box	TATA	1514	4	-	Arabidopsis thaliana	core promoter element around -30 of transcription start
GmFtsH5	TATA-box	TATA	1540	4	-	Arabidopsis thaliana	core promoter element around -30 of transcription start
GmFtsH5	TATA-box	TATAA	1592	5	-	Arabidopsis thaliana	core promoter element around -30 of transcription start
GmFtsH5	TATA-box	TATATTTATATTT	1593	12	+	Avena sativa	core promoter element around -30 of transcription start
GmFtsH5	TATA-box	ATTATA	1644	6	+	Brassica napus	core promoter element around -30 of transcription start
GmFtsH5	TATA-box	TATAA	1645	5	-	Arabidopsis thaliana	core promoter element around -30 of transcription start
GmFtsH5	TATA-box	TATA	1646	4	-	Arabidopsis thaliana	core promoter element around -30 of transcription start
GmFtsH5	TATA-box	TATAAGAA	1666	8	-	Zea mays	core promoter element around -30 of transcription start
GmFtsH5	TATA-box	TATAA	1669	5	-	Arabidopsis thaliana	core promoter element around -30 of transcription start
GmFtsH5	TATA-box	TATA	1670	4	-	Arabidopsis thaliana	core promoter element around -30 of transcription start
GmFtsH5	TATA-box	TATA	1717	4	-	Arabidopsis thaliana	core promoter element around -30 of transcription start
GmFtsH5	TATA-box	ATTATA	1721	6	+	Brassica napus	core promoter element around -30 of transcription start
GmFtsH5	TATA-box	TATAA	1722	5	-	Arabidopsis thaliana	core promoter element around -30 of transcription start
GmFtsH5	TATA-box	TATA	1723	4	-	Arabidopsis thaliana	core promoter element around -30 of transcription start
GmFtsH5	TATA-box	TATA	1728	4	-	Arabidopsis thaliana	core promoter element around -30 of transcription start
GmFtsH5	TATA-box	ATATAT	1769	6	-	Brassica napus	core promoter element around -30 of transcription start
GmFtsH5	TATA-box	TATATA	1770	6	-	Arabidopsis thaliana	core promoter element around -30 of transcription start
GmFtsH5	TATA-box	ATATAT	1771	6	-	Brassica napus	core promoter element around -30 of transcription start
GmFtsH5	TATA-box	TATA	1772	4	-	Arabidopsis thaliana	core promoter element around -30 of transcription start
GmFtsH5	TATA-box	ATTATA	1784	6	+	Brassica napus	core promoter element around -30 of transcription start
GmFtsH5	TATA-box	TATAA	1785	5	-	Arabidopsis thaliana	core promoter element around -30 of transcription start
GmFtsH5	TATA-box	TATA	1786	4	-	Arabidopsis thaliana	core promoter element around -30 of transcription start
GmFtsH5	TATA-box	ATTATA	1791	6	+	Brassica napus	core promoter element around -30 of transcription start
GmFtsH5	TATA-box	TATAA	1792	5	-	Arabidopsis thaliana	core promoter element around -30 of transcription start
GmFtsH5	TATA-box	TATA	1793	4	-	Arabidopsis thaliana	core promoter element around -30 of transcription start
GmFtsH5	W box	TTGACC	403	6	-	Arabidopsis thaliana
GmFtsH6	WRE3	CCACCT	97	6	+	Pisum sativum
GmFtsH6	WRE3	CCACCT	408	6	+	Pisum sativum
GmFtsH6	WRE3	CCACCT	721	6	-	Pisum sativum
GmFtsH6	WRE3	CCACCT	785	6	-	Pisum sativum
GmFtsH6	WRE3	CCACCT	1070	6	-	Pisum sativum
GmFtsH6	ARE	AAACCA	691	6	-	Zea mays	cis-acting regulatory element essential for the anaerobic induction
GmFtsH6	ARE	AAACCA	1430	6	-	Zea mays	cis-acting regulatory element essential for the anaerobic induction
GmFtsH6	ARE	AAACCA	1573	6	+	Zea mays	cis-acting regulatory element essential for the anaerobic induction
GmFtsH6	MBS	CAACTG	1565	6	+	Arabidopsis thaliana	MYB binding site involved in drought-inducibility
GmFtsH6	MBS	CAACTG	1896	6	-	Arabidopsis thaliana	MYB binding site involved in drought-inducibility
GmFtsH6	G-box	TACGTG	145	6	+	Arabidopsis thaliana	cis-acting regulatory element involved in light responsiveness
GmFtsH6	G-box	CACGAC	282	6	+	Zea mays	cis-acting regulatory element involved in light responsiveness
GmFtsH6	G-box	CACGAC	610	6	-	Zea mays	cis-acting regulatory element involved in light responsiveness
GmFtsH6	G-box	CACGTC	1032	6	-	Zea mays	cis-acting regulatory element involved in light responsiveness
GmFtsH6	STRE	AGGGG	414	5	-	Arabidopsis thaliana
GmFtsH6	STRE	AGGGG	480	5	-	Arabidopsis thaliana
GmFtsH6	STRE	AGGGG	561	5	-	Arabidopsis thaliana
GmFtsH6	STRE	AGGGG	642	5	-	Arabidopsis thaliana
GmFtsH6	STRE	AGGGG	772	5	+	Arabidopsis thaliana
GmFtsH6	STRE	AGGGG	1109	5	-	Arabidopsis thaliana
GmFtsH6	STRE	AGGGG	1534	5	+	Arabidopsis thaliana
GmFtsH6	ERE	ATTTTAAA	260	8	-	Nicotiana glutinos
GmFtsH6	ERE	ATTTCATA	956	8	-	Nicotiana glutinos
GmFtsH6	ERE	ATTTTAAA	1019	8	+	Nicotiana glutinos
GmFtsH6	ERE	ATTTTAAA	1511	8	+	Nicotiana glutinos
GmFtsH6	ERE	ATTTTAAA	1692	8	+	Nicotiana glutinos
GmFtsH6	ERE	ATTTTAAA	1694	8	-	Nicotiana glutinos
GmFtsH6	ERE	ATTTCATA	1847	8	-	Nicotiana glutinos
GmFtsH6	AT-rich sequence	TAAAATACT	1689	9	-	Pisum sativum	element for maximal elicitor-mediated activation (2copies)
GmFtsH6	G-Box	CACGTT	1151	6	+	Pisum sativum	cis-acting regulatory element involved in light responsiveness
GmFtsH6	G-Box	CACGTT	1987	6	-	Pisum sativum	cis-acting regulatory element involved in light responsiveness
GmFtsH6	Sp1	GGGCGG	465	6	-	Oryza sativa	light responsive element
GmFtsH6	MYC	CATTTG	1415	6	+	Arabidopsis thaliana
GmFtsH6	MYC	CATTTG	1577	6	+	Arabidopsis thaliana
GmFtsH6	CGTCA-motif	CGTCA	1031	5	-	Hordeum vulgare	cis-acting regulatory element involved in the MeJA-responsiveness
GmFtsH6	CAAT-box	CAAT	32	4	-	Nicotiana glutinosa
GmFtsH6	CAAT-box	CCAAT	233	5	+	Arabidopsis thaliana	common cis-acting element in promoter and enhancer regions
GmFtsH6	CAAT-box	CAAT	234	4	+	Nicotiana glutinosa
GmFtsH6	CAAT-box	CAAT	321	4	+	Nicotiana glutinosa
GmFtsH6	CAAT-box	CCAAT	331	5	+	Arabidopsis thaliana	common cis-acting element in promoter and enhancer regions
GmFtsH6	CAAT-box	CAAT	332	4	+	Nicotiana glutinosa
GmFtsH6	CAAT-box	CAAT	500	4	-	Nicotiana glutinosa
GmFtsH6	CAAT-box	CAAAT	580	5	+	Pisum sativum	common cis-acting element in promoter and enhancer regions
GmFtsH6	CAAT-box	CAAT	657	4	-	Nicotiana glutinosa
GmFtsH6	CAAT-box	CAAAT	766	5	-	Pisum sativum	common cis-acting element in promoter and enhancer regions
GmFtsH6	CAAT-box	CCAAT	874	5	-	Arabidopsis thaliana	common cis-acting element in promoter and enhancer regions
GmFtsH6	CAAT-box	CAAT	1007	4	-	Nicotiana glutinosa
GmFtsH6	CAAT-box	CAAAT	1028	5	-	Pisum sativum	common cis-acting element in promoter and enhancer regions
GmFtsH6	CAAT-box	CAAT	1138	4	+	Nicotiana glutinosa
GmFtsH6	CAAT-box	CAAAT	1208	5	-	Pisum sativum	common cis-acting element in promoter and enhancer regions
GmFtsH6	CAAT-box	CAAT	1295	4	+	Nicotiana glutinosa
GmFtsH6	CAAT-box	CAAAT	1347	5	-	Pisum sativum	common cis-acting element in promoter and enhancer regions
GmFtsH6	CAAT-box	CCAAT	1381	5	+	Arabidopsis thaliana	common cis-acting element in promoter and enhancer regions
GmFtsH6	CAAT-box	CAAT	1382	4	+	Nicotiana glutinosa
GmFtsH6	CAAT-box	CAAT	1409	4	+	Nicotiana glutinosa
GmFtsH6	CAAT-box	CAAAT	1416	5	-	Pisum sativum	common cis-acting element in promoter and enhancer regions
GmFtsH6	CAAT-box	CCAAT	1428	5	-	Arabidopsis thaliana	common cis-acting element in promoter and enhancer regions
GmFtsH6	CAAT-box	CAAT	1509	4	+	Nicotiana glutinosa
GmFtsH6	CAAT-box	CAAAT	1578	5	-	Pisum sativum	common cis-acting element in promoter and enhancer regions
GmFtsH6	CAAT-box	CAAT	1605	4	+	Nicotiana glutinosa
GmFtsH6	CAAT-box	CAAT	1623	4	+	Nicotiana glutinosa
GmFtsH6	CAAT-box	CAAT	1654	4	-	Nicotiana glutinosa
GmFtsH6	CAAT-box	CAAT	1668	4	+	Nicotiana glutinosa
GmFtsH6	CAAT-box	CAAT	1700	4	-	Nicotiana glutinosa
GmFtsH6	CAAT-box	CAAT	1739	4	-	Nicotiana glutinosa
GmFtsH6	CAAT-box	CAAAT	1764	5	-	Pisum sativum	common cis-acting element in promoter and enhancer regions
GmFtsH6	CAAT-box	CAAT	1868	4	-	Nicotiana glutinosa
GmFtsH6	MYB	CAACCA	66	6	+	Arabidopsis thaliana
GmFtsH6	MYB	CAACAG	353	6	-	Arabidopsis thaliana
GmFtsH6	AT-rich element	ATAGAAATCAA	23	10	-	Glycine max	binding site of AT-rich DNA binding protein (ATBP-1)
GmFtsH6	TCA-element	CCATCTTTTT	684	9	-	Nicotiana tabacum	cis-acting element involved in salicylic acid responsiveness
GmFtsH6	TCCC-motif	TCTCCCT	572	7	+	Spinacia oleracea	part of a light responsive element
GmFtsH6	Box 4	ATTAAT	1842	6	-	Petroselinum crispum	part of a conserved DNA module involved in light responsiveness
GmFtsH6	Box 4	ATTAAT	1859	6	-	Petroselinum crispum	part of a conserved DNA module involved in light responsiveness
GmFtsH6	Box 4	ATTAAT	1875	6	-	Petroselinum crispum	part of a conserved DNA module involved in light responsiveness
GmFtsH6	GC-motif	CCCCCG	468	6	+	Zea mays	enhancer-like element involved in anoxic specific inducibility
GmFtsH6	GC-motif	CCCCCG	551	6	+	Zea mays	enhancer-like element involved in anoxic specific inducibility
GmFtsH6	ABRE	ACGTG	146	5	+	Arabidopsis thaliana	cis-acting element involved in the abscisic acid responsiveness
GmFtsH6	ABRE	ACGTG	1033	5	+	Arabidopsis thaliana	cis-acting element involved in the abscisic acid responsiveness
GmFtsH6	ABRE	ACGTG	1151	5	-	Arabidopsis thaliana	cis-acting element involved in the abscisic acid responsiveness
GmFtsH6	ABRE	ACGTG	1988	5	+	Arabidopsis thaliana	cis-acting element involved in the abscisic acid responsiveness
GmFtsH6	Myb	TAACTG	1550	6	+	Arabidopsis thaliana
GmFtsH6	Myb	CAACTG	1565	6	+	Arabidopsis thaliana
GmFtsH6	Myb	CAACTG	1896	6	-	Arabidopsis thaliana
GmFtsH6	GATA-motif	AAGGATAAGG	1114	9	-	Solanum tuberosum	part of a light responsive element
GmFtsH6	Myb-binding site	CAACAG	353	6	-	Nicotiana tabacum
GmFtsH6	W box	TTGACC	1301	6	+	Arabidopsis thaliana
GmFtsH6	AT~TATA-box	TATATA	964	6	+	Arabidopsis thaliana
GmFtsH6	AT~TATA-box	TATATA	966	6	+	Arabidopsis thaliana
GmFtsH6	AT~TATA-box	TATATAAA	976	8	-	Arabidopsis thaliana
GmFtsH6	AT~TATA-box	TATATA	978	6	+	Arabidopsis thaliana
GmFtsH6	WUN-motif	AAATTTCTT	1957	9	-	Nicotiana glutinosa
GmFtsH6	P-box	CCTTTTG	1556	7	-	Oryza sativa	gibberellin-responsive element
GmFtsH6	TATA-box	TATA	219	4	+	Arabidopsis thaliana	core promoter element around -30 of transcription start
GmFtsH6	TATA-box	ATTATA	962	6	+	Brassica napus	core promoter element around -30 of transcription start
GmFtsH6	TATA-box	TATATAA	963	7	-	Arabidopsis thaliana	core promoter element around -30 of transcription start
GmFtsH6	TATA-box	TATATA	964	6	+	Arabidopsis thaliana	core promoter element around -30 of transcription start
GmFtsH6	TATA-box	ATATAT	965	6	+	Brassica napus	core promoter element around -30 of transcription start
GmFtsH6	TATA-box	TATATA	966	6	+	Arabidopsis thaliana	core promoter element around -30 of transcription start
GmFtsH6	TATA-box	ATATAA	967	6	+	Brassica oleracea	core promoter element around -30 of transcription start
GmFtsH6	TATA-box	TATA	968	4	+	Arabidopsis thaliana	core promoter element around -30 of transcription start
GmFtsH6	TATA-box	TATAAAA	975	7	-	Pisum sativum	core promoter element around -30 of transcription start
GmFtsH6	TATA-box	TATAAA	976	6	-	Helianthus annuus	core promoter element around -30 of transcription start
GmFtsH6	TATA-box	TATATAA	977	7	-	Arabidopsis thaliana	core promoter element around -30 of transcription start
GmFtsH6	TATA-box	TATATA	978	6	+	Arabidopsis thaliana	core promoter element around -30 of transcription start
GmFtsH6	TATA-box	ATATAT	979	6	+	Brassica napus	core promoter element around -30 of transcription start
GmFtsH6	TATA-box	TATA	980	4	+	Arabidopsis thaliana	core promoter element around -30 of transcription start
GmFtsH6	TATA-box	ATATAA	1610	6	+	Brassica oleracea	core promoter element around -30 of transcription start
GmFtsH6	TATA-box	TATA	1611	4	-	Arabidopsis thaliana	core promoter element around -30 of transcription start
GmFtsH6	TATA-box	TATA	1705	4	-	Arabidopsis thaliana	core promoter element around -30 of transcription start
GmFtsH6	TATA-box	ATTATA	1745	6	+	Brassica napus	core promoter element around -30 of transcription start
GmFtsH6	TATA-box	TATAA	1746	5	-	Arabidopsis thaliana	core promoter element around -30 of transcription start
GmFtsH6	TATA-box	TATA	1747	4	-	Arabidopsis thaliana	core promoter element around -30 of transcription start
GmFtsH6	TATA-box	ccTATAAAaa	1786	9	+	Arabidopsis thaliana	core promoter element around -30 of transcription start
GmFtsH6	TATA-box	TATA	1788	4	-	Arabidopsis thaliana	core promoter element around -30 of transcription start
GmFtsH6	TATA-box	TATTTAAA	1926	8	-	Arabidopsis thaliana	core promoter element around -30 of transcription start
GmFtsH6	TGACG-motif	TGACG	1031	5	+	Hordeum vulgare	cis-acting regulatory element involved in the MeJA-responsiveness
GmFtsH7	MYB	TAACCA	818	6	+	Arabidopsis thaliana
GmFtsH7	MYB	CAACCA	860	6	+	Arabidopsis thaliana
GmFtsH7	MYB	TAACCA	1335	6	+	Arabidopsis thaliana
GmFtsH7	AE-box	AGAAACTT	772	8	-	Arabidopsis thaliana	part of a module for light response
GmFtsH7	TATA-box	TATAA	573	5	-	Arabidopsis thaliana	core promoter element around -30 of transcription start
GmFtsH7	TATA-box	TATA	574	4	+	Arabidopsis thaliana	core promoter element around -30 of transcription start
GmFtsH7	TATA-box	TATAAGAA	779	8	-	Zea mays	core promoter element around -30 of transcription start
GmFtsH7	TATA-box	TATAA	782	5	-	Arabidopsis thaliana	core promoter element around -30 of transcription start
GmFtsH7	TATA-box	TATA	783	4	+	Arabidopsis thaliana	core promoter element around -30 of transcription start
GmFtsH7	TATA-box	ATATAA	823	6	+	Brassica oleracea	core promoter element around -30 of transcription start
GmFtsH7	TATA-box	TATA	824	4	+	Arabidopsis thaliana	core promoter element around -30 of transcription start
GmFtsH7	TATA-box	TATA	984	4	+	Arabidopsis thaliana	core promoter element around -30 of transcription start
GmFtsH7	TATA-box	TATA	1065	4	-	Arabidopsis thaliana	core promoter element around -30 of transcription start
GmFtsH7	CAAT-box	CAAAT	26	5	-	Pisum sativum	common cis-acting element in promoter and enhancer regions
GmFtsH7	CAAT-box	CCAAT	69	5	+	Arabidopsis thaliana	common cis-acting element in promoter and enhancer regions
GmFtsH7	CAAT-box	CAAT	70	4	+	Nicotiana glutinosa
GmFtsH7	CAAT-box	CAAT	132	4	+	Nicotiana glutinosa
GmFtsH7	CAAT-box	CCAAT	152	5	+	Arabidopsis thaliana	common cis-acting element in promoter and enhancer regions
GmFtsH7	CAAT-box	CAAT	153	4	+	Nicotiana glutinosa
GmFtsH7	CAAT-box	CAAT	174	4	+	Nicotiana glutinosa
GmFtsH7	CAAT-box	CAAT	284	4	+	Nicotiana glutinosa
GmFtsH7	CAAT-box	CAAT	792	4	+	Nicotiana glutinosa
GmFtsH7	CAAT-box	CAAT	882	4	-	Nicotiana glutinosa
GmFtsH7	CAAT-box	CAAAT	943	5	-	Pisum sativum	common cis-acting element in promoter and enhancer regions
GmFtsH7	CAAT-box	CAAT	1049	4	+	Nicotiana glutinosa
GmFtsH7	CAAT-box	CAAAT	1083	5	+	Pisum sativum	common cis-acting element in promoter and enhancer regions
GmFtsH7	CAAT-box	CCAAT	1200	5	+	Arabidopsis thaliana	common cis-acting element in promoter and enhancer regions
GmFtsH7	CAAT-box	CAAT	1201	4	+	Nicotiana glutinosa
GmFtsH7	CAAT-box	CAAT	1217	4	-	Nicotiana glutinosa
GmFtsH7	CAAT-box	CAAT	1225	4	+	Nicotiana glutinosa
GmFtsH7	CAAT-box	CCAAT	1239	5	+	Arabidopsis thaliana	common cis-acting element in promoter and enhancer regions
GmFtsH7	CAAT-box	CAAT	1240	4	+	Nicotiana glutinosa
GmFtsH7	CAAT-box	CAAT	1265	4	+	Nicotiana glutinosa
GmFtsH7	CAAT-box	CAAT	1343	4	-	Nicotiana glutinosa
GmFtsH7	CAAT-box	CAAAT	1434	5	+	Pisum sativum	common cis-acting element in promoter and enhancer regions
GmFtsH7	CAAT-box	CAAT	1478	4	-	Nicotiana glutinosa
GmFtsH7	CAAT-box	CAAAT	1604	5	-	Pisum sativum	common cis-acting element in promoter and enhancer regions
GmFtsH7	CAAT-box	CAAT	1617	4	+	Nicotiana glutinosa
GmFtsH7	CAAT-box	CCAAT	1745	5	-	Arabidopsis thaliana	common cis-acting element in promoter and enhancer regions
GmFtsH7	G-box	CCACGTAA	1362	8	+	Brassica napus	cis-acting regulatory element involved in light responsiveness
GmFtsH7	G-box	TACGTG	1363	6	-	Arabidopsis thaliana	cis-acting regulatory element involved in light responsiveness
GmFtsH7	LTR	CCGAAA	207	6	-	Hordeum vulgare	cis-acting element involved in low-temperature responsiveness
GmFtsH7	MYB-like sequence	TAACCA	818	6	+	Arabidopsis thaliana
GmFtsH7	MYB-like sequence	TAACCA	1335	6	+	Arabidopsis thaliana
GmFtsH7	TCT-motif	TCTTAC	399	6	-	Arabidopsis thaliana	part of a light responsive element
GmFtsH7	TCT-motif	TCTTAC	445	6	-	Arabidopsis thaliana	part of a light responsive element
GmFtsH7	STRE	AGGGG	1440	5	-	Arabidopsis thaliana
GmFtsH7	STRE	AGGGG	1611	5	-	Arabidopsis thaliana
GmFtsH7	STRE	AGGGG	1766	5	-	Arabidopsis thaliana
GmFtsH7	STRE	AGGGG	1775	5	-	Arabidopsis thaliana
GmFtsH7	STRE	AGGGG	1909	5	+	Arabidopsis thaliana
GmFtsH7	STRE	AGGGG	1975	5	+	Arabidopsis thaliana
GmFtsH7	STRE	AGGGG	1985	5	+	Arabidopsis thaliana
GmFtsH7	MBS	CAACTG	524	6	-	Arabidopsis thaliana	MYB binding site involved in drought-inducibility
GmFtsH7	MBS	CAACTG	1510	6	+	Arabidopsis thaliana	MYB binding site involved in drought-inducibility
GmFtsH7	MBS	CAACTG	1684	6	-	Arabidopsis thaliana	MYB binding site involved in drought-inducibility
GmFtsH7	MBS	CAACTG	1781	6	+	Arabidopsis thaliana	MYB binding site involved in drought-inducibility
GmFtsH7	Myb	TAACTG	159	6	-	Arabidopsis thaliana
GmFtsH7	Myb	CAACTG	524	6	-	Arabidopsis thaliana
GmFtsH7	Myb	CAACTG	1510	6	+	Arabidopsis thaliana
GmFtsH7	Myb	CAACTG	1684	6	-	Arabidopsis thaliana
GmFtsH7	Myb	CAACTG	1781	6	+	Arabidopsis thaliana
GmFtsH7	GATA-motif	GATAGGG	1883	7	+	Pisum sativum	part of a light responsive element
GmFtsH7	O2-site	GATGATGTGG	1675	9	-	Zea mays	cis-acting regulatory element involved in zein metabolism regulation
GmFtsH7	TCCC-motif	TCTCCCT	1005	7	-	Spinacia oleracea	part of a light responsive element
GmFtsH7	ATC-motif	AGTAATCT	736	8	+	Spinacia oleracea	part of a conserved DNA module involved in light responsiveness
GmFtsH7	MYC	CATGTG	86	6	-	Arabidopsis thaliana
GmFtsH7	MYC	CATGTG	1750	6	+	Arabidopsis thaliana
GmFtsH7	ARE	AAACCA	149	6	+	Zea mays	cis-acting regulatory element essential for the anaerobic induction
GmFtsH7	ARE	AAACCA	1322	6	+	Zea mays	cis-acting regulatory element essential for the anaerobic induction
GmFtsH7	WUN-motif	AAATTTCCT	1084	9	+	Brassica oleracea	wound-responsive element
GmFtsH7	TC-rich repeats	GTTTTCTTAC	445	9	-	Nicotiana tabacum	cis-acting element involved in defense and stress responsiveness
GmFtsH7	P-box	CCTTTTG	1944	7	-	Oryza sativa	gibberellin-responsive element
GmFtsH7	ABRE	ACGTG	1363	5	-	Arabidopsis thaliana	cis-acting element involved in the abscisic acid responsiveness
GmFtsH7	WRE3	CCACCT	1039	6	-	Pisum sativum
GmFtsH7	I-box	TGATAATGT	287	9	+	Solanum tuberosum	part of a light responsive element
GmFtsH8	ERE	ATTTTAAA	1383	8	+	Nicotiana glutinos
GmFtsH8	ERE	ATTTTAAA	1385	8	-	Nicotiana glutinos
GmFtsH8	ERE	ATTTTAAA	1558	8	+	Nicotiana glutinos
GmFtsH8	GTGGC-motif	GATTCTGTGGC	1788	10	-	Spinacia oleracea	part of a light responsive element
GmFtsH8	LTR	CCGAAA	1	6	+	Hordeum vulgare	cis-acting element involved in low-temperature responsiveness
GmFtsH8	LTR	CCGAAA	1942	6	+	Hordeum vulgare	cis-acting element involved in low-temperature responsiveness
GmFtsH8	AT~TATA-box	TATATA	613	6	+	Arabidopsis thaliana
GmFtsH8	AT~TATA-box	TATATA	615	6	+	Arabidopsis thaliana
GmFtsH8	AT~TATA-box	TATATA	900	6	+	Arabidopsis thaliana
GmFtsH8	CGTCA-motif	CGTCA	1781	5	+	Hordeum vulgare	cis-acting regulatory element involved in the MeJA-responsiveness
GmFtsH8	TGACG-motif	TGACG	1781	5	-	Hordeum vulgare	cis-acting regulatory element involved in the MeJA-responsiveness
GmFtsH8	CAT-box	GCCACT	170	6	-	Arabidopsis thaliana	cis-acting regulatory element related to meristem expression
GmFtsH8	CAT-box	GCCACT	199	6	-	Arabidopsis thaliana	cis-acting regulatory element related to meristem expression
GmFtsH8	CAT-box	GCCACT	291	6	-	Arabidopsis thaliana	cis-acting regulatory element related to meristem expression
GmFtsH8	CAT-box	GCCACT	412	6	-	Arabidopsis thaliana	cis-acting regulatory element related to meristem expression
GmFtsH8	G-box	CACGTC	1779	6	+	Zea mays	cis-acting regulatory element involved in light responsiveness
GmFtsH8	G-box	GCCACGTGGA	1831	9	-	Arabidopsis thaliana	cis-acting regulatory element involved in light responsiveness
GmFtsH8	G-box	ACACGTGGC	1832	9	+	Brassica napus	cis-acting regulatory element involved in light responsiveness
GmFtsH8	G-box	CACGTG	1833	6	-	Arabidopsis thaliana	cis-acting regulatory element involved in light responsiveness
GmFtsH8	Box 4	ATTAAT	622	6	+	Petroselinum crispum	part of a conserved DNA module involved in light responsiveness
GmFtsH8	Box 4	ATTAAT	749	6	+	Petroselinum crispum	part of a conserved DNA module involved in light responsiveness
GmFtsH8	Box 4	ATTAAT	807	6	+	Petroselinum crispum	part of a conserved DNA module involved in light responsiveness
GmFtsH8	Box 4	ATTAAT	1274	6	-	Petroselinum crispum	part of a conserved DNA module involved in light responsiveness
GmFtsH8	Box 4	ATTAAT	1436	6	-	Petroselinum crispum	part of a conserved DNA module involved in light responsiveness
GmFtsH8	Box 4	ATTAAT	1658	6	-	Petroselinum crispum	part of a conserved DNA module involved in light responsiveness
GmFtsH8	Box 4	ATTAAT	1689	6	-	Petroselinum crispum	part of a conserved DNA module involved in light responsiveness
GmFtsH8	STRE	AGGGG	1753	5	-	Arabidopsis thaliana
GmFtsH8	STRE	AGGGG	1867	5	-	Arabidopsis thaliana
GmFtsH8	G-Box	CACGTG	1833	6	-	Pisum sativum	cis-acting regulatory element involved in light responsiveness
GmFtsH8	MYC	CATTTG	1616	6	+	Arabidopsis thaliana
GmFtsH8	WUN-motif	AAATTTCCT	1246	9	+	Brassica oleracea	wound-responsive element
GmFtsH8	GATA-motif	AAGATAAGATT	1609	10	+	Arabidopsis thaliana	part of a light responsive element
GmFtsH8	MYB	CAACCA	1905	6	+	Arabidopsis thaliana
GmFtsH8	ARE	AAACCA	232	6	+	Zea mays	cis-acting regulatory element essential for the anaerobic induction
GmFtsH8	ARE	AAACCA	286	6	+	Zea mays	cis-acting regulatory element essential for the anaerobic induction
GmFtsH8	ARE	AAACCA	1857	6	+	Zea mays	cis-acting regulatory element essential for the anaerobic induction
GmFtsH8	ARE	AAACCA	1918	6	+	Zea mays	cis-acting regulatory element essential for the anaerobic induction
GmFtsH8	CAAT-box	CAAT	34	4	+	Nicotiana glutinosa
GmFtsH8	CAAT-box	CCAAT	77	5	+	Arabidopsis thaliana	common cis-acting element in promoter and enhancer regions
GmFtsH8	CAAT-box	CAAT	78	4	+	Nicotiana glutinosa
GmFtsH8	CAAT-box	CAAT	118	4	-	Nicotiana glutinosa
GmFtsH8	CAAT-box	CAAT	246	4	+	Nicotiana glutinosa
GmFtsH8	CAAT-box	CAAT	330	4	-	Nicotiana glutinosa
GmFtsH8	CAAT-box	CCAAT	382	5	-	Arabidopsis thaliana	common cis-acting element in promoter and enhancer regions
GmFtsH8	CAAT-box	CAAT	424	4	+	Nicotiana glutinosa
GmFtsH8	CAAT-box	CAAT	508	4	-	Nicotiana glutinosa
GmFtsH8	CAAT-box	CAAAT	524	5	-	Pisum sativum	common cis-acting element in promoter and enhancer regions
GmFtsH8	CAAT-box	CAAT	538	4	+	Nicotiana glutinosa
GmFtsH8	CAAT-box	CCAAT	562	5	-	Arabidopsis thaliana	common cis-acting element in promoter and enhancer regions
GmFtsH8	CAAT-box	CAAAT	596	5	+	Pisum sativum	common cis-acting element in promoter and enhancer regions
GmFtsH8	CAAT-box	CAAAT	631	5	+	Pisum sativum	common cis-acting element in promoter and enhancer regions
GmFtsH8	CAAT-box	CAAAT	822	5	+	Pisum sativum	common cis-acting element in promoter and enhancer regions
GmFtsH8	CAAT-box	CAAT	870	4	-	Nicotiana glutinosa
GmFtsH8	CAAT-box	CAAAT	911	5	+	Pisum sativum	common cis-acting element in promoter and enhancer regions
GmFtsH8	CAAT-box	CAAT	924	4	+	Nicotiana glutinosa
GmFtsH8	CAAT-box	CAAT	994	4	+	Nicotiana glutinosa
GmFtsH8	CAAT-box	CAAAT	1020	5	-	Pisum sativum	common cis-acting element in promoter and enhancer regions
GmFtsH8	CAAT-box	CCAAT	1045	5	+	Arabidopsis thaliana	common cis-acting element in promoter and enhancer regions
GmFtsH8	CAAT-box	CAAT	1046	4	+	Nicotiana glutinosa
GmFtsH8	CAAT-box	CCAAT	1133	5	-	Arabidopsis thaliana	common cis-acting element in promoter and enhancer regions
GmFtsH8	CAAT-box	CAAT	1167	4	+	Nicotiana glutinosa
GmFtsH8	CAAT-box	CAAT	1294	4	-	Nicotiana glutinosa
GmFtsH8	CAAT-box	CAAAT	1380	5	+	Pisum sativum	common cis-acting element in promoter and enhancer regions
GmFtsH8	CAAT-box	CAAAT	1617	5	-	Pisum sativum	common cis-acting element in promoter and enhancer regions
GmFtsH8	CAAT-box	CAAT	1625	4	+	Nicotiana glutinosa
GmFtsH8	CAAT-box	CAAAT	1731	5	+	Pisum sativum	common cis-acting element in promoter and enhancer regions
GmFtsH8	CAAT-box	CAAT	1738	4	+	Nicotiana glutinosa
GmFtsH8	CAAT-box	CAAAT	1759	5	-	Pisum sativum	common cis-acting element in promoter and enhancer regions
GmFtsH8	CAAT-box	CAAAT	1954	5	+	Pisum sativum	common cis-acting element in promoter and enhancer regions
GmFtsH8	CAAT-box	CAAT	1987	4	+	Nicotiana glutinosa
GmFtsH8	AP-1	TGAGTTAG	932	8	-	Arabidopsis thaliana
GmFtsH8	TATA	TATAAAAT	844	8	+	Arabidopsis thaliana
GmFtsH8	TATA	TATAAAAT	1004	8	+	Arabidopsis thaliana
GmFtsH8	TATA	TATAAAAT	1493	8	-	Arabidopsis thaliana
GmFtsH8	GT1-motif	GGTTAA	585	6	-	Arabidopsis thaliana	light responsive element
GmFtsH8	ABRE	ACGTG	1779	5	-	Arabidopsis thaliana	cis-acting element involved in the abscisic acid responsiveness
GmFtsH8	ABRE	GACACGTGGC	1831	9	+	Triticum aestivum	cis-acting element involved in the abscisic acid responsiveness
GmFtsH8	ABRE	CACGTG	1833	6	-	Arabidopsis thaliana	cis-acting element involved in the abscisic acid responsiveness
GmFtsH8	ABRE	ACGTG	1834	5	+	Arabidopsis thaliana	cis-acting element involved in the abscisic acid responsiveness
GmFtsH8	O2-site	GTTGACGTGA	1778	9	-	Zea mays	cis-acting regulatory element involved in zein metabolism regulation
GmFtsH8	O2-site	GATGATGTGG	1789	9	-	Zea mays	cis-acting regulatory element involved in zein metabolism regulation
GmFtsH8	AT-rich sequence	TAAAATACT	1555	9	-	Pisum sativum	element for maximal elicitor-mediated activation (2copies)
GmFtsH8	TATA-box	TATAA	125	5	-	Arabidopsis thaliana	core promoter element around -30 of transcription start
GmFtsH8	TATA-box	TATA	126	4	+	Arabidopsis thaliana	core promoter element around -30 of transcription start
GmFtsH8	TATA-box	TATA	209	4	+	Arabidopsis thaliana	core promoter element around -30 of transcription start
GmFtsH8	TATA-box	TATAA	337	5	-	Arabidopsis thaliana	core promoter element around -30 of transcription start
GmFtsH8	TATA-box	TATA	338	4	+	Arabidopsis thaliana	core promoter element around -30 of transcription start
GmFtsH8	TATA-box	TATA	363	4	+	Arabidopsis thaliana	core promoter element around -30 of transcription start
GmFtsH8	TATA-box	ATATAA	483	6	+	Brassica oleracea	core promoter element around -30 of transcription start
GmFtsH8	TATA-box	TATA	484	4	+	Arabidopsis thaliana	core promoter element around -30 of transcription start
GmFtsH8	TATA-box	ATTATA	498	6	+	Brassica napus	core promoter element around -30 of transcription start
GmFtsH8	TATA-box	TATAA	499	5	-	Arabidopsis thaliana	core promoter element around -30 of transcription start
GmFtsH8	TATA-box	TATA	500	4	+	Arabidopsis thaliana	core promoter element around -30 of transcription start
GmFtsH8	TATA-box	ATATAA	530	6	+	Brassica oleracea	core promoter element around -30 of transcription start
GmFtsH8	TATA-box	TATA	531	4	+	Arabidopsis thaliana	core promoter element around -30 of transcription start
GmFtsH8	TATA-box	ATTATA	551	6	+	Brassica napus	core promoter element around -30 of transcription start
GmFtsH8	TATA-box	TATAA	552	5	-	Arabidopsis thaliana	core promoter element around -30 of transcription start
GmFtsH8	TATA-box	TATA	553	4	+	Arabidopsis thaliana	core promoter element around -30 of transcription start
GmFtsH8	TATA-box	ATTATA	611	6	+	Brassica napus	core promoter element around -30 of transcription start
GmFtsH8	TATA-box	TATATAA	612	7	-	Arabidopsis thaliana	core promoter element around -30 of transcription start
GmFtsH8	TATA-box	TATATA	613	6	+	Arabidopsis thaliana	core promoter element around -30 of transcription start
GmFtsH8	TATA-box	ATATAT	614	6	+	Brassica napus	core promoter element around -30 of transcription start
GmFtsH8	TATA-box	TATATA	615	6	+	Arabidopsis thaliana	core promoter element around -30 of transcription start
GmFtsH8	TATA-box	ATATAA	616	6	+	Brassica oleracea	core promoter element around -30 of transcription start
GmFtsH8	TATA-box	TATA	617	4	+	Arabidopsis thaliana	core promoter element around -30 of transcription start
GmFtsH8	TATA-box	ATATAA	634	6	+	Brassica oleracea	core promoter element around -30 of transcription start
GmFtsH8	TATA-box	TATA	635	4	+	Arabidopsis thaliana	core promoter element around -30 of transcription start
GmFtsH8	TATA-box	ATATAA	660	6	+	Brassica oleracea	core promoter element around -30 of transcription start
GmFtsH8	TATA-box	TATA	661	4	+	Arabidopsis thaliana	core promoter element around -30 of transcription start
GmFtsH8	TATA-box	TATAAAA	743	7	-	Pisum sativum	core promoter element around -30 of transcription start
GmFtsH8	TATA-box	TATAAA	744	6	-	Helianthus annuus	core promoter element around -30 of transcription start
GmFtsH8	TATA-box	TATAA	745	5	-	Arabidopsis thaliana	core promoter element around -30 of transcription start
GmFtsH8	TATA-box	TATA	746	4	+	Arabidopsis thaliana	core promoter element around -30 of transcription start
GmFtsH8	TATA-box	ATATAA	753	6	+	Brassica oleracea	core promoter element around -30 of transcription start
GmFtsH8	TATA-box	TATA	754	4	+	Arabidopsis thaliana	core promoter element around -30 of transcription start
GmFtsH8	TATA-box	TATAA	843	5	-	Arabidopsis thaliana	core promoter element around -30 of transcription start
GmFtsH8	TATA-box	TATA	844	4	+	Arabidopsis thaliana	core promoter element around -30 of transcription start
GmFtsH8	TATA-box	TACAAAA	893	7	+	Oryza sativa	core promoter element around -30 of transcription start
GmFtsH8	TATA-box	ATATAT	899	6	+	Brassica napus	core promoter element around -30 of transcription start
GmFtsH8	TATA-box	TATATA	900	6	+	Arabidopsis thaliana	core promoter element around -30 of transcription start
GmFtsH8	TATA-box	ATATAT	901	6	+	Brassica napus	core promoter element around -30 of transcription start
GmFtsH8	TATA-box	TATA	902	4	+	Arabidopsis thaliana	core promoter element around -30 of transcription start
GmFtsH8	TATA-box	TATA	957	4	+	Arabidopsis thaliana	core promoter element around -30 of transcription start
GmFtsH8	TATA-box	ccTATAAAaa	967	9	+	Arabidopsis thaliana	core promoter element around -30 of transcription start
GmFtsH8	TATA-box	TATA	969	4	+	Arabidopsis thaliana	core promoter element around -30 of transcription start
GmFtsH8	TATA-box	ccTATAAAaa	1002	9	+	Arabidopsis thaliana	core promoter element around -30 of transcription start
GmFtsH8	TATA-box	TATA	1004	4	-	Arabidopsis thaliana	core promoter element around -30 of transcription start
GmFtsH8	TATA-box	TATA	1051	4	-	Arabidopsis thaliana	core promoter element around -30 of transcription start
GmFtsH8	TATA-box	TATACA	1081	6	-	Helianthus annuus	core promoter element around -30 of transcription start
GmFtsH8	TATA-box	TATA	1083	4	-	Arabidopsis thaliana	core promoter element around -30 of transcription start
GmFtsH8	TATA-box	ATATAT	1129	6	-	Brassica napus	core promoter element around -30 of transcription start
GmFtsH8	TATA-box	TATA	1130	4	-	Arabidopsis thaliana	core promoter element around -30 of transcription start
GmFtsH8	TATA-box	TATAA	1162	5	-	Arabidopsis thaliana	core promoter element around -30 of transcription start
GmFtsH8	TATA-box	TATA	1163	4	-	Arabidopsis thaliana	core promoter element around -30 of transcription start
GmFtsH8	TATA-box	ATTATA	1349	6	+	Brassica napus	core promoter element around -30 of transcription start
GmFtsH8	TATA-box	TATAA	1350	5	-	Arabidopsis thaliana	core promoter element around -30 of transcription start
GmFtsH8	TATA-box	TATA	1351	4	-	Arabidopsis thaliana	core promoter element around -30 of transcription start
GmFtsH8	TATA-box	TATA	1368	4	-	Arabidopsis thaliana	core promoter element around -30 of transcription start
GmFtsH8	TATA-box	TACAAAA	1452	7	+	Oryza sativa	core promoter element around -30 of transcription start
GmFtsH8	TATA-box	ATATAA	1485	6	+	Brassica oleracea	core promoter element around -30 of transcription start
GmFtsH8	TATA-box	TATA	1486	4	-	Arabidopsis thaliana	core promoter element around -30 of transcription start
GmFtsH8	TATA-box	TATAAAA	1494	7	-	Pisum sativum	core promoter element around -30 of transcription start
GmFtsH8	TATA-box	TATAAA	1495	6	-	Helianthus annuus	core promoter element around -30 of transcription start
GmFtsH8	TATA-box	TATAA	1496	5	-	Arabidopsis thaliana	core promoter element around -30 of transcription start
GmFtsH8	TATA-box	TATA	1497	4	-	Arabidopsis thaliana	core promoter element around -30 of transcription start
GmFtsH8	TATA-box	ccTATAAAaa	1536	9	+	Arabidopsis thaliana	core promoter element around -30 of transcription start
GmFtsH8	TATA-box	TATA	1538	4	-	Arabidopsis thaliana	core promoter element around -30 of transcription start
GmFtsH8	TATA-box	ATTATA	1662	6	+	Brassica napus	core promoter element around -30 of transcription start
GmFtsH8	TATA-box	TATAA	1663	5	-	Arabidopsis thaliana	core promoter element around -30 of transcription start
GmFtsH8	TATA-box	TATA	1664	4	-	Arabidopsis thaliana	core promoter element around -30 of transcription start
GmFtsH8	TATA-box	ATATAT	1681	6	-	Brassica napus	core promoter element around -30 of transcription start
GmFtsH8	TATA-box	TATA	1682	4	-	Arabidopsis thaliana	core promoter element around -30 of transcription start
GmFtsH9	AT~TATA-box	TATATAAA	1336	8	-	Arabidopsis thaliana
GmFtsH9	AT~TATA-box	TATATA	1338	6	-	Arabidopsis thaliana
GmFtsH9	AT~TATA-box	TATATA	1823	6	-	Arabidopsis thaliana
GmFtsH9	circadian	CAAAGATATC	1357	9	-	Lycopersicon esculentum	cis-acting regulatory element involved in circadian control
GmFtsH9	I-box	AGATAAGG	649	8	+	Triticum aestivum	part of a light responsive element
GmFtsH9	GT1-motif	GGTTAA	682	6	-	Arabidopsis thaliana	light responsive element
GmFtsH9	TCT-motif	TCTTAC	229	6	-	Arabidopsis thaliana	part of a light responsive element
GmFtsH9	MRE	AACCTAA	115	7	+	Petroselinum crispum	MYB binding site involved in light responsiveness
GmFtsH9	LTR	CCGAAA	1769	6	-	Hordeum vulgare	cis-acting element involved in low-temperature responsiveness
GmFtsH9	CAAT-box	CAAT	123	4	+	Nicotiana glutinosa
GmFtsH9	CAAT-box	CAAT	127	4	+	Nicotiana glutinosa
GmFtsH9	CAAT-box	CAAT	141	4	-	Nicotiana glutinosa
GmFtsH9	CAAT-box	CAAT	197	4	-	Nicotiana glutinosa
GmFtsH9	CAAT-box	CAAT	243	4	+	Nicotiana glutinosa
GmFtsH9	CAAT-box	CAAT	266	4	+	Nicotiana glutinosa
GmFtsH9	CAAT-box	CCAAT	321	5	+	Arabidopsis thaliana	common cis-acting element in promoter and enhancer regions
GmFtsH9	CAAT-box	CAAT	322	4	+	Nicotiana glutinosa
GmFtsH9	CAAT-box	CAAAT	343	5	+	Pisum sativum	common cis-acting element in promoter and enhancer regions
GmFtsH9	CAAT-box	CAAT	361	4	-	Nicotiana glutinosa
GmFtsH9	CAAT-box	CAAAT	368	5	+	Pisum sativum	common cis-acting element in promoter and enhancer regions
GmFtsH9	CAAT-box	CAAAT	380	5	+	Pisum sativum	common cis-acting element in promoter and enhancer regions
GmFtsH9	CAAT-box	CCAAT	490	5	+	Arabidopsis thaliana	common cis-acting element in promoter and enhancer regions
GmFtsH9	CAAT-box	CAAT	491	4	+	Nicotiana glutinosa
GmFtsH9	CAAT-box	CAAT	500	4	-	Nicotiana glutinosa
GmFtsH9	CAAT-box	CAAT	507	4	+	Nicotiana glutinosa
GmFtsH9	CAAT-box	CAAAT	526	5	-	Pisum sativum	common cis-acting element in promoter and enhancer regions
GmFtsH9	CAAT-box	CCAAT	600	5	+	Arabidopsis thaliana	common cis-acting element in promoter and enhancer regions
GmFtsH9	CAAT-box	CAAT	601	4	+	Nicotiana glutinosa
GmFtsH9	CAAT-box	CCAAT	620	5	-	Arabidopsis thaliana	common cis-acting element in promoter and enhancer regions
GmFtsH9	CAAT-box	CCAAT	674	5	-	Arabidopsis thaliana	common cis-acting element in promoter and enhancer regions
GmFtsH9	CAAT-box	CAAT	738	4	+	Nicotiana glutinosa
GmFtsH9	CAAT-box	CAAT	762	4	+	Nicotiana glutinosa
GmFtsH9	CAAT-box	CAAAT	772	5	+	Pisum sativum	common cis-acting element in promoter and enhancer regions
GmFtsH9	CAAT-box	CAAT	835	4	-	Nicotiana glutinosa
GmFtsH9	CAAT-box	CCAAT	839	5	+	Arabidopsis thaliana	common cis-acting element in promoter and enhancer regions
GmFtsH9	CAAT-box	CAAT	840	4	+	Nicotiana glutinosa
GmFtsH9	CAAT-box	CAAT	849	4	-	Nicotiana glutinosa
GmFtsH9	CAAT-box	CAAT	956	4	-	Nicotiana glutinosa
GmFtsH9	CAAT-box	CAAAT	1014	5	-	Pisum sativum	common cis-acting element in promoter and enhancer regions
GmFtsH9	CAAT-box	CAAT	1101	4	+	Nicotiana glutinosa
GmFtsH9	CAAT-box	CAAAT	1112	5	+	Pisum sativum	common cis-acting element in promoter and enhancer regions
GmFtsH9	CAAT-box	CAAT	1122	4	+	Nicotiana glutinosa
GmFtsH9	CAAT-box	CAAT	1167	4	+	Nicotiana glutinosa
GmFtsH9	CAAT-box	CCAAT	1223	5	+	Arabidopsis thaliana	common cis-acting element in promoter and enhancer regions
GmFtsH9	CAAT-box	CAAT	1224	4	+	Nicotiana glutinosa
GmFtsH9	CAAT-box	CAAAT	1303	5	-	Pisum sativum	common cis-acting element in promoter and enhancer regions
GmFtsH9	CAAT-box	CAAT	1370	4	-	Nicotiana glutinosa
GmFtsH9	CAAT-box	CAAAT	1374	5	-	Pisum sativum	common cis-acting element in promoter and enhancer regions
GmFtsH9	CAAT-box	CAAT	1528	4	+	Nicotiana glutinosa
GmFtsH9	CAAT-box	CAAT	1620	4	-	Nicotiana glutinosa
GmFtsH9	CAAT-box	CAAT	1627	4	+	Nicotiana glutinosa
GmFtsH9	CAAT-box	CAAT	1655	4	+	Nicotiana glutinosa
GmFtsH9	CAAT-box	CAAT	1693	4	+	Nicotiana glutinosa
GmFtsH9	CAAT-box	CAAT	1700	4	+	Nicotiana glutinosa
GmFtsH9	CAAT-box	CAAAT	1708	5	+	Pisum sativum	common cis-acting element in promoter and enhancer regions
GmFtsH9	CAAT-box	CAAT	1711	4	-	Nicotiana glutinosa
GmFtsH9	CAAT-box	CCAAT	1874	5	-	Arabidopsis thaliana	common cis-acting element in promoter and enhancer regions
GmFtsH9	CAAT-box	CAAAT	1893	5	-	Pisum sativum	common cis-acting element in promoter and enhancer regions
GmFtsH9	TATA-box	TACAAAA	82	7	+	Oryza sativa	core promoter element around -30 of transcription start
GmFtsH9	TATA-box	ccTATAAAaa	387	9	+	Arabidopsis thaliana	core promoter element around -30 of transcription start
GmFtsH9	TATA-box	TACAAAA	876	7	+	Oryza sativa	core promoter element around -30 of transcription start
GmFtsH9	TATA-box	TACATAAA	1293	8	+	Oryza sativa	core promoter element around -30 of transcription start
GmFtsH9	TATA-box	TATAAAA	1335	7	-	Pisum sativum	core promoter element around -30 of transcription start
GmFtsH9	TATA-box	TATAAA	1336	6	-	Helianthus annuus	core promoter element around -30 of transcription start
GmFtsH9	TATA-box	TATATAA	1337	7	-	Arabidopsis thaliana	core promoter element around -30 of transcription start
GmFtsH9	TATA-box	TATATA	1338	6	-	Arabidopsis thaliana	core promoter element around -30 of transcription start
GmFtsH9	TATA-box	ATATAA	1339	6	+	Brassica oleracea	core promoter element around -30 of transcription start
GmFtsH9	TATA-box	TATA	1340	4	-	Arabidopsis thaliana	core promoter element around -30 of transcription start
GmFtsH9	TATA-box	TACAAAA	1362	7	-	Oryza sativa	core promoter element around -30 of transcription start
GmFtsH9	TATA-box	ATATAT	1500	6	-	Brassica napus	core promoter element around -30 of transcription start
GmFtsH9	TATA-box	TATA	1501	4	-	Arabidopsis thaliana	core promoter element around -30 of transcription start
GmFtsH9	TATA-box	ATTATA	1609	6	+	Brassica napus	core promoter element around -30 of transcription start
GmFtsH9	TATA-box	TATAA	1610	5	-	Arabidopsis thaliana	core promoter element around -30 of transcription start
GmFtsH9	TATA-box	TATA	1611	4	-	Arabidopsis thaliana	core promoter element around -30 of transcription start
GmFtsH9	TATA-box	TATAAATA	1719	8	-	Daucus carota	core promoter element around -30 of transcription start
GmFtsH9	TATA-box	TATAAAT	1720	7	-	Brassica juncea	core promoter element around -30 of transcription start
GmFtsH9	TATA-box	TATAAA	1721	6	-	Helianthus annuus	core promoter element around -30 of transcription start
GmFtsH9	TATA-box	TATAA	1722	5	-	Arabidopsis thaliana	core promoter element around -30 of transcription start
GmFtsH9	TATA-box	TATA	1723	4	-	Arabidopsis thaliana	core promoter element around -30 of transcription start
GmFtsH9	TATA-box	TATAA	1762	5	-	Arabidopsis thaliana	core promoter element around -30 of transcription start
GmFtsH9	TATA-box	TATA	1763	4	-	Arabidopsis thaliana	core promoter element around -30 of transcription start
GmFtsH9	TATA-box	TACAAAA	1776	7	+	Oryza sativa	core promoter element around -30 of transcription start
GmFtsH9	TATA-box	TATATA	1823	6	-	Arabidopsis thaliana	core promoter element around -30 of transcription start
GmFtsH9	TATA-box	TATA	1825	4	-	Arabidopsis thaliana	core promoter element around -30 of transcription start
GmFtsH9	TATA-box	ATATAT	1851	6	-	Brassica napus	core promoter element around -30 of transcription start
GmFtsH9	TATA-box	TATA	1852	4	-	Arabidopsis thaliana	core promoter element around -30 of transcription start
GmFtsH9	TATA-box	TATTTAAA	1854	8	+	Arabidopsis thaliana	core promoter element around -30 of transcription start
GmFtsH9	TATA-box	ATATAA	1974	6	+	Brassica oleracea	core promoter element around -30 of transcription start
GmFtsH9	TATA-box	TATA	1975	4	-	Arabidopsis thaliana	core promoter element around -30 of transcription start
GmFtsH9	MYB	CAACCA	16	6	-	Arabidopsis thaliana
GmFtsH9	MYB	TAACCA	591	6	+	Arabidopsis thaliana
GmFtsH9	AE-box	AGAAACTT	1413	8	+	Arabidopsis thaliana	part of a module for light response
GmFtsH9	AE-box	AGAAACTT	1422	8	-	Arabidopsis thaliana	part of a module for light response
GmFtsH9	STRE	AGGGG	1190	5	-	Arabidopsis thaliana
GmFtsH9	STRE	AGGGG	1408	5	+	Arabidopsis thaliana
GmFtsH9	STRE	AGGGG	1789	5	-	Arabidopsis thaliana
GmFtsH9	STRE	AGGGG	1802	5	-	Arabidopsis thaliana
GmFtsH9	G-box	CACGTC	30	6	-	Zea mays	cis-acting regulatory element involved in light responsiveness
GmFtsH9	G-box	TAACACGTAG	1921	9	-	Brassica oleracea	cis-acting regulatory element involved in light responsiveness
GmFtsH9	WUN-motif	AAATTTCTT	1052	9	-	Nicotiana glutinosa
GmFtsH9	WUN-motif	AAATTTCTT	1312	9	+	Nicotiana glutinosa
GmFtsH9	ABRE	ACGTG	31	5	+	Arabidopsis thaliana	cis-acting element involved in the abscisic acid responsiveness
GmFtsH9	WRE3	CCACCT	985	6	-	Pisum sativum
GmFtsH9	WRE3	CCACCT	1078	6	-	Pisum sativum
GmFtsH9	MYB-like sequence	TAACCA	591	6	+	Arabidopsis thaliana
GmFtsH9	MYC	CATTTG	1112	6	-	Arabidopsis thaliana
GmFtsH9	ERE	ATTTTAAA	744	8	+	Nicotiana glutinos
GmFtsH9	ERE	ATTTTAAA	1103	8	+	Nicotiana glutinos
GmFtsH9	ERE	ATTTTAAA	1473	8	+	Nicotiana glutinos
GmFtsH9	ERE	ATTTTAAA	1836	8	-	Nicotiana glutinos
GmFtsH9	ERE	ATTTTAAA	1856	8	-	Nicotiana glutinos
GmFtsH9	Box 4	ATTAAT	740	6	+	Petroselinum crispum	part of a conserved DNA module involved in light responsiveness
GmFtsH9	Box 4	ATTAAT	1927	6	-	Petroselinum crispum	part of a conserved DNA module involved in light responsiveness
GmFtsH9	Myc	TCTCTTA	943	7	+	Arabidopsis thaliana
GmFtsH9	W box	TTGACC	1697	6	-	Arabidopsis thaliana
GmFtsH9	GATA-motif	AAGATAAGATT	1123	10	-	Arabidopsis thaliana	part of a light responsive element
GmFtsH10	WRE3	CCACCT	494	6	-	Pisum sativum
GmFtsH10	WRE3	CCACCT	522	6	-	Pisum sativum
GmFtsH10	WRE3	CCACCT	1711	6	-	Pisum sativum
GmFtsH10	TGACG-motif	TGACG	1567	5	+	Hordeum vulgare	cis-acting regulatory element involved in the MeJA-responsiveness
GmFtsH10	O2-site	GATGACATGG	151	9	+	Zea mays	cis-acting regulatory element involved in zein metabolism regulation
GmFtsH10	CAAT-box	CAAT	32	4	+	Nicotiana glutinosa
GmFtsH10	CAAT-box	CAAT	45	4	+	Nicotiana glutinosa
GmFtsH10	CAAT-box	CAAT	51	4	+	Nicotiana glutinosa
GmFtsH10	CAAT-box	CAAAT	74	5	+	Pisum sativum	common cis-acting element in promoter and enhancer regions
GmFtsH10	CAAT-box	CCAAT	141	5	+	Arabidopsis thaliana	common cis-acting element in promoter and enhancer regions
GmFtsH10	CAAT-box	CAAT	142	4	+	Nicotiana glutinosa
GmFtsH10	CAAT-box	CAAT	271	4	-	Nicotiana glutinosa
GmFtsH10	CAAT-box	CCAAT	346	5	-	Arabidopsis thaliana	common cis-acting element in promoter and enhancer regions
GmFtsH10	CAAT-box	CAAAT	401	5	-	Pisum sativum	common cis-acting element in promoter and enhancer regions
GmFtsH10	CAAT-box	CAAT	409	4	-	Nicotiana glutinosa
GmFtsH10	CAAT-box	CAAAT	569	5	-	Pisum sativum	common cis-acting element in promoter and enhancer regions
GmFtsH10	CAAT-box	CAAT	600	4	-	Nicotiana glutinosa
GmFtsH10	CAAT-box	CCAAT	668	5	-	Arabidopsis thaliana	common cis-acting element in promoter and enhancer regions
GmFtsH10	CAAT-box	CAAAT	764	5	-	Pisum sativum	common cis-acting element in promoter and enhancer regions
GmFtsH10	CAAT-box	TGCCAAC	786	7	-	Petunia hybrida	common cis-acting element in promoter and enhancer regions
GmFtsH10	CAAT-box	CAAAT	839	5	+	Pisum sativum	common cis-acting element in promoter and enhancer regions
GmFtsH10	CAAT-box	CAAT	872	4	+	Nicotiana glutinosa
GmFtsH10	CAAT-box	CAAT	910	4	+	Nicotiana glutinosa
GmFtsH10	CAAT-box	CAAAT	989	5	-	Pisum sativum	common cis-acting element in promoter and enhancer regions
GmFtsH10	CAAT-box	CAAAT	1046	5	+	Pisum sativum	common cis-acting element in promoter and enhancer regions
GmFtsH10	CAAT-box	CAAAT	1081	5	-	Pisum sativum	common cis-acting element in promoter and enhancer regions
GmFtsH10	CAAT-box	CCAAT	1114	5	+	Arabidopsis thaliana	common cis-acting element in promoter and enhancer regions
GmFtsH10	CAAT-box	CAAT	1115	4	+	Nicotiana glutinosa
GmFtsH10	CAAT-box	CCAAT	1133	5	+	Arabidopsis thaliana	common cis-acting element in promoter and enhancer regions
GmFtsH10	CAAT-box	CAAT	1134	4	+	Nicotiana glutinosa
GmFtsH10	CAAT-box	CCAAT	1163	5	+	Arabidopsis thaliana	common cis-acting element in promoter and enhancer regions
GmFtsH10	CAAT-box	CAAT	1164	4	+	Nicotiana glutinosa
GmFtsH10	CAAT-box	CCAAT	1306	5	-	Arabidopsis thaliana	common cis-acting element in promoter and enhancer regions
GmFtsH10	CAAT-box	CAAT	1551	4	+	Nicotiana glutinosa
GmFtsH10	CAAT-box	CAAT	1558	4	+	Nicotiana glutinosa
GmFtsH10	CAAT-box	CAAT	1565	4	-	Nicotiana glutinosa
GmFtsH10	CAAT-box	CAAAT	1587	5	-	Pisum sativum	common cis-acting element in promoter and enhancer regions
GmFtsH10	CAAT-box	CAAT	1605	4	-	Nicotiana glutinosa
GmFtsH10	CAAT-box	CAAAT	1642	5	+	Pisum sativum	common cis-acting element in promoter and enhancer regions
GmFtsH10	CAAT-box	CAAAT	1703	5	-	Pisum sativum	common cis-acting element in promoter and enhancer regions
GmFtsH10	CAAT-box	CAAAT	1721	5	-	Pisum sativum	common cis-acting element in promoter and enhancer regions
GmFtsH10	CAAT-box	CCAAT	1768	5	+	Arabidopsis thaliana	common cis-acting element in promoter and enhancer regions
GmFtsH10	CAAT-box	CAAT	1769	4	+	Nicotiana glutinosa
GmFtsH10	CAAT-box	CAAT	1773	4	+	Nicotiana glutinosa
GmFtsH10	CAAT-box	CAAT	1879	4	+	Nicotiana glutinosa
GmFtsH10	CAAT-box	CAAT	1894	4	+	Nicotiana glutinosa
GmFtsH10	Myb	TAACTG	624	6	+	Arabidopsis thaliana
GmFtsH10	WUN-motif	AAATTACTA	1901	9	-	Nicotiana glutinosa
GmFtsH10	WUN-motif	AAATTACT	1902	8	-	Nicotiana glutinosa
GmFtsH10	TATA-box	TATA	66	4	+	Arabidopsis thaliana	core promoter element around -30 of transcription start
GmFtsH10	TATA-box	TATAAA	253	6	-	Helianthus annuus	core promoter element around -30 of transcription start
GmFtsH10	TATA-box	TATAA	254	5	-	Arabidopsis thaliana	core promoter element around -30 of transcription start
GmFtsH10	TATA-box	TATA	255	4	+	Arabidopsis thaliana	core promoter element around -30 of transcription start
GmFtsH10	TATA-box	ccTATAAAaa	663	9	-	Arabidopsis thaliana	core promoter element around -30 of transcription start
GmFtsH10	TATA-box	TACAAAA	719	7	-	Oryza sativa	core promoter element around -30 of transcription start
GmFtsH10	TATA-box	TATACA	767	6	-	Helianthus annuus	core promoter element around -30 of transcription start
GmFtsH10	TATA-box	TATA	769	4	+	Arabidopsis thaliana	core promoter element around -30 of transcription start
GmFtsH10	TATA-box	ccTATAAAaa	888	9	-	Arabidopsis thaliana	core promoter element around -30 of transcription start
GmFtsH10	TATA-box	TATAAAA	889	7	-	Pisum sativum	core promoter element around -30 of transcription start
GmFtsH10	TATA-box	TATAAA	890	6	-	Helianthus annuus	core promoter element around -30 of transcription start
GmFtsH10	TATA-box	TATAA	891	5	-	Arabidopsis thaliana	core promoter element around -30 of transcription start
GmFtsH10	TATA-box	TATA	892	4	+	Arabidopsis thaliana	core promoter element around -30 of transcription start
GmFtsH10	TATA-box	TATAAAA	943	7	-	Pisum sativum	core promoter element around -30 of transcription start
GmFtsH10	TATA-box	TATAAA	944	6	-	Helianthus annuus	core promoter element around -30 of transcription start
GmFtsH10	TATA-box	TATAA	945	5	-	Arabidopsis thaliana	core promoter element around -30 of transcription start
GmFtsH10	TATA-box	TATA	946	4	+	Arabidopsis thaliana	core promoter element around -30 of transcription start
GmFtsH10	TATA-box	TATA	1172	4	-	Arabidopsis thaliana	core promoter element around -30 of transcription start
GmFtsH10	TATA-box	ATATAT	1226	6	-	Brassica napus	core promoter element around -30 of transcription start
GmFtsH10	TATA-box	TATA	1227	4	-	Arabidopsis thaliana	core promoter element around -30 of transcription start
GmFtsH10	TATA-box	TATA	1267	4	-	Arabidopsis thaliana	core promoter element around -30 of transcription start
GmFtsH10	TATA-box	ccTATAAAaa	1345	9	-	Arabidopsis thaliana	core promoter element around -30 of transcription start
GmFtsH10	TATA-box	TATAAAA	1346	7	-	Pisum sativum	core promoter element around -30 of transcription start
GmFtsH10	TATA-box	TATAAA	1347	6	-	Helianthus annuus	core promoter element around -30 of transcription start
GmFtsH10	TATA-box	TATAA	1348	5	-	Arabidopsis thaliana	core promoter element around -30 of transcription start
GmFtsH10	TATA-box	TATA	1349	4	-	Arabidopsis thaliana	core promoter element around -30 of transcription start
GmFtsH10	TATA-box	TATTTAAA	1421	8	+	Arabidopsis thaliana	core promoter element around -30 of transcription start
GmFtsH10	TATA-box	TATAAA	1534	6	-	Helianthus annuus	core promoter element around -30 of transcription start
GmFtsH10	TATA-box	TATAA	1535	5	-	Arabidopsis thaliana	core promoter element around -30 of transcription start
GmFtsH10	TATA-box	TATA	1536	4	-	Arabidopsis thaliana	core promoter element around -30 of transcription start
GmFtsH10	TATA-box	ATATAA	1698	6	+	Brassica oleracea	core promoter element around -30 of transcription start
GmFtsH10	TATA-box	TATA	1699	4	-	Arabidopsis thaliana	core promoter element around -30 of transcription start
GmFtsH10	TATA-box	TATA	1837	4	-	Arabidopsis thaliana	core promoter element around -30 of transcription start
GmFtsH10	TATA-box	TAAAGATT	1895	8	-	Arabidopsis thaliana	core promoter element around -30 of transcription start
GmFtsH10	MYC	CATTTG	1720	6	+	Arabidopsis thaliana
GmFtsH10	STRE	AGGGG	181	5	-	Arabidopsis thaliana
GmFtsH10	STRE	AGGGG	391	5	+	Arabidopsis thaliana
GmFtsH10	G-box	CACGAC	221	6	-	Zea mays	cis-acting regulatory element involved in light responsiveness
GmFtsH10	MYB-like sequence	TAACCA	404	6	-	Arabidopsis thaliana
GmFtsH10	MYB-like sequence	TAACCA	620	6	-	Arabidopsis thaliana
GmFtsH10	CGTCA-motif	CGTCA	1567	5	-	Hordeum vulgare	cis-acting regulatory element involved in the MeJA-responsiveness
GmFtsH10	circadian	CAAAGATATC	1541	9	-	Lycopersicon esculentum	cis-acting regulatory element involved in circadian control
GmFtsH10	MYB	CAACCA	206	6	-	Arabidopsis thaliana
GmFtsH10	MYB	TAACCA	404	6	-	Arabidopsis thaliana
GmFtsH10	MYB	TAACCA	620	6	-	Arabidopsis thaliana
GmFtsH10	MYB	CAACCA	634	6	-	Arabidopsis thaliana
GmFtsH10	MYB	CAACAG	726	6	-	Arabidopsis thaliana
GmFtsH10	MYB	CAACCA	1809	6	-	Arabidopsis thaliana
GmFtsH10	MYB	CAACCA	1915	6	+	Arabidopsis thaliana
GmFtsH10	Myb-binding site	CAACAG	726	6	-	Nicotiana tabacum
GmFtsH10	P-box	CCTTTTG	1097	7	-	Oryza sativa	gibberellin-responsive element
GmFtsH10	P-box	CCTTTTG	1498	7	+	Oryza sativa	gibberellin-responsive element
GmFtsH10	MBSI	aaaAaaC(G/C)GTTA	1174	10.5	-	Petunia hybrida	MYB binding site involved in flavonoid biosynthetic genes regulation
GmFtsH10	W box	TTGACC	1927	6	-	Arabidopsis thaliana
GmFtsH10	AuxRR-core	GGTCCAT	527	7	+	Nicotiana tabacum	cis-acting regulatory element involved in auxin responsiveness
GmFtsH10	GT1-motif	GGTTAA	621	6	+	Arabidopsis thaliana	light responsive element
GmFtsH10	ARE	AAACCA	978	6	-	Zea mays	cis-acting regulatory element essential for the anaerobic induction
GmFtsH10	ARE	AAACCA	1575	6	-	Zea mays	cis-acting regulatory element essential for the anaerobic induction
GmFtsH10	TCA-element	CCATCTTTTT	1098	9	-	Nicotiana tabacum	cis-acting element involved in salicylic acid responsiveness
GmFtsH11	ARE	AAACCA	1823	6	+	Zea mays	cis-acting regulatory element essential for the anaerobic induction
GmFtsH11	MYC	CATTTG	382	6	+	Arabidopsis thaliana
GmFtsH11	MYC	CATTTG	657	6	+	Arabidopsis thaliana
GmFtsH11	MYC	CATTTG	948	6	+	Arabidopsis thaliana
GmFtsH11	MYC	CATTTG	1576	6	+	Arabidopsis thaliana
GmFtsH11	MYC	CATGTG	1804	6	+	Arabidopsis thaliana
GmFtsH11	MSA-like	(T/C)C(T/C)AACGG(T/C)(T/C)A	1956	9	+	Catharanthus roseus	cis-acting element involved in cell cycle regulation
GmFtsH11	ABRE	CACGTG	797	6	+	Arabidopsis thaliana	cis-acting element involved in the abscisic acid responsiveness
GmFtsH11	ABRE	ACGTG	798	5	+	Arabidopsis thaliana	cis-acting element involved in the abscisic acid responsiveness
GmFtsH11	ABRE	CACGTG	1425	6	-	Arabidopsis thaliana	cis-acting element involved in the abscisic acid responsiveness
GmFtsH11	ABRE	ACGTG	1426	5	+	Arabidopsis thaliana	cis-acting element involved in the abscisic acid responsiveness
GmFtsH11	circadian	CAAAGATATC	318	9	-	Lycopersicon esculentum	cis-acting regulatory element involved in circadian control
GmFtsH11	circadian	CAAAGATATC	600	9	-	Lycopersicon esculentum	cis-acting regulatory element involved in circadian control
GmFtsH11	circadian	CAAAGATATC	1228	9	-	Lycopersicon esculentum	cis-acting regulatory element involved in circadian control
GmFtsH11	TCT-motif	TCTTAC	1238	6	+	Arabidopsis thaliana	part of a light responsive element
GmFtsH11	GT1-motif	GGTTAA	1711	6	-	Arabidopsis thaliana	light responsive element
GmFtsH11	MYB	CAACCA	101	6	+	Arabidopsis thaliana
GmFtsH11	AT~TATA-box	TATATA	471	6	+	Arabidopsis thaliana
GmFtsH11	AT~TATA-box	TATATA	1099	6	-	Arabidopsis thaliana
GmFtsH11	AT~TATA-box	TATATA	1758	6	-	Arabidopsis thaliana
GmFtsH11	TATA-box	TATA	80	4	+	Arabidopsis thaliana	core promoter element around -30 of transcription start
GmFtsH11	TATA-box	TATAA	208	5	-	Arabidopsis thaliana	core promoter element around -30 of transcription start
GmFtsH11	TATA-box	TATA	209	4	+	Arabidopsis thaliana	core promoter element around -30 of transcription start
GmFtsH11	TATA-box	TATA	232	4	+	Arabidopsis thaliana	core promoter element around -30 of transcription start
GmFtsH11	TATA-box	ATATAT	248	6	+	Brassica napus	core promoter element around -30 of transcription start
GmFtsH11	TATA-box	TATA	249	4	+	Arabidopsis thaliana	core promoter element around -30 of transcription start
GmFtsH11	TATA-box	TATAA	255	5	-	Arabidopsis thaliana	core promoter element around -30 of transcription start
GmFtsH11	TATA-box	TATA	256	4	+	Arabidopsis thaliana	core promoter element around -30 of transcription start
GmFtsH11	TATA-box	ATATAT	319	6	+	Brassica napus	core promoter element around -30 of transcription start
GmFtsH11	TATA-box	TATA	320	4	+	Arabidopsis thaliana	core promoter element around -30 of transcription start
GmFtsH11	TATA-box	TACAAAA	357	7	-	Oryza sativa	core promoter element around -30 of transcription start
GmFtsH11	TATA-box	ATTATA	469	6	+	Brassica napus	core promoter element around -30 of transcription start
GmFtsH11	TATA-box	TATATAA	470	7	-	Arabidopsis thaliana	core promoter element around -30 of transcription start
GmFtsH11	TATA-box	TATATA	471	6	+	Arabidopsis thaliana	core promoter element around -30 of transcription start
GmFtsH11	TATA-box	ATATAA	472	6	+	Brassica oleracea	core promoter element around -30 of transcription start
GmFtsH11	TATA-box	TATA	473	4	+	Arabidopsis thaliana	core promoter element around -30 of transcription start
GmFtsH11	TATA-box	ATATAT	601	6	+	Brassica napus	core promoter element around -30 of transcription start
GmFtsH11	TATA-box	TATA	602	4	+	Arabidopsis thaliana	core promoter element around -30 of transcription start
GmFtsH11	TATA-box	TATA	752	4	+	Arabidopsis thaliana	core promoter element around -30 of transcription start
GmFtsH11	TATA-box	TATAA	815	5	-	Arabidopsis thaliana	core promoter element around -30 of transcription start
GmFtsH11	TATA-box	TATA	816	4	+	Arabidopsis thaliana	core promoter element around -30 of transcription start
GmFtsH11	TATA-box	ATTATA	1097	6	+	Brassica napus	core promoter element around -30 of transcription start
GmFtsH11	TATA-box	TATATAA	1098	7	-	Arabidopsis thaliana	core promoter element around -30 of transcription start
GmFtsH11	TATA-box	TATATA	1099	6	-	Arabidopsis thaliana	core promoter element around -30 of transcription start
GmFtsH11	TATA-box	ATATAA	1100	6	+	Brassica oleracea	core promoter element around -30 of transcription start
GmFtsH11	TATA-box	TATA	1101	4	-	Arabidopsis thaliana	core promoter element around -30 of transcription start
GmFtsH11	TATA-box	ATATAT	1229	6	-	Brassica napus	core promoter element around -30 of transcription start
GmFtsH11	TATA-box	TATA	1230	4	-	Arabidopsis thaliana	core promoter element around -30 of transcription start
GmFtsH11	TATA-box	TATA	1380	4	-	Arabidopsis thaliana	core promoter element around -30 of transcription start
GmFtsH11	TATA-box	TATAA	1443	5	-	Arabidopsis thaliana	core promoter element around -30 of transcription start
GmFtsH11	TATA-box	TATA	1444	4	-	Arabidopsis thaliana	core promoter element around -30 of transcription start
GmFtsH11	TATA-box	ATTATA	1718	6	+	Brassica napus	core promoter element around -30 of transcription start
GmFtsH11	TATA-box	TATAA	1719	5	-	Arabidopsis thaliana	core promoter element around -30 of transcription start
GmFtsH11	TATA-box	TATA	1720	4	-	Arabidopsis thaliana	core promoter element around -30 of transcription start
GmFtsH11	TATA-box	ATATAT	1757	6	-	Brassica napus	core promoter element around -30 of transcription start
GmFtsH11	TATA-box	TATATA	1758	6	-	Arabidopsis thaliana	core promoter element around -30 of transcription start
GmFtsH11	TATA-box	ATATAT	1759	6	-	Brassica napus	core promoter element around -30 of transcription start
GmFtsH11	TATA-box	TATA	1760	4	-	Arabidopsis thaliana	core promoter element around -30 of transcription start
GmFtsH11	O2-site	GTTGACGTGA	794	9	+	Zea mays	cis-acting regulatory element involved in zein metabolism regulation
GmFtsH11	O2-site	GTTGACGTGA	1422	9	+	Zea mays	cis-acting regulatory element involved in zein metabolism regulation
GmFtsH11	G-Box	CACGTG	797	6	+	Pisum sativum	cis-acting regulatory element involved in light responsiveness
GmFtsH11	G-Box	CACGTG	1425	6	-	Pisum sativum	cis-acting regulatory element involved in light responsiveness
GmFtsH11	CGTCA-motif	CGTCA	295	5	-	Hordeum vulgare	cis-acting regulatory element involved in the MeJA-responsiveness
GmFtsH11	CGTCA-motif	CGTCA	1681	5	-	Hordeum vulgare	cis-acting regulatory element involved in the MeJA-responsiveness
GmFtsH11	TCCC-motif	TCTCCCT	1945	7	+	Spinacia oleracea	part of a light responsive element
GmFtsH11	MYB recognition site	CCGTTG	1958	6	-	Arabidopsis thaliana
GmFtsH11	G-box	CACGTG	797	6	+	Arabidopsis thaliana	cis-acting regulatory element involved in light responsiveness
GmFtsH11	G-box	CACGTG	1425	6	-	Arabidopsis thaliana	cis-acting regulatory element involved in light responsiveness
GmFtsH11	TGA-box	TGACGTAA	1681	8	+	Glycine max	part of an auxin-responsive element
GmFtsH11	TGACG-motif	TGACG	295	5	+	Hordeum vulgare	cis-acting regulatory element involved in the MeJA-responsiveness
GmFtsH11	TGACG-motif	TGACG	1681	5	+	Hordeum vulgare	cis-acting regulatory element involved in the MeJA-responsiveness
GmFtsH11	CAAT-box	CAAT	36	4	-	Nicotiana glutinosa
GmFtsH11	CAAT-box	CCAAT	48	5	-	Arabidopsis thaliana	common cis-acting element in promoter and enhancer regions
GmFtsH11	CAAT-box	CAAT	92	4	-	Nicotiana glutinosa
GmFtsH11	CAAT-box	CAAAT	109	5	-	Pisum sativum	common cis-acting element in promoter and enhancer regions
GmFtsH11	CAAT-box	CAAT	121	4	+	Nicotiana glutinosa
GmFtsH11	CAAT-box	CAAT	145	4	-	Nicotiana glutinosa
GmFtsH11	CAAT-box	CAAT	170	4	-	Nicotiana glutinosa
GmFtsH11	CAAT-box	CAAAT	194	5	+	Pisum sativum	common cis-acting element in promoter and enhancer regions
GmFtsH11	CAAT-box	CAAAT	197	5	-	Pisum sativum	common cis-acting element in promoter and enhancer regions
GmFtsH11	CAAT-box	CAAT	224	4	+	Nicotiana glutinosa
GmFtsH11	CAAT-box	CAAT	276	4	-	Nicotiana glutinosa
GmFtsH11	CAAT-box	CAAAT	323	5	-	Pisum sativum	common cis-acting element in promoter and enhancer regions
GmFtsH11	CAAT-box	CAAAT	383	5	-	Pisum sativum	common cis-acting element in promoter and enhancer regions
GmFtsH11	CAAT-box	CAAAT	478	5	+	Pisum sativum	common cis-acting element in promoter and enhancer regions
GmFtsH11	CAAT-box	CAAT	498	4	+	Nicotiana glutinosa
GmFtsH11	CAAT-box	CAAAT	535	5	+	Pisum sativum	common cis-acting element in promoter and enhancer regions
GmFtsH11	CAAT-box	CAAAT	605	5	-	Pisum sativum	common cis-acting element in promoter and enhancer regions
GmFtsH11	CAAT-box	CAAAT	658	5	-	Pisum sativum	common cis-acting element in promoter and enhancer regions
GmFtsH11	CAAT-box	CAAAT	667	5	+	Pisum sativum	common cis-acting element in promoter and enhancer regions
GmFtsH11	CAAT-box	CAAT	712	4	+	Nicotiana glutinosa
GmFtsH11	CAAT-box	CAAT	720	4	+	Nicotiana glutinosa
GmFtsH11	CAAT-box	CAAT	937	4	+	Nicotiana glutinosa
GmFtsH11	CAAT-box	CAAT	943	4	-	Nicotiana glutinosa
GmFtsH11	CAAT-box	CAAAT	949	5	-	Pisum sativum	common cis-acting element in promoter and enhancer regions
GmFtsH11	CAAT-box	CAAAT	1106	5	+	Pisum sativum	common cis-acting element in promoter and enhancer regions
GmFtsH11	CAAT-box	CAAT	1126	4	+	Nicotiana glutinosa
GmFtsH11	CAAT-box	CAAAT	1163	5	+	Pisum sativum	common cis-acting element in promoter and enhancer regions
GmFtsH11	CAAT-box	CAAAT	1233	5	-	Pisum sativum	common cis-acting element in promoter and enhancer regions
GmFtsH11	CAAT-box	CAAAT	1295	5	+	Pisum sativum	common cis-acting element in promoter and enhancer regions
GmFtsH11	CAAT-box	CAAT	1340	4	+	Nicotiana glutinosa
GmFtsH11	CAAT-box	CAAT	1348	4	+	Nicotiana glutinosa
GmFtsH11	CAAT-box	CAAAT	1508	5	+	Pisum sativum	common cis-acting element in promoter and enhancer regions
GmFtsH11	CAAT-box	CAAT	1565	4	+	Nicotiana glutinosa
GmFtsH11	CAAT-box	CAAT	1571	4	-	Nicotiana glutinosa
GmFtsH11	CAAT-box	CAAAT	1577	5	-	Pisum sativum	common cis-acting element in promoter and enhancer regions
GmFtsH11	CAAT-box	CAAT	1737	4	+	Nicotiana glutinosa
GmFtsH11	CAAT-box	CCAAT	1797	5	+	Arabidopsis thaliana	common cis-acting element in promoter and enhancer regions
GmFtsH11	CAAT-box	CAAT	1798	4	+	Nicotiana glutinosa
GmFtsH11	CAAT-box	CAAT	1889	4	-	Nicotiana glutinosa
GmFtsH11	CAAT-box	CAAT	1896	4	-	Nicotiana glutinosa
GmFtsH11	CAAT-box	CAAT	1953	4	+	Nicotiana glutinosa
GmFtsH11	ATC-motif	AGTAATCT	1779	8	+	Spinacia oleracea	part of a conserved DNA module involved in light responsiveness
GmFtsH11	TC-rich repeats	ATTCTCTAAC	387	9	-	Nicotiana tabacum	cis-acting element involved in defense and stress responsiveness
GmFtsH11	CCAAT-box	CAACGG	1958	6	+	Hordeum vulgare	MYBHv1 binding site
GmFtsH12	A-box	CCGTCC	317	6	+	Petroselinum crispum	cis-acting regulatory element
GmFtsH12	A-box	CCGTCC	352	6	-	Petroselinum crispum	cis-acting regulatory element
GmFtsH12	A-box	CCGTCC	684	6	-	Petroselinum crispum	cis-acting regulatory element
GmFtsH12	GT1-motif	GGTTAAT	838	7	+	Avena sativa	light responsive element
GmFtsH12	GT1-motif	GGTTAA	1476	6	-	Arabidopsis thaliana	light responsive element
GmFtsH12	MYC	CAATTG	559	6	+	Arabidopsis thaliana
GmFtsH12	MYC	CATTTG	878	6	-	Arabidopsis thaliana
GmFtsH12	MYC	CATTTG	1596	6	+	Arabidopsis thaliana
GmFtsH12	AuxRR-core	GGTCCAT	356	7	+	Nicotiana tabacum	cis-acting regulatory element involved in auxin responsiveness
GmFtsH12	GATA-motif	GATAGGA	703	7	-	Arabidopsis thaliana	part of a light responsive element
GmFtsH12	GATA-motif	GATAGGA	922	7	+	Arabidopsis thaliana	part of a light responsive element
GmFtsH12	Myb	TAACTG	1008	6	-	Arabidopsis thaliana
GmFtsH12	Myb	TAACTG	1383	6	-	Arabidopsis thaliana
GmFtsH12	ERE	ATTTCATA	611	8	-	Nicotiana glutinos
GmFtsH12	ERE	ATTTTAAA	740	8	+	Nicotiana glutinos
GmFtsH12	ERE	ATTTTAAA	742	8	-	Nicotiana glutinos
GmFtsH12	Myc	TCTCTTA	985	7	-	Arabidopsis thaliana
GmFtsH12	MYB	CAACCA	22	6	-	Arabidopsis thaliana
GmFtsH12	MYB	TAACCA	1477	6	+	Arabidopsis thaliana
GmFtsH12	TATA	TATAAAAT	493	8	-	Arabidopsis thaliana
GmFtsH12	TATA	TATAAAAT	1652	8	+	Arabidopsis thaliana
GmFtsH12	TATC-box	TATCCCA	854	7	-	Oryza sativa	cis-acting element involved in gibberellin-responsiveness
GmFtsH12	TCCC-motif	TCTCCCT	1317	7	+	Spinacia oleracea	part of a light responsive element
GmFtsH12	STRE	AGGGG	122	5	+	Arabidopsis thaliana
GmFtsH12	STRE	AGGGG	271	5	-	Arabidopsis thaliana
GmFtsH12	CAAT-box	CAAAT	100	5	-	Pisum sativum	common cis-acting element in promoter and enhancer regions
GmFtsH12	CAAT-box	CAAT	178	4	-	Nicotiana glutinosa
GmFtsH12	CAAT-box	CCAAT	203	5	-	Arabidopsis thaliana	common cis-acting element in promoter and enhancer regions
GmFtsH12	CAAT-box	CAAT	210	4	+	Nicotiana glutinosa
GmFtsH12	CAAT-box	CAAT	239	4	-	Nicotiana glutinosa
GmFtsH12	CAAT-box	CAAAT	256	5	-	Pisum sativum	common cis-acting element in promoter and enhancer regions
GmFtsH12	CAAT-box	CCAAT	285	5	-	Arabidopsis thaliana	common cis-acting element in promoter and enhancer regions
GmFtsH12	CAAT-box	CCAAT	330	5	+	Arabidopsis thaliana	common cis-acting element in promoter and enhancer regions
GmFtsH12	CAAT-box	CAAT	331	4	+	Nicotiana glutinosa
GmFtsH12	CAAT-box	CCAAT	338	5	+	Arabidopsis thaliana	common cis-acting element in promoter and enhancer regions
GmFtsH12	CAAT-box	CAAT	339	4	+	Nicotiana glutinosa
GmFtsH12	CAAT-box	CAAT	505	4	+	Nicotiana glutinosa
GmFtsH12	CAAT-box	CAAAT	544	5	+	Pisum sativum	common cis-acting element in promoter and enhancer regions
GmFtsH12	CAAT-box	CAAT	559	4	+	Nicotiana glutinosa
GmFtsH12	CAAT-box	CAAT	561	4	-	Nicotiana glutinosa
GmFtsH12	CAAT-box	CAAAT	589	5	-	Pisum sativum	common cis-acting element in promoter and enhancer regions
GmFtsH12	CAAT-box	CAACCAACTCC	667	10	+	Arabidopsis thaliana	common cis-acting element in promoter and enhancer regions
GmFtsH12	CAAT-box	CAAT	765	4	+	Nicotiana glutinosa
GmFtsH12	CAAT-box	CAAT	784	4	+	Nicotiana glutinosa
GmFtsH12	CAAT-box	CAAAT	878	5	+	Pisum sativum	common cis-acting element in promoter and enhancer regions
GmFtsH12	CAAT-box	CAAT	894	4	+	Nicotiana glutinosa
GmFtsH12	CAAT-box	CAAAT	992	5	-	Pisum sativum	common cis-acting element in promoter and enhancer regions
GmFtsH12	CAAT-box	CAAT	1004	4	+	Nicotiana glutinosa
GmFtsH12	CAAT-box	CAAT	1033	4	-	Nicotiana glutinosa
GmFtsH12	CAAT-box	CAAAT	1068	5	+	Pisum sativum	common cis-acting element in promoter and enhancer regions
GmFtsH12	CAAT-box	CAAAT	1171	5	-	Pisum sativum	common cis-acting element in promoter and enhancer regions
GmFtsH12	CAAT-box	CAAAT	1235	5	+	Pisum sativum	common cis-acting element in promoter and enhancer regions
GmFtsH12	CAAT-box	CAAT	1242	4	+	Nicotiana glutinosa
GmFtsH12	CAAT-box	CAAT	1332	4	+	Nicotiana glutinosa
GmFtsH12	CAAT-box	CCAAT	1413	5	-	Arabidopsis thaliana	common cis-acting element in promoter and enhancer regions
GmFtsH12	CAAT-box	CAAT	1423	4	-	Nicotiana glutinosa
GmFtsH12	CAAT-box	CAAT	1447	4	+	Nicotiana glutinosa
GmFtsH12	CAAT-box	CCAAT	1585	5	+	Arabidopsis thaliana	common cis-acting element in promoter and enhancer regions
GmFtsH12	CAAT-box	CAAT	1586	4	+	Nicotiana glutinosa
GmFtsH12	CAAT-box	CAAAT	1597	5	-	Pisum sativum	common cis-acting element in promoter and enhancer regions
GmFtsH12	CAAT-box	CAAT	1834	4	-	Nicotiana glutinosa
GmFtsH12	CAAT-box	CAAT	1878	4	+	Nicotiana glutinosa
GmFtsH12	CAAT-box	CAAAT	1941	5	+	Pisum sativum	common cis-acting element in promoter and enhancer regions
GmFtsH12	AT1-motif	AATTATTTTTTATT	1772	14	-	Solanum tuberosum	part of a light responsive module
GmFtsH12	TCT-motif	TCTTAC	116	6	-	Arabidopsis thaliana	part of a light responsive element
GmFtsH12	TCT-motif	TCTTAC	263	6	+	Arabidopsis thaliana	part of a light responsive element
GmFtsH12	AT~TATA-box	TATATA	369	6	+	Arabidopsis thaliana
GmFtsH12	AT~TATA-box	TATATAAA	531	8	-	Arabidopsis thaliana
GmFtsH12	AT~TATA-box	TATATA	533	6	+	Arabidopsis thaliana
GmFtsH12	MYB-like sequence	TAACCA	1477	6	+	Arabidopsis thaliana
GmFtsH12	ARE	AAACCA	34	6	-	Zea mays	cis-acting regulatory element essential for the anaerobic induction
GmFtsH12	ARE	AAACCA	415	6	-	Zea mays	cis-acting regulatory element essential for the anaerobic induction
GmFtsH12	ARE	AAACCA	1263	6	+	Zea mays	cis-acting regulatory element essential for the anaerobic induction
GmFtsH12	ARE	AAACCA	1518	6	+	Zea mays	cis-acting regulatory element essential for the anaerobic induction
GmFtsH12	Box 4	ATTAAT	603	6	+	Petroselinum crispum	part of a conserved DNA module involved in light responsiveness
GmFtsH12	Box 4	ATTAAT	1143	6	-	Petroselinum crispum	part of a conserved DNA module involved in light responsiveness
GmFtsH12	Box 4	ATTAAT	1409	6	-	Petroselinum crispum	part of a conserved DNA module involved in light responsiveness
GmFtsH12	Box 4	ATTAAT	1671	6	-	Petroselinum crispum	part of a conserved DNA module involved in light responsiveness
GmFtsH12	Box 4	ATTAAT	1701	6	-	Petroselinum crispum	part of a conserved DNA module involved in light responsiveness
GmFtsH12	Box 4	ATTAAT	1769	6	-	Petroselinum crispum	part of a conserved DNA module involved in light responsiveness
GmFtsH12	MRE	AACCTAA	1110	7	-	Petroselinum crispum	MYB binding site involved in light responsiveness
GmFtsH12	chs-CMA1a	TTACTTAA	171	8	-	Daucus carota	part of a light responsive element
GmFtsH12	chs-CMA1a	TTACTTAA	1744	8	+	Daucus carota	part of a light responsive element
GmFtsH12	WRE3	CCACCT	28	6	-	Pisum sativum
GmFtsH12	TATA-box	ATATAT	368	6	+	Brassica napus	core promoter element around -30 of transcription start
GmFtsH12	TATA-box	TATATA	369	6	+	Arabidopsis thaliana	core promoter element around -30 of transcription start
GmFtsH12	TATA-box	ATATAT	370	6	+	Brassica napus	core promoter element around -30 of transcription start
GmFtsH12	TATA-box	TATA	371	4	+	Arabidopsis thaliana	core promoter element around -30 of transcription start
GmFtsH12	TATA-box	ATATAA	386	6	+	Brassica oleracea	core promoter element around -30 of transcription start
GmFtsH12	TATA-box	TATA	387	4	+	Arabidopsis thaliana	core promoter element around -30 of transcription start
GmFtsH12	TATA-box	TATAAA	425	6	-	Helianthus annuus	core promoter element around -30 of transcription start
GmFtsH12	TATA-box	TATAA	426	5	-	Arabidopsis thaliana	core promoter element around -30 of transcription start
GmFtsH12	TATA-box	TATA	427	4	+	Arabidopsis thaliana	core promoter element around -30 of transcription start
GmFtsH12	TATA-box	TATAAA	441	6	-	Helianthus annuus	core promoter element around -30 of transcription start
GmFtsH12	TATA-box	TATAA	442	5	-	Arabidopsis thaliana	core promoter element around -30 of transcription start
GmFtsH12	TATA-box	TATA	443	4	+	Arabidopsis thaliana	core promoter element around -30 of transcription start
GmFtsH12	TATA-box	TATAAAA	484	7	-	Pisum sativum	core promoter element around -30 of transcription start
GmFtsH12	TATA-box	TATAAA	485	6	-	Helianthus annuus	core promoter element around -30 of transcription start
GmFtsH12	TATA-box	TATAA	486	5	-	Arabidopsis thaliana	core promoter element around -30 of transcription start
GmFtsH12	TATA-box	TATA	487	4	+	Arabidopsis thaliana	core promoter element around -30 of transcription start
GmFtsH12	TATA-box	TATAAAA	494	7	-	Pisum sativum	core promoter element around -30 of transcription start
GmFtsH12	TATA-box	TATAAA	495	6	-	Helianthus annuus	core promoter element around -30 of transcription start
GmFtsH12	TATA-box	TATAA	496	5	-	Arabidopsis thaliana	core promoter element around -30 of transcription start
GmFtsH12	TATA-box	TATA	497	4	+	Arabidopsis thaliana	core promoter element around -30 of transcription start
GmFtsH12	TATA-box	TACAAAA	523	7	+	Oryza sativa	core promoter element around -30 of transcription start
GmFtsH12	TATA-box	taTATAAAtc	529	9	-	Arabidopsis thaliana	core promoter element around -30 of transcription start
GmFtsH12	TATA-box	TATAAAT	530	7	-	Brassica juncea	core promoter element around -30 of transcription start
GmFtsH12	TATA-box	TATAAA	531	6	-	Helianthus annuus	core promoter element around -30 of transcription start
GmFtsH12	TATA-box	TATATAA	532	7	-	Arabidopsis thaliana	core promoter element around -30 of transcription start
GmFtsH12	TATA-box	TATATA	533	6	+	Arabidopsis thaliana	core promoter element around -30 of transcription start
GmFtsH12	TATA-box	ATATAT	534	6	+	Brassica napus	core promoter element around -30 of transcription start
GmFtsH12	TATA-box	TATA	535	4	+	Arabidopsis thaliana	core promoter element around -30 of transcription start
GmFtsH12	TATA-box	ATATAA	982	6	+	Brassica oleracea	core promoter element around -30 of transcription start
GmFtsH12	TATA-box	TATA	983	4	+	Arabidopsis thaliana	core promoter element around -30 of transcription start
GmFtsH12	TATA-box	TATA	1058	4	-	Arabidopsis thaliana	core promoter element around -30 of transcription start
GmFtsH12	TATA-box	ATTATA	1650	6	+	Brassica napus	core promoter element around -30 of transcription start
GmFtsH12	TATA-box	TATAA	1651	5	-	Arabidopsis thaliana	core promoter element around -30 of transcription start
GmFtsH12	TATA-box	TATA	1652	4	-	Arabidopsis thaliana	core promoter element around -30 of transcription start
GmFtsH12	TATA-box	ccTATAAAaa	1684	9	-	Arabidopsis thaliana	core promoter element around -30 of transcription start
GmFtsH12	TATA-box	TATAAAA	1685	7	-	Pisum sativum	core promoter element around -30 of transcription start
GmFtsH12	TATA-box	TATAAA	1686	6	-	Helianthus annuus	core promoter element around -30 of transcription start
GmFtsH12	TATA-box	TATAA	1687	5	-	Arabidopsis thaliana	core promoter element around -30 of transcription start
GmFtsH12	TATA-box	TATA	1688	4	-	Arabidopsis thaliana	core promoter element around -30 of transcription start
GmFtsH12	TATA-box	ATTATA	1824	6	+	Brassica napus	core promoter element around -30 of transcription start
GmFtsH12	TATA-box	TATAA	1825	5	-	Arabidopsis thaliana	core promoter element around -30 of transcription start
GmFtsH12	TATA-box	TATA	1826	4	-	Arabidopsis thaliana	core promoter element around -30 of transcription start
GmFtsH12	TATA-box	ATATAT	1838	6	-	Brassica napus	core promoter element around -30 of transcription start
GmFtsH12	TATA-box	TATA	1839	4	-	Arabidopsis thaliana	core promoter element around -30 of transcription start
GmFtsH12	TATA-box	TATAA	1906	5	-	Arabidopsis thaliana	core promoter element around -30 of transcription start
GmFtsH12	TATA-box	TATA	1907	4	-	Arabidopsis thaliana	core promoter element around -30 of transcription start
GmFtsH12	TATA-box	TATA	1988	4	-	Arabidopsis thaliana	core promoter element around -30 of transcription start
GmFtsH13	TATA	TATAAAAT	1759	8	-	Arabidopsis thaliana
GmFtsH13	TATA	TATAAAAT	1763	8	+	Arabidopsis thaliana
GmFtsH13	ERE	ATTTTAAA	1307	8	+	Nicotiana glutinos
GmFtsH13	ERE	ATTTTAAA	1309	8	-	Nicotiana glutinos
GmFtsH13	ERE	ATTTTAAA	1749	8	+	Nicotiana glutinos
GmFtsH13	MYB-like sequence	TAACCA	696	6	-	Arabidopsis thaliana
GmFtsH13	MYB-like sequence	TAACCA	718	6	+	Arabidopsis thaliana
GmFtsH13	MYB-like sequence	TAACCA	1474	6	+	Arabidopsis thaliana
GmFtsH13	MYB-like sequence	TAACCA	1480	6	+	Arabidopsis thaliana
GmFtsH13	O2-site	GATGATGTGG	1157	9	+	Zea mays	cis-acting regulatory element involved in zein metabolism regulation
GmFtsH13	TATA-box	TACAAAA	10	7	-	Oryza sativa	core promoter element around -30 of transcription start
GmFtsH13	TATA-box	TATACA	13	6	-	Helianthus annuus	core promoter element around -30 of transcription start
GmFtsH13	TATA-box	TATA	15	4	+	Arabidopsis thaliana	core promoter element around -30 of transcription start
GmFtsH13	TATA-box	TATA	26	4	+	Arabidopsis thaliana	core promoter element around -30 of transcription start
GmFtsH13	TATA-box	TATA	98	4	+	Arabidopsis thaliana	core promoter element around -30 of transcription start
GmFtsH13	TATA-box	TACAAAA	365	7	+	Oryza sativa	core promoter element around -30 of transcription start
GmFtsH13	TATA-box	TACAAAA	454	7	-	Oryza sativa	core promoter element around -30 of transcription start
GmFtsH13	TATA-box	ATATAA	583	6	+	Brassica oleracea	core promoter element around -30 of transcription start
GmFtsH13	TATA-box	TATA	584	4	+	Arabidopsis thaliana	core promoter element around -30 of transcription start
GmFtsH13	TATA-box	TATAA	699	5	-	Arabidopsis thaliana	core promoter element around -30 of transcription start
GmFtsH13	TATA-box	TATA	700	4	+	Arabidopsis thaliana	core promoter element around -30 of transcription start
GmFtsH13	TATA-box	ATTATA	1011	6	+	Brassica napus	core promoter element around -30 of transcription start
GmFtsH13	TATA-box	TATAA	1012	5	-	Arabidopsis thaliana	core promoter element around -30 of transcription start
GmFtsH13	TATA-box	TATA	1013	4	-	Arabidopsis thaliana	core promoter element around -30 of transcription start
GmFtsH13	TATA-box	ATTATA	1017	6	+	Brassica napus	core promoter element around -30 of transcription start
GmFtsH13	TATA-box	TATAA	1018	5	-	Arabidopsis thaliana	core promoter element around -30 of transcription start
GmFtsH13	TATA-box	TATA	1019	4	-	Arabidopsis thaliana	core promoter element around -30 of transcription start
GmFtsH13	TATA-box	TATAA	1373	5	-	Arabidopsis thaliana	core promoter element around -30 of transcription start
GmFtsH13	TATA-box	TATA	1374	4	-	Arabidopsis thaliana	core promoter element around -30 of transcription start
GmFtsH13	TATA-box	ATATAA	1471	6	+	Brassica oleracea	core promoter element around -30 of transcription start
GmFtsH13	TATA-box	TATA	1472	4	-	Arabidopsis thaliana	core promoter element around -30 of transcription start
GmFtsH13	TATA-box	TATA	1500	4	-	Arabidopsis thaliana	core promoter element around -30 of transcription start
GmFtsH13	TATA-box	ATTATA	1527	6	+	Brassica napus	core promoter element around -30 of transcription start
GmFtsH13	TATA-box	TATAA	1528	5	-	Arabidopsis thaliana	core promoter element around -30 of transcription start
GmFtsH13	TATA-box	TATA	1529	4	-	Arabidopsis thaliana	core promoter element around -30 of transcription start
GmFtsH13	TATA-box	ATTATA	1575	6	+	Brassica napus	core promoter element around -30 of transcription start
GmFtsH13	TATA-box	TATAA	1576	5	-	Arabidopsis thaliana	core promoter element around -30 of transcription start
GmFtsH13	TATA-box	TATA	1577	4	-	Arabidopsis thaliana	core promoter element around -30 of transcription start
GmFtsH13	TATA-box	TATAAAA	1586	7	-	Pisum sativum	core promoter element around -30 of transcription start
GmFtsH13	TATA-box	TATAAA	1587	6	-	Helianthus annuus	core promoter element around -30 of transcription start
GmFtsH13	TATA-box	TATATAA	1588	7	-	Arabidopsis thaliana	core promoter element around -30 of transcription start
GmFtsH13	TATA-box	TATATA	1589	6	-	Arabidopsis thaliana	core promoter element around -30 of transcription start
GmFtsH13	TATA-box	ATATAA	1590	6	+	Brassica oleracea	core promoter element around -30 of transcription start
GmFtsH13	TATA-box	TATA	1591	4	-	Arabidopsis thaliana	core promoter element around -30 of transcription start
GmFtsH13	TATA-box	TATAA	1598	5	-	Arabidopsis thaliana	core promoter element around -30 of transcription start
GmFtsH13	TATA-box	TATA	1599	4	-	Arabidopsis thaliana	core promoter element around -30 of transcription start
GmFtsH13	TATA-box	TATATAA	1635	7	-	Arabidopsis thaliana	core promoter element around -30 of transcription start
GmFtsH13	TATA-box	TATATA	1636	6	-	Arabidopsis thaliana	core promoter element around -30 of transcription start
GmFtsH13	TATA-box	ATATAT	1637	6	-	Brassica napus	core promoter element around -30 of transcription start
GmFtsH13	TATA-box	TATATA	1638	6	-	Arabidopsis thaliana	core promoter element around -30 of transcription start
GmFtsH13	TATA-box	ATATAA	1639	6	+	Brassica oleracea	core promoter element around -30 of transcription start
GmFtsH13	TATA-box	TATA	1640	4	-	Arabidopsis thaliana	core promoter element around -30 of transcription start
GmFtsH13	TATA-box	ATATAA	1665	6	+	Brassica oleracea	core promoter element around -30 of transcription start
GmFtsH13	TATA-box	TATA	1666	4	-	Arabidopsis thaliana	core promoter element around -30 of transcription start
GmFtsH13	TATA-box	ATATAA	1726	6	+	Brassica oleracea	core promoter element around -30 of transcription start
GmFtsH13	TATA-box	TATA	1727	4	-	Arabidopsis thaliana	core promoter element around -30 of transcription start
GmFtsH13	TATA-box	TATAAAA	1760	7	-	Pisum sativum	core promoter element around -30 of transcription start
GmFtsH13	TATA-box	TATAAA	1761	6	-	Helianthus annuus	core promoter element around -30 of transcription start
GmFtsH13	TATA-box	TATAA	1762	5	-	Arabidopsis thaliana	core promoter element around -30 of transcription start
GmFtsH13	TATA-box	TATA	1763	4	-	Arabidopsis thaliana	core promoter element around -30 of transcription start
GmFtsH13	TATA-box	ATATAT	1769	6	-	Brassica napus	core promoter element around -30 of transcription start
GmFtsH13	TATA-box	TATA	1770	4	-	Arabidopsis thaliana	core promoter element around -30 of transcription start
GmFtsH13	TATA-box	TATACA	1786	6	-	Helianthus annuus	core promoter element around -30 of transcription start
GmFtsH13	TATA-box	TATATA	1788	6	-	Arabidopsis thaliana	core promoter element around -30 of transcription start
GmFtsH13	TATA-box	TATA	1790	4	-	Arabidopsis thaliana	core promoter element around -30 of transcription start
GmFtsH13	TATA-box	TATAA	1811	5	-	Arabidopsis thaliana	core promoter element around -30 of transcription start
GmFtsH13	TATA-box	TATA	1812	4	-	Arabidopsis thaliana	core promoter element around -30 of transcription start
GmFtsH13	TATA-box	TATA	1897	4	-	Arabidopsis thaliana	core promoter element around -30 of transcription start
GmFtsH13	TATA-box	ccTATAAAaa	1938	9	+	Arabidopsis thaliana	core promoter element around -30 of transcription start
GmFtsH13	TATA-box	TATA	1940	4	-	Arabidopsis thaliana	core promoter element around -30 of transcription start
GmFtsH13	CCAAT-box	CAACGG	1237	6	-	Hordeum vulgare	MYBHv1 binding site
GmFtsH13	Box 4	ATTAAT	34	6	+	Petroselinum crispum	part of a conserved DNA module involved in light responsiveness
GmFtsH13	Box 4	ATTAAT	571	6	+	Petroselinum crispum	part of a conserved DNA module involved in light responsiveness
GmFtsH13	Box 4	ATTAAT	1315	6	-	Petroselinum crispum	part of a conserved DNA module involved in light responsiveness
GmFtsH13	Box 4	ATTAAT	1568	6	-	Petroselinum crispum	part of a conserved DNA module involved in light responsiveness
GmFtsH13	Box 4	ATTAAT	1649	6	-	Petroselinum crispum	part of a conserved DNA module involved in light responsiveness
GmFtsH13	Box 4	ATTAAT	1670	6	-	Petroselinum crispum	part of a conserved DNA module involved in light responsiveness
GmFtsH13	Box 4	ATTAAT	1678	6	-	Petroselinum crispum	part of a conserved DNA module involved in light responsiveness
GmFtsH13	Box 4	ATTAAT	1745	6	-	Petroselinum crispum	part of a conserved DNA module involved in light responsiveness
GmFtsH13	Box 4	ATTAAT	1871	6	-	Petroselinum crispum	part of a conserved DNA module involved in light responsiveness
GmFtsH13	ABRE	ACGTG	1130	5	+	Arabidopsis thaliana	cis-acting element involved in the abscisic acid responsiveness
GmFtsH13	AE-box	AGAAACAA	318	8	+	Arabidopsis thaliana	part of a module for light response
GmFtsH13	AE-box	AGAAACAA	723	8	+	Arabidopsis thaliana	part of a module for light response
GmFtsH13	MYB	TAACCA	696	6	-	Arabidopsis thaliana
GmFtsH13	MYB	TAACCA	718	6	+	Arabidopsis thaliana
GmFtsH13	MYB	TAACCA	1474	6	+	Arabidopsis thaliana
GmFtsH13	MYB	TAACCA	1480	6	+	Arabidopsis thaliana
GmFtsH13	I-box	AAGATAAGGCT	679	10	+	Gossypium hirsutum	part of a light responsive element
GmFtsH13	I-box	AGATAAGG	680	8	+	Triticum aestivum	part of a light responsive element
GmFtsH13	WRE3	CCACCT	248	6	-	Pisum sativum
GmFtsH13	WRE3	CCACCT	507	6	+	Pisum sativum
GmFtsH13	MYB recognition site	CCGTTG	1237	6	+	Arabidopsis thaliana
GmFtsH13	WUN-motif	AAATTTCTT	1902	9	-	Nicotiana glutinosa
GmFtsH13	Myb	TAACTG	890	6	+	Arabidopsis thaliana
GmFtsH13	GT1-motif	GGTTAAT	1277	7	+	Avena sativa	light responsive element
GmFtsH13	CAT-box	GCCACT	544	6	+	Arabidopsis thaliana	cis-acting regulatory element related to meristem expression
GmFtsH13	AT~TATA-box	TATATAAA	1587	8	-	Arabidopsis thaliana
GmFtsH13	AT~TATA-box	TATATA	1589	6	-	Arabidopsis thaliana
GmFtsH13	AT~TATA-box	TATATA	1636	6	-	Arabidopsis thaliana
GmFtsH13	AT~TATA-box	TATATA	1638	6	-	Arabidopsis thaliana
GmFtsH13	AT~TATA-box	TATATA	1788	6	-	Arabidopsis thaliana
GmFtsH13	MYC	CATTTG	515	6	+	Arabidopsis thaliana
GmFtsH13	MYC	CATTTG	790	6	+	Arabidopsis thaliana
GmFtsH13	MYC	CAATTG	1054	6	-	Arabidopsis thaliana
GmFtsH13	MYC	CATTTG	1155	6	-	Arabidopsis thaliana
GmFtsH13	MYC	CATTTG	1172	6	-	Arabidopsis thaliana
GmFtsH13	MYC	CATGTG	1561	6	+	Arabidopsis thaliana
GmFtsH13	W box	TTGACC	1492	6	-	Arabidopsis thaliana
GmFtsH13	G-Box	CACGTT	1129	6	-	Pisum sativum	cis-acting regulatory element involved in light responsiveness
GmFtsH13	CAAT-box	CAAT	54	4	-	Nicotiana glutinosa
GmFtsH13	CAAT-box	CCAAT	89	5	+	Arabidopsis thaliana	common cis-acting element in promoter and enhancer regions
GmFtsH13	CAAT-box	CAAT	90	4	+	Nicotiana glutinosa
GmFtsH13	CAAT-box	CAAT	95	4	+	Nicotiana glutinosa
GmFtsH13	CAAT-box	CAAAT	141	5	-	Pisum sativum	common cis-acting element in promoter and enhancer regions
GmFtsH13	CAAT-box	CAAAT	184	5	+	Pisum sativum	common cis-acting element in promoter and enhancer regions
GmFtsH13	CAAT-box	CAAAT	209	5	+	Pisum sativum	common cis-acting element in promoter and enhancer regions
GmFtsH13	CAAT-box	CAAAT	262	5	-	Pisum sativum	common cis-acting element in promoter and enhancer regions
GmFtsH13	CAAT-box	CAAT	428	4	+	Nicotiana glutinosa
GmFtsH13	CAAT-box	CAAT	438	4	-	Nicotiana glutinosa
GmFtsH13	CAAT-box	CAAAT	516	5	-	Pisum sativum	common cis-acting element in promoter and enhancer regions
GmFtsH13	CAAT-box	CAAT	581	4	+	Nicotiana glutinosa
GmFtsH13	CAAT-box	CCAAT	623	5	-	Arabidopsis thaliana	common cis-acting element in promoter and enhancer regions
GmFtsH13	CAAT-box	CAAT	637	4	-	Nicotiana glutinosa
GmFtsH13	CAAT-box	CAAT	645	4	-	Nicotiana glutinosa
GmFtsH13	CAAT-box	CAAT	728	4	+	Nicotiana glutinosa
GmFtsH13	CAAT-box	CCAAT	748	5	+	Arabidopsis thaliana	common cis-acting element in promoter and enhancer regions
GmFtsH13	CAAT-box	CAAT	749	4	+	Nicotiana glutinosa
GmFtsH13	CAAT-box	CAAAT	774	5	-	Pisum sativum	common cis-acting element in promoter and enhancer regions
GmFtsH13	CAAT-box	CAAAT	791	5	-	Pisum sativum	common cis-acting element in promoter and enhancer regions
GmFtsH13	CAAT-box	CAAT	813	4	-	Nicotiana glutinosa
GmFtsH13	CAAT-box	CAAT	862	4	-	Nicotiana glutinosa
GmFtsH13	CAAT-box	CAAAT	876	5	-	Pisum sativum	common cis-acting element in promoter and enhancer regions
GmFtsH13	CAAT-box	CAAT	881	4	-	Nicotiana glutinosa
GmFtsH13	CAAT-box	CAAT	926	4	-	Nicotiana glutinosa
GmFtsH13	CAAT-box	CAAT	942	4	+	Nicotiana glutinosa
GmFtsH13	CAAT-box	CAAT	1054	4	+	Nicotiana glutinosa
GmFtsH13	CAAT-box	CAAT	1056	4	-	Nicotiana glutinosa
GmFtsH13	CAAT-box	CAAAT	1092	5	-	Pisum sativum	common cis-acting element in promoter and enhancer regions
GmFtsH13	CAAT-box	CAAAT	1155	5	+	Pisum sativum	common cis-acting element in promoter and enhancer regions
GmFtsH13	CAAT-box	CAAAT	1172	5	+	Pisum sativum	common cis-acting element in promoter and enhancer regions
GmFtsH13	CAAT-box	CAAT	1206	4	-	Nicotiana glutinosa
GmFtsH13	CAAT-box	CAAT	1254	4	-	Nicotiana glutinosa
GmFtsH13	CAAT-box	CAAT	1338	4	-	Nicotiana glutinosa
GmFtsH13	CAAT-box	CAAT	1439	4	+	Nicotiana glutinosa
GmFtsH13	CAAT-box	CAAT	1495	4	+	Nicotiana glutinosa
GmFtsH13	CAAT-box	CAAT	1542	4	-	Nicotiana glutinosa
GmFtsH13	CAAT-box	CAAT	1547	4	+	Nicotiana glutinosa
GmFtsH13	CAAT-box	CAAAT	1723	5	+	Pisum sativum	common cis-acting element in promoter and enhancer regions
GmFtsH13	CAAT-box	CAAT	1781	4	+	Nicotiana glutinosa
GmFtsH13	CAAT-box	CAAAT	1783	5	-	Pisum sativum	common cis-acting element in promoter and enhancer regions
GmFtsH13	CAAT-box	CAAT	1795	4	-	Nicotiana glutinosa
GmFtsH13	CAAT-box	CCAAT	1802	5	-	Arabidopsis thaliana	common cis-acting element in promoter and enhancer regions
GmFtsH13	MRE	AACCTAA	373	7	-	Petroselinum crispum	MYB binding site involved in light responsiveness
GmFtsH13	TCA-element	CCATCTTTTT	442	9	+	Nicotiana tabacum	cis-acting element involved in salicylic acid responsiveness
GmFtsH13	TC-rich repeats	GTTTTCTTAC	1036	9	+	Nicotiana tabacum	cis-acting element involved in defense and stress responsiveness
GmFtsH13	ARE	AAACCA	1949	6	+	Zea mays	cis-acting regulatory element essential for the anaerobic induction
GmFtsH13	P-box	CCTTTTG	767	7	+	Oryza sativa	gibberellin-responsive element
GmFtsH14	GC-motif	CCCCCG	890	6	+	Zea mays	enhancer-like element involved in anoxic specific inducibility
GmFtsH14	Myb	TAACTG	1939	6	+	Arabidopsis thaliana
GmFtsH14	ABRE	CACGTG	463	6	+	Arabidopsis thaliana	cis-acting element involved in the abscisic acid responsiveness
GmFtsH14	ABRE	ACGTG	464	5	+	Arabidopsis thaliana	cis-acting element involved in the abscisic acid responsiveness
GmFtsH14	ABRE	CACGTG	520	6	+	Arabidopsis thaliana	cis-acting element involved in the abscisic acid responsiveness
GmFtsH14	ABRE	ACGTG	521	5	+	Arabidopsis thaliana	cis-acting element involved in the abscisic acid responsiveness
GmFtsH14	ABRE	CACGTG	877	6	+	Arabidopsis thaliana	cis-acting element involved in the abscisic acid responsiveness
GmFtsH14	ABRE	ACGTG	878	5	+	Arabidopsis thaliana	cis-acting element involved in the abscisic acid responsiveness
GmFtsH14	ABRE	ACGTG	1826	5	-	Arabidopsis thaliana	cis-acting element involved in the abscisic acid responsiveness
GmFtsH14	G-box	ACACGTGT	462	8	+	Brassica napus	cis-acting regulatory element involved in light responsiveness
GmFtsH14	G-box	CACGTG	463	6	+	Arabidopsis thaliana	cis-acting regulatory element involved in light responsiveness
GmFtsH14	G-box	ACACGTGT	519	8	+	Brassica napus	cis-acting regulatory element involved in light responsiveness
GmFtsH14	G-box	CACGTG	520	6	+	Arabidopsis thaliana	cis-acting regulatory element involved in light responsiveness
GmFtsH14	G-box	CACGTG	877	6	+	Arabidopsis thaliana	cis-acting regulatory element involved in light responsiveness
GmFtsH14	G-box	CACGTC	1826	6	+	Zea mays	cis-acting regulatory element involved in light responsiveness
GmFtsH14	AT~TATA-box	TATATA	967	6	+	Arabidopsis thaliana
GmFtsH14	AT~TATA-box	TATATA	1305	6	-	Arabidopsis thaliana
GmFtsH14	AT~TATA-box	TATATA	1307	6	-	Arabidopsis thaliana
GmFtsH14	AT~TATA-box	TATATA	1344	6	-	Arabidopsis thaliana
GmFtsH14	AT~TATA-box	TATATA	1393	6	-	Arabidopsis thaliana
GmFtsH14	AT~TATA-box	TATATA	1522	6	-	Arabidopsis thaliana
GmFtsH14	AT~TATA-box	TATATA	1629	6	-	Arabidopsis thaliana
GmFtsH14	AT~TATA-box	TATATA	1725	6	-	Arabidopsis thaliana
GmFtsH14	TGA-element	AACGAC	183	6	-	Brassica oleracea	auxin-responsive element
GmFtsH14	ERE	ATTTCATA	587	8	-	Nicotiana glutinos
GmFtsH14	ERE	ATTTTAAA	1098	8	+	Nicotiana glutinos
GmFtsH14	ERE	ATTTTAAA	1100	8	-	Nicotiana glutinos
GmFtsH14	ERE	ATTTTAAA	1400	8	+	Nicotiana glutinos
GmFtsH14	ERE	ATTTTAAA	1477	8	+	Nicotiana glutinos
GmFtsH14	ERE	ATTTTAAA	1693	8	+	Nicotiana glutinos
GmFtsH14	MYC	CATTTG	393	6	+	Arabidopsis thaliana
GmFtsH14	MYB recognition site	CCGTTG	1808	6	-	Arabidopsis thaliana
GmFtsH14	Box 4	ATTAAT	480	6	+	Petroselinum crispum	part of a conserved DNA module involved in light responsiveness
GmFtsH14	Box 4	ATTAAT	1106	6	-	Petroselinum crispum	part of a conserved DNA module involved in light responsiveness
GmFtsH14	Box 4	ATTAAT	1253	6	-	Petroselinum crispum	part of a conserved DNA module involved in light responsiveness
GmFtsH14	Box 4	ATTAAT	1275	6	-	Petroselinum crispum	part of a conserved DNA module involved in light responsiveness
GmFtsH14	Box 4	ATTAAT	1295	6	-	Petroselinum crispum	part of a conserved DNA module involved in light responsiveness
GmFtsH14	Box 4	ATTAAT	1360	6	-	Petroselinum crispum	part of a conserved DNA module involved in light responsiveness
GmFtsH14	Box 4	ATTAAT	1448	6	-	Petroselinum crispum	part of a conserved DNA module involved in light responsiveness
GmFtsH14	Box 4	ATTAAT	1893	6	-	Petroselinum crispum	part of a conserved DNA module involved in light responsiveness
GmFtsH14	CCAAT-box	CAACGG	1808	6	+	Hordeum vulgare	MYBHv1 binding site
GmFtsH14	TCCC-motif	TCTCCCT	61	7	+	Spinacia oleracea	part of a light responsive element
GmFtsH14	CAAT-box	CAAAT	109	5	-	Pisum sativum	common cis-acting element in promoter and enhancer regions
GmFtsH14	CAAT-box	CCAAT	127	5	-	Arabidopsis thaliana	common cis-acting element in promoter and enhancer regions
GmFtsH14	CAAT-box	CAAT	192	4	-	Nicotiana glutinosa
GmFtsH14	CAAT-box	CAAAT	394	5	-	Pisum sativum	common cis-acting element in promoter and enhancer regions
GmFtsH14	CAAT-box	CAAAT	399	5	-	Pisum sativum	common cis-acting element in promoter and enhancer regions
GmFtsH14	CAAT-box	CAAAT	473	5	-	Pisum sativum	common cis-acting element in promoter and enhancer regions
GmFtsH14	CAAT-box	CAAT	654	4	+	Nicotiana glutinosa
GmFtsH14	CAAT-box	CAAT	799	4	-	Nicotiana glutinosa
GmFtsH14	CAAT-box	CAAT	958	4	+	Nicotiana glutinosa
GmFtsH14	CAAT-box	CCAAT	989	5	-	Arabidopsis thaliana	common cis-acting element in promoter and enhancer regions
GmFtsH14	CAAT-box	CCAAT	995	5	-	Arabidopsis thaliana	common cis-acting element in promoter and enhancer regions
GmFtsH14	CAAT-box	CAAT	1009	4	-	Nicotiana glutinosa
GmFtsH14	CAAT-box	CAAT	1079	4	-	Nicotiana glutinosa
GmFtsH14	CAAT-box	CCAAT	1208	5	+	Arabidopsis thaliana	common cis-acting element in promoter and enhancer regions
GmFtsH14	CAAT-box	CAAT	1209	4	+	Nicotiana glutinosa
GmFtsH14	CAAT-box	CAAAT	1232	5	+	Pisum sativum	common cis-acting element in promoter and enhancer regions
GmFtsH14	CAAT-box	CAAAT	1272	5	+	Pisum sativum	common cis-acting element in promoter and enhancer regions
GmFtsH14	CAAT-box	CAAAT	1430	5	-	Pisum sativum	common cis-acting element in promoter and enhancer regions
GmFtsH14	CAAT-box	CAAT	1458	4	+	Nicotiana glutinosa
GmFtsH14	CAAT-box	CAAAT	1561	5	+	Pisum sativum	common cis-acting element in promoter and enhancer regions
GmFtsH14	CAAT-box	CAAT	1588	4	-	Nicotiana glutinosa
GmFtsH14	CAAT-box	CAAT	1604	4	+	Nicotiana glutinosa
GmFtsH14	CAAT-box	CAAT	1645	4	+	Nicotiana glutinosa
GmFtsH14	CAAT-box	CCAAT	1765	5	+	Arabidopsis thaliana	common cis-acting element in promoter and enhancer regions
GmFtsH14	CAAT-box	CAAT	1766	4	+	Nicotiana glutinosa
GmFtsH14	CAAT-box	CCAAT	1850	5	+	Arabidopsis thaliana	common cis-acting element in promoter and enhancer regions
GmFtsH14	CAAT-box	CAAT	1851	4	+	Nicotiana glutinosa
GmFtsH14	CAAT-box	CAAT	1947	4	+	Nicotiana glutinosa
GmFtsH14	chs-CMA2a	TCACTTGA	304	8	+	Petroselinum crispum	part of a light responsive element
GmFtsH14	GT1-motif	GGTTAA	197	6	-	Arabidopsis thaliana	light responsive element
GmFtsH14	GT1-motif	GGTTAAT	1093	7	+	Avena sativa	light responsive element
GmFtsH14	GT1-motif	GGTTAA	1267	6	-	Arabidopsis thaliana	light responsive element
GmFtsH14	MYB	TAACCA	1062	6	-	Arabidopsis thaliana
GmFtsH14	MYB	TAACCA	1092	6	-	Arabidopsis thaliana
GmFtsH14	MYB	TAACCA	1268	6	+	Arabidopsis thaliana
GmFtsH14	MYB	CAACCA	1838	6	+	Arabidopsis thaliana
GmFtsH14	I-box	AGATAAGG	1046	8	+	Triticum aestivum	part of a light responsive element
GmFtsH14	TATA	TATAAAAT	1033	8	+	Arabidopsis thaliana
GmFtsH14	TATA	TATAAAAT	1215	8	-	Arabidopsis thaliana
GmFtsH14	TATA	TATAAAAT	1286	8	+	Arabidopsis thaliana
GmFtsH14	TATA	TATAAAAT	1487	8	+	Arabidopsis thaliana
GmFtsH14	TATA	TATAAAAT	1631	8	+	Arabidopsis thaliana
GmFtsH14	TATA	TATAAAAT	1727	8	+	Arabidopsis thaliana
GmFtsH14	WRE3	CCACCT	635	6	-	Pisum sativum
GmFtsH14	WRE3	CCACCT	869	6	+	Pisum sativum
GmFtsH14	WRE3	CCACCT	1121	6	-	Pisum sativum
GmFtsH14	STRE	AGGGG	557	5	-	Arabidopsis thaliana
GmFtsH14	STRE	AGGGG	773	5	-	Arabidopsis thaliana
GmFtsH14	LTR	CCGAAA	265	6	+	Hordeum vulgare	cis-acting element involved in low-temperature responsiveness
GmFtsH14	LTR	CCGAAA	602	6	+	Hordeum vulgare	cis-acting element involved in low-temperature responsiveness
GmFtsH14	W box	TTGACC	665	6	+	Arabidopsis thaliana
GmFtsH14	W box	TTGACC	852	6	+	Arabidopsis thaliana
GmFtsH14	TATA-box	TATA	2	4	+	Arabidopsis thaliana	core promoter element around -30 of transcription start
GmFtsH14	TATA-box	TATA	10	4	+	Arabidopsis thaliana	core promoter element around -30 of transcription start
GmFtsH14	TATA-box	TACAAAA	723	7	+	Oryza sativa	core promoter element around -30 of transcription start
GmFtsH14	TATA-box	TATA	756	4	+	Arabidopsis thaliana	core promoter element around -30 of transcription start
GmFtsH14	TATA-box	ATTATA	946	6	+	Brassica napus	core promoter element around -30 of transcription start
GmFtsH14	TATA-box	TATAA	947	5	-	Arabidopsis thaliana	core promoter element around -30 of transcription start
GmFtsH14	TATA-box	TATA	948	4	+	Arabidopsis thaliana	core promoter element around -30 of transcription start
GmFtsH14	TATA-box	ATATAT	952	6	+	Brassica napus	core promoter element around -30 of transcription start
GmFtsH14	TATA-box	TATA	953	4	+	Arabidopsis thaliana	core promoter element around -30 of transcription start
GmFtsH14	TATA-box	ATTATA	965	6	+	Brassica napus	core promoter element around -30 of transcription start
GmFtsH14	TATA-box	TATATAA	966	7	-	Arabidopsis thaliana	core promoter element around -30 of transcription start
GmFtsH14	TATA-box	TATATA	967	6	+	Arabidopsis thaliana	core promoter element around -30 of transcription start
GmFtsH14	TATA-box	ATATAA	968	6	+	Brassica oleracea	core promoter element around -30 of transcription start
GmFtsH14	TATA-box	TATA	969	4	+	Arabidopsis thaliana	core promoter element around -30 of transcription start
GmFtsH14	TATA-box	ATATAA	1032	6	+	Brassica oleracea	core promoter element around -30 of transcription start
GmFtsH14	TATA-box	TATA	1033	4	-	Arabidopsis thaliana	core promoter element around -30 of transcription start
GmFtsH14	TATA-box	ATATAT	1129	6	-	Brassica napus	core promoter element around -30 of transcription start
GmFtsH14	TATA-box	TATA	1130	4	-	Arabidopsis thaliana	core promoter element around -30 of transcription start
GmFtsH14	TATA-box	ATTATA	1163	6	+	Brassica napus	core promoter element around -30 of transcription start
GmFtsH14	TATA-box	TATAA	1164	5	-	Arabidopsis thaliana	core promoter element around -30 of transcription start
GmFtsH14	TATA-box	TATA	1165	4	-	Arabidopsis thaliana	core promoter element around -30 of transcription start
GmFtsH14	TATA-box	ATATAT	1211	6	-	Brassica napus	core promoter element around -30 of transcription start
GmFtsH14	TATA-box	TATA	1212	4	-	Arabidopsis thaliana	core promoter element around -30 of transcription start
GmFtsH14	TATA-box	TATAAAA	1216	7	-	Pisum sativum	core promoter element around -30 of transcription start
GmFtsH14	TATA-box	TATAAA	1217	6	-	Helianthus annuus	core promoter element around -30 of transcription start
GmFtsH14	TATA-box	TATAA	1218	5	-	Arabidopsis thaliana	core promoter element around -30 of transcription start
GmFtsH14	TATA-box	TATA	1219	4	-	Arabidopsis thaliana	core promoter element around -30 of transcription start
GmFtsH14	TATA-box	TACAAAA	1258	7	+	Oryza sativa	core promoter element around -30 of transcription start
GmFtsH14	TATA-box	ATTATA	1279	6	+	Brassica napus	core promoter element around -30 of transcription start
GmFtsH14	TATA-box	TATAA	1280	5	-	Arabidopsis thaliana	core promoter element around -30 of transcription start
GmFtsH14	TATA-box	TATA	1281	4	-	Arabidopsis thaliana	core promoter element around -30 of transcription start
GmFtsH14	TATA-box	ATTATA	1284	6	+	Brassica napus	core promoter element around -30 of transcription start
GmFtsH14	TATA-box	TATAA	1285	5	-	Arabidopsis thaliana	core promoter element around -30 of transcription start
GmFtsH14	TATA-box	TATA	1286	4	-	Arabidopsis thaliana	core promoter element around -30 of transcription start
GmFtsH14	TATA-box	TATATA	1305	6	-	Arabidopsis thaliana	core promoter element around -30 of transcription start
GmFtsH14	TATA-box	ATATAT	1306	6	-	Brassica napus	core promoter element around -30 of transcription start
GmFtsH14	TATA-box	TATATA	1307	6	-	Arabidopsis thaliana	core promoter element around -30 of transcription start
GmFtsH14	TATA-box	ATATAA	1308	6	+	Brassica oleracea	core promoter element around -30 of transcription start
GmFtsH14	TATA-box	TATA	1309	4	-	Arabidopsis thaliana	core promoter element around -30 of transcription start
GmFtsH14	TATA-box	TATAAAT	1321	7	-	Brassica juncea	core promoter element around -30 of transcription start
GmFtsH14	TATA-box	TATAAA	1322	6	-	Helianthus annuus	core promoter element around -30 of transcription start
GmFtsH14	TATA-box	TATAA	1323	5	-	Arabidopsis thaliana	core promoter element around -30 of transcription start
GmFtsH14	TATA-box	TATA	1324	4	-	Arabidopsis thaliana	core promoter element around -30 of transcription start
GmFtsH14	TATA-box	TATACA	1329	6	-	Helianthus annuus	core promoter element around -30 of transcription start
GmFtsH14	TATA-box	TATA	1331	4	-	Arabidopsis thaliana	core promoter element around -30 of transcription start
GmFtsH14	TATA-box	ATATAT	1343	6	-	Brassica napus	core promoter element around -30 of transcription start
GmFtsH14	TATA-box	TATATA	1344	6	-	Arabidopsis thaliana	core promoter element around -30 of transcription start
GmFtsH14	TATA-box	ATATAA	1345	6	+	Brassica oleracea	core promoter element around -30 of transcription start
GmFtsH14	TATA-box	TATA	1346	4	-	Arabidopsis thaliana	core promoter element around -30 of transcription start
GmFtsH14	TATA-box	TATTTAAA	1352	8	-	Arabidopsis thaliana	core promoter element around -30 of transcription start
GmFtsH14	TATA-box	ATATAT	1378	6	-	Brassica napus	core promoter element around -30 of transcription start
GmFtsH14	TATA-box	TATA	1379	4	-	Arabidopsis thaliana	core promoter element around -30 of transcription start
GmFtsH14	TATA-box	ATATAT	1392	6	-	Brassica napus	core promoter element around -30 of transcription start
GmFtsH14	TATA-box	TATATA	1393	6	-	Arabidopsis thaliana	core promoter element around -30 of transcription start
GmFtsH14	TATA-box	ATATAA	1394	6	+	Brassica oleracea	core promoter element around -30 of transcription start
GmFtsH14	TATA-box	TATA	1395	4	-	Arabidopsis thaliana	core promoter element around -30 of transcription start
GmFtsH14	TATA-box	TATTTAAA	1402	8	-	Arabidopsis thaliana	core promoter element around -30 of transcription start
GmFtsH14	TATA-box	TATACA	1433	6	-	Helianthus annuus	core promoter element around -30 of transcription start
GmFtsH14	TATA-box	TATA	1435	4	-	Arabidopsis thaliana	core promoter element around -30 of transcription start
GmFtsH14	TATA-box	TATACA	1485	6	-	Helianthus annuus	core promoter element around -30 of transcription start
GmFtsH14	TATA-box	TATA	1487	4	-	Arabidopsis thaliana	core promoter element around -30 of transcription start
GmFtsH14	TATA-box	TAAAGATT	1503	8	+	Arabidopsis thaliana	core promoter element around -30 of transcription start
GmFtsH14	TATA-box	taTATAAAtc	1507	9	-	Arabidopsis thaliana	core promoter element around -30 of transcription start
GmFtsH14	TATA-box	TATAAAT	1508	7	-	Brassica juncea	core promoter element around -30 of transcription start
GmFtsH14	TATA-box	TATAAA	1509	6	-	Helianthus annuus	core promoter element around -30 of transcription start
GmFtsH14	TATA-box	TATAA	1510	5	-	Arabidopsis thaliana	core promoter element around -30 of transcription start
GmFtsH14	TATA-box	TATA	1511	4	-	Arabidopsis thaliana	core promoter element around -30 of transcription start
GmFtsH14	TATA-box	ATTATA	1520	6	+	Brassica napus	core promoter element around -30 of transcription start
GmFtsH14	TATA-box	TATATAA	1521	7	-	Arabidopsis thaliana	core promoter element around -30 of transcription start
GmFtsH14	TATA-box	TATATA	1522	6	-	Arabidopsis thaliana	core promoter element around -30 of transcription start
GmFtsH14	TATA-box	ATATAA	1523	6	+	Brassica oleracea	core promoter element around -30 of transcription start
GmFtsH14	TATA-box	TATA	1524	4	-	Arabidopsis thaliana	core promoter element around -30 of transcription start
GmFtsH14	TATA-box	TATTTAAA	1551	8	-	Arabidopsis thaliana	core promoter element around -30 of transcription start
GmFtsH14	TATA-box	ATTATA	1627	6	+	Brassica napus	core promoter element around -30 of transcription start
GmFtsH14	TATA-box	TATATAA	1628	7	-	Arabidopsis thaliana	core promoter element around -30 of transcription start
GmFtsH14	TATA-box	TATATA	1629	6	-	Arabidopsis thaliana	core promoter element around -30 of transcription start
GmFtsH14	TATA-box	ATATAA	1630	6	+	Brassica oleracea	core promoter element around -30 of transcription start
GmFtsH14	TATA-box	TATA	1631	4	-	Arabidopsis thaliana	core promoter element around -30 of transcription start
GmFtsH14	TATA-box	TATTTAAA	1652	8	+	Arabidopsis thaliana	core promoter element around -30 of transcription start
GmFtsH14	TATA-box	TATTTAAA	1695	8	-	Arabidopsis thaliana	core promoter element around -30 of transcription start
GmFtsH14	TATA-box	ATATAT	1724	6	-	Brassica napus	core promoter element around -30 of transcription start
GmFtsH14	TATA-box	TATATA	1725	6	-	Arabidopsis thaliana	core promoter element around -30 of transcription start
GmFtsH14	TATA-box	ATATAA	1726	6	+	Brassica oleracea	core promoter element around -30 of transcription start
GmFtsH14	TATA-box	TATA	1727	4	-	Arabidopsis thaliana	core promoter element around -30 of transcription start
GmFtsH14	TATA-box	ATATAT	1759	6	-	Brassica napus	core promoter element around -30 of transcription start
GmFtsH14	TATA-box	TATA	1760	4	-	Arabidopsis thaliana	core promoter element around -30 of transcription start
GmFtsH14	TATA-box	taTATAAAtc	1874	9	+	Arabidopsis thaliana	core promoter element around -30 of transcription start
GmFtsH14	TATA-box	TATAA	1969	5	-	Arabidopsis thaliana	core promoter element around -30 of transcription start
GmFtsH14	TATA-box	TATA	1970	4	-	Arabidopsis thaliana	core promoter element around -30 of transcription start
GmFtsH14	ARE	AAACCA	235	6	-	Zea mays	cis-acting regulatory element essential for the anaerobic induction
GmFtsH14	ARE	AAACCA	498	6	-	Zea mays	cis-acting regulatory element essential for the anaerobic induction
GmFtsH14	MYB-like sequence	TAACCA	1062	6	-	Arabidopsis thaliana
GmFtsH14	MYB-like sequence	TAACCA	1092	6	-	Arabidopsis thaliana
GmFtsH14	MYB-like sequence	TAACCA	1268	6	+	Arabidopsis thaliana
GmFtsH14	AE-box	AGAAACTT	491	8	+	Arabidopsis thaliana	part of a module for light response
GmFtsH14	G-Box	CACGTG	463	6	+	Pisum sativum	cis-acting regulatory element involved in light responsiveness
GmFtsH14	G-Box	CACGTG	520	6	+	Pisum sativum	cis-acting regulatory element involved in light responsiveness
GmFtsH14	G-Box	CACGTG	877	6	+	Pisum sativum	cis-acting regulatory element involved in light responsiveness
GmFtsH15	MYC	CATGTG	351	6	-	Arabidopsis thaliana
GmFtsH15	MYC	CATTTG	435	6	-	Arabidopsis thaliana
GmFtsH15	MYC	CATGTG	636	6	+	Arabidopsis thaliana
GmFtsH15	AT~TATA-box	TATATA	735	6	+	Arabidopsis thaliana
GmFtsH15	AT~TATA-box	TATATA	795	6	+	Arabidopsis thaliana
GmFtsH15	AT~TATA-box	TATATAAA	986	8	-	Arabidopsis thaliana
GmFtsH15	AT~TATA-box	TATATA	988	6	+	Arabidopsis thaliana
GmFtsH15	AT~TATA-box	TATATAAA	1087	8	-	Arabidopsis thaliana
GmFtsH15	AT~TATA-box	TATATA	1089	6	-	Arabidopsis thaliana
GmFtsH15	AT~TATA-box	TATATA	1132	6	-	Arabidopsis thaliana
GmFtsH15	AT~TATA-box	TATATA	1205	6	-	Arabidopsis thaliana
GmFtsH15	AT~TATA-box	TATATA	1207	6	-	Arabidopsis thaliana
GmFtsH15	AT~TATA-box	TATATA	1209	6	-	Arabidopsis thaliana
GmFtsH15	AT~TATA-box	TATATA	1211	6	-	Arabidopsis thaliana
GmFtsH15	AT~TATA-box	TATATA	1213	6	-	Arabidopsis thaliana
GmFtsH15	AT~TATA-box	TATATA	1215	6	-	Arabidopsis thaliana
GmFtsH15	AT~TATA-box	TATATA	1217	6	-	Arabidopsis thaliana
GmFtsH15	AT~TATA-box	TATATA	1219	6	-	Arabidopsis thaliana
GmFtsH15	AT~TATA-box	TATATA	1221	6	-	Arabidopsis thaliana
GmFtsH15	AT~TATA-box	TATATA	1223	6	-	Arabidopsis thaliana
GmFtsH15	AT~TATA-box	TATATA	1225	6	-	Arabidopsis thaliana
GmFtsH15	AT~TATA-box	TATATA	1227	6	-	Arabidopsis thaliana
GmFtsH15	AT~TATA-box	TATATA	1229	6	-	Arabidopsis thaliana
GmFtsH15	AT~TATA-box	TATATA	1231	6	-	Arabidopsis thaliana
GmFtsH15	AT~TATA-box	TATATA	1233	6	-	Arabidopsis thaliana
GmFtsH15	AT~TATA-box	TATATA	1235	6	-	Arabidopsis thaliana
GmFtsH15	AT~TATA-box	TATATA	1237	6	-	Arabidopsis thaliana
GmFtsH15	AT~TATA-box	TATATA	1239	6	-	Arabidopsis thaliana
GmFtsH15	AT~TATA-box	TATATA	1241	6	-	Arabidopsis thaliana
GmFtsH15	AT~TATA-box	TATATA	1243	6	-	Arabidopsis thaliana
GmFtsH15	AT~TATA-box	TATATA	1288	6	-	Arabidopsis thaliana
GmFtsH15	TATC-box	TATCCCA	1782	7	-	Oryza sativa	cis-acting element involved in gibberellin-responsiveness
GmFtsH15	TATC-box	TATCCCA	1911	7	-	Oryza sativa	cis-acting element involved in gibberellin-responsiveness
GmFtsH15	Myb	TAACTG	1536	6	+	Arabidopsis thaliana
GmFtsH15	W box	TTGACC	777	6	-	Arabidopsis thaliana
GmFtsH15	W box	TTGACC	1632	6	-	Arabidopsis thaliana
GmFtsH15	TC-rich repeats	GTTTTCTTAC	1427	9	-	Nicotiana tabacum	cis-acting element involved in defense and stress responsiveness
GmFtsH15	AT1-motif	AATTATTTTTTATT	1247	13	+	Solanum tuberosum	part of a light responsive module
GmFtsH15	TATA-box	ATTATA	105	6	+	Brassica napus	core promoter element around -30 of transcription start
GmFtsH15	TATA-box	TATAA	106	5	-	Arabidopsis thaliana	core promoter element around -30 of transcription start
GmFtsH15	TATA-box	TATA	107	4	+	Arabidopsis thaliana	core promoter element around -30 of transcription start
GmFtsH15	TATA-box	TATTTAAA	245	8	+	Arabidopsis thaliana	core promoter element around -30 of transcription start
GmFtsH15	TATA-box	TATAAAA	314	7	-	Pisum sativum	core promoter element around -30 of transcription start
GmFtsH15	TATA-box	TATAAA	315	6	-	Helianthus annuus	core promoter element around -30 of transcription start
GmFtsH15	TATA-box	TATAA	316	5	-	Arabidopsis thaliana	core promoter element around -30 of transcription start
GmFtsH15	TATA-box	TATA	317	4	+	Arabidopsis thaliana	core promoter element around -30 of transcription start
GmFtsH15	TATA-box	ATATAA	324	6	+	Brassica oleracea	core promoter element around -30 of transcription start
GmFtsH15	TATA-box	TATA	325	4	+	Arabidopsis thaliana	core promoter element around -30 of transcription start
GmFtsH15	TATA-box	TACAAAA	472	7	+	Oryza sativa	core promoter element around -30 of transcription start
GmFtsH15	TATA-box	ATATAA	518	6	+	Brassica oleracea	core promoter element around -30 of transcription start
GmFtsH15	TATA-box	TATA	519	4	+	Arabidopsis thaliana	core promoter element around -30 of transcription start
GmFtsH15	TATA-box	ATTATA	546	6	+	Brassica napus	core promoter element around -30 of transcription start
GmFtsH15	TATA-box	TATAA	547	5	-	Arabidopsis thaliana	core promoter element around -30 of transcription start
GmFtsH15	TATA-box	TATA	548	4	+	Arabidopsis thaliana	core promoter element around -30 of transcription start
GmFtsH15	TATA-box	ATATAT	734	6	+	Brassica napus	core promoter element around -30 of transcription start
GmFtsH15	TATA-box	TATATA	735	6	+	Arabidopsis thaliana	core promoter element around -30 of transcription start
GmFtsH15	TATA-box	ATATAA	736	6	+	Brassica oleracea	core promoter element around -30 of transcription start
GmFtsH15	TATA-box	TATA	737	4	+	Arabidopsis thaliana	core promoter element around -30 of transcription start
GmFtsH15	TATA-box	TATAAAT	746	7	-	Brassica juncea	core promoter element around -30 of transcription start
GmFtsH15	TATA-box	TATAAA	747	6	-	Helianthus annuus	core promoter element around -30 of transcription start
GmFtsH15	TATA-box	TATAA	748	5	-	Arabidopsis thaliana	core promoter element around -30 of transcription start
GmFtsH15	TATA-box	TATA	749	4	+	Arabidopsis thaliana	core promoter element around -30 of transcription start
GmFtsH15	TATA-box	ATATAT	794	6	+	Brassica napus	core promoter element around -30 of transcription start
GmFtsH15	TATA-box	TATATA	795	6	+	Arabidopsis thaliana	core promoter element around -30 of transcription start
GmFtsH15	TATA-box	ATATAA	796	6	+	Brassica oleracea	core promoter element around -30 of transcription start
GmFtsH15	TATA-box	TATA	797	4	+	Arabidopsis thaliana	core promoter element around -30 of transcription start
GmFtsH15	TATA-box	TACATAAA	868	8	+	Oryza sativa	core promoter element around -30 of transcription start
GmFtsH15	TATA-box	ccTATAAAaa	927	9	+	Arabidopsis thaliana	core promoter element around -30 of transcription start
GmFtsH15	TATA-box	TATA	929	4	+	Arabidopsis thaliana	core promoter element around -30 of transcription start
GmFtsH15	TATA-box	taTATAAAtc	984	9	-	Arabidopsis thaliana	core promoter element around -30 of transcription start
GmFtsH15	TATA-box	TATAAAT	985	7	-	Brassica juncea	core promoter element around -30 of transcription start
GmFtsH15	TATA-box	TATAAA	986	6	-	Helianthus annuus	core promoter element around -30 of transcription start
GmFtsH15	TATA-box	TATATAA	987	7	-	Arabidopsis thaliana	core promoter element around -30 of transcription start
GmFtsH15	TATA-box	TATATA	988	6	+	Arabidopsis thaliana	core promoter element around -30 of transcription start
GmFtsH15	TATA-box	ATATAA	989	6	+	Brassica oleracea	core promoter element around -30 of transcription start
GmFtsH15	TATA-box	TATA	990	4	+	Arabidopsis thaliana	core promoter element around -30 of transcription start
GmFtsH15	TATA-box	TATAAAT	1056	7	-	Brassica juncea	core promoter element around -30 of transcription start
GmFtsH15	TATA-box	TATAAA	1057	6	-	Helianthus annuus	core promoter element around -30 of transcription start
[truncated: 3,066 more rows]
