# Supplementary material for: Genome-Wide Identification and Comprehensive Analysis of the FtsH Gene Family in Soybean (Glycine max)
Source: Int J Mol Sci. 2023 Nov 30;24(23):16996. doi: 10.3390/ijms242316996 (PMC10707429; doi:10.3390/ijms242316996)
Supplement: Supplementary file 1 [file ijms-24-16996-s001.zip › Table S2.xlsx]

## Sheet: Sheet1
	GO Enrichment of GmFtsHs
Category	Term	Count	%	PValue	Genes	List Total	Pop Hits	Pop Total	Fold Enrichment	Bonferroni	Benjamini	FDR
GOTERM_BP_DIRECT	GO:0006508~proteolysis	30	88.2353	1.31e-71	GLYMA_10G164800, GLYMA_17G228100, GLYMA_13G049800, GLYMA_15G158900, GLYMA_18G259700, GLYMA_15G018800, GLYMA_03G089200, GLYMA_14G162200, GLYMA_14G095700, GLYMA_U026800, GLYMA_13G041700, GLYMA_13G355400, GLYMA_20G227000, GLYMA_04G213800, GLYMA_02G225300, GLYMA_14G192100, GLYMA_06G152500, GLYMA_18G065600, GLYMA_08G023900, GLYMA_06G019400, GLYMA_06G126000, GLYMA_14G096000, GLYMA_14G096100, GLYMA_09G2…	34	91	30704	297.712	7.88e-71	7.88e-71	7.88e-71
GOTERM_BP_DIRECT	GO:0034982~mitochondrial protein processing	4	11.7647	3.95e-08	GLYMA_12G061200, GLYMA_11G137700, GLYMA_08G237500, GLYMA_12G061400	34	7	30704	516.034	2.37e-07	1.18e-07	1.18e-07
GOTERM_BP_DIRECT	GO:0065003~macromolecular complex assembly	4	11.7647	9.46e-08	GLYMA_12G061200, GLYMA_11G137700, GLYMA_08G237500, GLYMA_12G061400	34	9	30704	401.359	5.68e-07	1.89e-07	1.89e-07
GOTERM_BP_DIRECT	GO:0045037~protein import into chloroplast stroma	2	5.88235	0.021284	GLYMA_08G023900, GLYMA_08G237500	34	20	30704	90.3059	0.121099	0.031926	0.031926
GOTERM_BP_DIRECT	GO:0009793~embryo development ending in seed dormancy	2	5.88235	0.0328023	GLYMA_08G023900, GLYMA_08G237500	34	31	30704	58.2619	0.181363	0.0393628	0.0393628
GOTERM_CC_DIRECT	GO:0009534~chloroplast thylakoid	27	87.0968	2.70171e-77	GLYMA_10G164800, GLYMA_17G228100, GLYMA_13G049800, GLYMA_15G158900, GLYMA_18G259700, GLYMA_15G018800, GLYMA_03G089200, GLYMA_14G162200, GLYMA_14G095700, GLYMA_U026800, GLYMA_13G041700, GLYMA_13G355400, GLYMA_20G227000, GLYMA_04G213800, GLYMA_02G225300, GLYMA_14G192100, GLYMA_06G152500, GLYMA_18G065600, GLYMA_06G126000, GLYMA_08G023900, GLYMA_06G019400, GLYMA_14G096000, GLYMA_09G237900, GLYMA_14G0…	31	39	33128	739.831	2.16137e-76	2.16137e-76	2.16137e-76
GOTERM_CC_DIRECT	GO:0009526~plastid envelope	10	32.2581	7.51133e-21	GLYMA_12G061200, GLYMA_11G137700, GLYMA_13G049800, GLYMA_15G158900, GLYMA_08G086600, GLYMA_02G225300, GLYMA_05G132000, GLYMA_19G040200, GLYMA_09G052600, GLYMA_14G192100, GLYMA_12G061400	31	35	33128	305.327	6.00907e-20	3.00453e-20	3.00453e-20
GOTERM_CC_DIRECT	GO:0016020~membrane	18	58.0645	2.58352e-15	GLYMA_18G065600, GLYMA_10G164800, GLYMA_17G228100, GLYMA_06G019400, GLYMA_06G126000, GLYMA_18G259700, GLYMA_15G018800, GLYMA_14G096000, GLYMA_09G237900, GLYMA_14G096100, GLYMA_04G019100, GLYMA_03G089200, GLYMA_14G095700, GLYMA_U026800, GLYMA_13G355400, GLYMA_13G041700, GLYMA_20G227000, GLYMA_04G213800, GLYMA_14G124900, GLYMA_06G152500	31	1600	33128	12.0223	2.04281e-14	6.88937e-15	6.88937e-15
GOTERM_CC_DIRECT	GO:0005745~m-AAA complex	4	12.9032	6.69268e-09	GLYMA_12G061200, GLYMA_11G137700, GLYMA_08G237500, GLYMA_12G061400	31	5	33128	854.916	5.35414e-08	1.33854e-08	1.33854e-08
GOTERM_CC_DIRECT	GO:0009536~plastid	6	19.3548	2.55455e-07	GLYMA_08G023900, GLYMA_06G019400, GLYMA_13G041700, GLYMA_14G096100, GLYMA_04G019100, GLYMA_14G124900, GLYMA_08G237500	31	153	33128	41.9077	2.04364e-06	4.08728e-07	4.08728e-07
GOTERM_CC_DIRECT	GO:0009507~chloroplast	5	16.129	0.00737176	GLYMA_12G061200, GLYMA_11G137700, GLYMA_15G158900, GLYMA_08G086600, GLYMA_09G052600, GLYMA_12G061400	31	865	33128	6.17714	0.0574747	0.00982901	0.00982901
GOTERM_CC_DIRECT	GO:0009706~chloroplast inner membrane	2	6.45161	0.0399756	GLYMA_08G023900, GLYMA_08G237500	31	45	33128	47.4953	0.278464	0.0456864	0.0456864
GOTERM_MF_DIRECT	GO:0004176~ATP-dependent peptidase activity	31	100	2.78e-83	GLYMA_11G137700, GLYMA_10G164800, GLYMA_17G228100, GLYMA_13G049800, GLYMA_15G158900, GLYMA_18G259700, GLYMA_15G018800, GLYMA_03G089200, GLYMA_14G162200, GLYMA_14G095700, GLYMA_U026800, GLYMA_13G041700, GLYMA_13G355400, GLYMA_20G227000, GLYMA_04G213800, GLYMA_02G225300, GLYMA_14G192100, GLYMA_06G152500, GLYMA_18G065600, GLYMA_06G126000, GLYMA_08G023900, GLYMA_06G019400, GLYMA_14G096000, GLYMA_09G2…	31	78	35540	455.641	1.95e-82	1.95e-82	1.95e-82
GOTERM_MF_DIRECT	GO:0004222~metalloendopeptidase activity	30	96.7742	6.53e-69	GLYMA_11G137700, GLYMA_10G164800, GLYMA_17G228100, GLYMA_13G049800, GLYMA_15G158900, GLYMA_18G259700, GLYMA_15G018800, GLYMA_03G089200, GLYMA_14G095700, GLYMA_U026800, GLYMA_13G041700, GLYMA_13G355400, GLYMA_20G227000, GLYMA_04G213800, GLYMA_02G225300, GLYMA_14G192100, GLYMA_06G152500, GLYMA_18G065600, GLYMA_06G126000, GLYMA_08G023900, GLYMA_06G019400, GLYMA_14G096000, GLYMA_09G237900, GLYMA_14G0…	31	155	35540	221.894	4.57e-68	2.29e-68	2.29e-68
GOTERM_MF_DIRECT	GO:0016887~ATPase activity	30	96.7742	8.57e-46	GLYMA_11G137700, GLYMA_10G164800, GLYMA_17G228100, GLYMA_13G049800, GLYMA_15G158900, GLYMA_18G259700, GLYMA_15G018800, GLYMA_14G162200, GLYMA_14G095700, GLYMA_U026800, GLYMA_13G041700, GLYMA_13G355400, GLYMA_20G227000, GLYMA_04G213800, GLYMA_02G225300, GLYMA_14G192100, GLYMA_06G152500, GLYMA_18G065600, GLYMA_06G126000, GLYMA_08G023900, GLYMA_06G019400, GLYMA_14G096000, GLYMA_09G237900, GLYMA_14G0…	31	897	35540	38.3429	6e-45	2e-45	2e-45
GOTERM_MF_DIRECT	GO:0005524~ATP binding	31	100	7.02e-25	GLYMA_11G137700, GLYMA_10G164800, GLYMA_17G228100, GLYMA_13G049800, GLYMA_15G158900, GLYMA_18G259700, GLYMA_15G018800, GLYMA_03G089200, GLYMA_14G162200, GLYMA_14G095700, GLYMA_U026800, GLYMA_13G041700, GLYMA_13G355400, GLYMA_20G227000, GLYMA_04G213800, GLYMA_02G225300, GLYMA_14G192100, GLYMA_06G152500, GLYMA_18G065600, GLYMA_06G126000, GLYMA_08G023900, GLYMA_06G019400, GLYMA_14G096000, GLYMA_09G2…	31	5579	35540	6.37032	4.92e-24	1.23e-24	1.23e-24
GOTERM_MF_DIRECT	GO:0008270~zinc ion binding	10	32.2581	1e-06	GLYMA_12G061200, GLYMA_11G137700, GLYMA_13G049800, GLYMA_15G158900, GLYMA_08G086600, GLYMA_02G225300, GLYMA_05G132000, GLYMA_19G040200, GLYMA_09G052600, GLYMA_14G192100, GLYMA_12G061400	31	1333	35540	8.60054	7.02e-06	1.4e-06	1.4e-06
GOTERM_MF_DIRECT	GO:0016464~chloroplast protein-transporting ATPase activity	2	6.45161	0.00505439	GLYMA_08G023900, GLYMA_08G237500	31	6	35540	382.151	0.0348488	0.00589679	0.00589679
