# Supplementary material for: Genome-Wide Identification and Comprehensive Analysis of the FtsH Gene Family in Soybean (Glycine max)
Source: Int J Mol Sci. 2023 Nov 30;24(23):16996. doi: 10.3390/ijms242316996 (PMC10707429; doi:10.3390/ijms242316996)
Supplement: Supplementary file 1 [file ijms-24-16996-s001.zip › Table S3.xlsx]

## Sheet: Sheet1
The FPKM of GmFtsHs in nine different tissues of ‘Glycine max Wm82.a2.v1’.
Gene ID	Flower	Leaves	Nodules	Pod	Root	Root hairs	Seed	Shoot Apical Meristem	Stem
GmFtsH1	12.501	16.43	4.225	8.176	4.162	3.806	3.866	6.076	5.691
GmFtsH2	10.809	87.111	0.714	19.289	3.037	2.382	11.101	15.671	9.378
GmFtsH3	33.117	188.44	3.398	30.698	19.319	7.111	14.014	29.808	13.896
GmFtsH4	63.591	49.436	6.968	14.554	15.61	8.136	14.987	18.964	15.558
GmFtsH5	21.49	12.973	16.356	19.824	20.963	18.147	20.485	15.354	18.804
GmFtsH6	34.101	24.978	24.16	25.703	41.639	28.326	36.404	23.434	25.984
GmFtsH7	3.694	3.615	2.947	3.188	2.961	3.253	3.892	1.126	1.444
GmFtsH8	6.484	18.125	2.53	4.931	1.845	1.988	2.753	3.986	3.583
GmFtsH9	102.892	66.196	7.511	9.37	13.231	6.704	11.484	9.141	13.845
GmFtsH10	0.822	1.824	0.418	0.403	0.395	0.336	1.061	1.9	0.366
GmFtsH11	23.707	23.462	12.779	11.195	23.752	13.126	6.311	9.916	15.907
GmFtsH12	0.209	0.072	0	0.242	0.067	0	0.124	0.241	0.101
GmFtsH13	40.525	164.206	5.957	25.403	3.999	5.213	6.447	15.945	14.55
GmFtsH14	44.581	113.365	6.221	23.726	6.984	6.822	10.684	23.235	19.662
GmFtsH15	7.871	8.632	2.85	3.395	2.418	2.592	4.397	5.014	3.739
GmFtsH16	3.551	13.691	5.498	5.068	3.26	7.437	5.118	6.41	4.812
GmFtsH17	0	0	0	0	0	0	0.001	0	0
GmFtsH18	9.939	16.884	3.647	6.011	3.081	4.032	5.07	7.593	5.831
GmFtsH19	0.068	0.159	0.14	0.112	0.075	0.14	0.219	0.138	0.149
GmFtsH20	15.872	16.979	16.993	13.416	18.934	17.828	15.65	16.28	11.384
GmFtsH21	11.172	11.076	11.575	9.818	10.295	11.05	10.967	9.197	8.567
GmFtsH22	5.714	5.386	4.238	5.336	2.799	5.053	6.535	5.816	4.774
GmFtsH23	0	0	0	0	0	0	0	0	0
GmFtsH24	17.994	24.164	18.855	16.479	23.297	19.771	15.95	13.516	18.342
GmFtsH25	7.95	6.814	5.906	5.904	7.599	6.033	4.341	5.087	7.573
GmFtsHi1	1.332	2.833	2.321	2.076	1.033	2.405	1.985	2.783	1.865
GmFtsHi2	4.103	10.589	5.71	7.163	2.76	6.529	8.054	7.061	6.204
GmFtsHi3	8.352	18.507	8.008	12.142	4.983	11.307	12.992	12.142	9.503
GmFtsHi4	3.101	10.473	4.471	5.718	2.148	7.091	6.648	7.406	4.629
GmFtsHi5	2.304	6.15	1.414	2.264	1.024	1.498	3.064	3.639	1.714
GmFtsHi6	4.899	8.856	4.844	5.402	3.298	5.836	5.143	5.98	5.174
GmFtsHi7	3.5	4.466	3.872	5.928	2.629	4.744	6.195	4.92	3.616
GmFtsHi8	4.733	5.946	1.766	2.945	1.254	1.698	3.588	4	2.745
GmFtsHi9	2.024	3.63	2.194	3.14	0.656	2.188	3.597	3.987	1.863
